# Supplementary material for: STUDIO DEL TESSUTO LINFOIDE ASSOCIATO ALL’INTESTINO (GALT) PERAPPLICAZIONI BIOTECNOLOGICHE IN ACQUICOLTURA DI SPECIE ITTICHE
Source: Royal Society of Chemistry journal article supplement (doi:10.1039/d3sc06193k), 2009-02-24
Supplement: d3sc06193k1.pdf [file d3sc06193k1.pdf]

## Electronic Supporting Information

### Chemo-Selective Stille-type Coupling of Acyl-Chlorides Upon Phosphine-Borane Au(I) Catalysis

Nereida Hidalgo,<sup>a,b</sup> Arnaud Le Gac,<sup>a</sup> Sonia Mallet-Ladeira,<sup>c</sup> Ghenwa Bouhadir,<sup>a\*</sup> Didier  
Bourissou<sup>a\*</sup>

<sup>a</sup>CNRS/Université Paul Sabatier, Laboratoire Hétérochimie Fondamentale et Appliquée  
(LHFA UMR 5069), 118 Route de Narbonne, 31062 Toulouse Cedex 09, France.

<sup>b</sup>Departamento de Química Inorgánica, Universidad de Sevilla, 41071 Sevilla, Spain

<sup>c</sup>Institut de Chimie de Toulouse (FR 2599), 118 Route de Narbonne, 31062 Toulouse  
Cedex 09, France

**Corresponding Author:**

**[didier.bourissou@univ-tlse3.fr](mailto:didier.bourissou@univ-tlse3.fr)**

# Table of Content

|                                                                                                                                                                     |    |
|---------------------------------------------------------------------------------------------------------------------------------------------------------------------|----|
| <b>1. General considerations</b> .....                                                                                                                              | 3  |
| <b>2. Procedures, spectroscopic data and NMR spectra</b> .....                                                                                                      | 4  |
| Synthesis of the Au complex <b>II</b> .....                                                                                                                         | 4  |
| Synthesis of the Au complex <b>III</b> .....                                                                                                                        | 10 |
| Synthesis of digold complex <b>A</b> .....                                                                                                                          | 17 |
| From Me <sub>3</sub> SnPh: .....                                                                                                                                    | 17 |
| Alternative procedures from Ph <sub>2</sub> Zn or complex <b>III</b> .....                                                                                          | 18 |
| Synthesis of digold complex <b>B</b> .....                                                                                                                          | 25 |
| General procedure for the synthesis of (PBMe <sub>2</sub> )AuNTf <sub>2</sub> and (PBpin)AuNTf <sub>2</sub> .....                                                   | 30 |
| PBMe <sub>2</sub> AuCl.....                                                                                                                                         | 30 |
| PBMe <sub>2</sub> AuNTf <sub>2</sub> .....                                                                                                                          | 33 |
| PBpinAuCl .....                                                                                                                                                     | 37 |
| PBpinAuNTf <sub>2</sub> .....                                                                                                                                       | 42 |
| <b>3. General procedure for control experiments</b> .....                                                                                                           | 49 |
| <b>4. General procedure for Stille coupling with (PBCy<sub>2</sub>)AuNTf<sub>2</sub> complex <b>II</b> as catalyst and associated competitive experiments</b> ..... | 49 |
| Scope.....                                                                                                                                                          | 50 |
| Competitive Stille experiments with complex <b>II</b> as catalyst.....                                                                                              | 51 |
| Selective Stille coupling of bifunctional substrates.....                                                                                                           | 51 |
| <b>5. Stoichiometric and catalytic reactions of (μ-Ph)[Au(PBCy<sub>2</sub>)<sub>2</sub>NTf<sub>2</sub> complex <b>A</b>52</b>                                       |    |
| Stoichiometric reactions of complex <b>A</b> with 4-fluorobenzoyl chloride.....                                                                                     | 52 |
| Stille coupling with <b>A</b> as catalyst .....                                                                                                                     | 52 |
| <b>6. <sup>31</sup>P NMR monitoring of catalytic Stille coupling with <b>II</b> as catalyst</b> .....                                                               | 54 |
| <b>7. Determination of kinetic dependence on <b>II</b> in catalytic Stille coupling</b> .....                                                                       | 56 |
| <b>8. Stille coupling with (Ph<sub>3</sub>P)AuNTf<sub>2</sub> as catalyst</b> .....                                                                                 | 58 |
| <b>9. Stille coupling with (μ-MeOPh)[Au(PPh<sub>3</sub>)<sub>2</sub>NTf<sub>2</sub> in the presence of BPh<sub>3</sub> or BMe<sub>3</sub></b> .....                 | 58 |
| <b>10. Stoichiometric reaction of complex <b>B</b> with Me<sub>3</sub>SnPh</b> .....                                                                                | 58 |
| <b>11. Crystallographic Data</b> .....                                                                                                                              | 59 |
| <b>12. References</b> .....                                                                                                                                         | 61 |

## 1. General considerations

All preparations and manipulations were performed by using standard Schlenk and glovebox techniques, under an atmosphere of argon. All solvents were dried using a MBRAUN Solvent Purification System (SPS) and degassed using freeze-pump-thaw method. Internal standards, C<sub>6</sub>F<sub>6</sub> and 1,2-dichloroethane, were dried with 3 Å molecular sieves and degassed prior to use. PBCy<sub>2</sub>,<sup>1</sup> PBCy<sub>2</sub>AuCl (**I**),<sup>1</sup> PBMe<sub>2</sub>,<sup>2</sup> and PBpin<sup>3</sup> and were prepared as previously described. All other reagents were used as received from commercial suppliers. Mass spectra were recorded on a Waters LCT mass spectrometer. <sup>1</sup>H, <sup>13</sup>C, <sup>31</sup>P, <sup>11</sup>B and <sup>19</sup>F NMR spectra were recorded on a Bruker Avance III HD 500, Avance III HD 400, Avance II 300 and Avance I 300 spectrometers. NMR experiments were performed in deuterated solvents and recorded at ambient temperature (298 K). Chemical shifts (δ) are reported in parts per million (ppm) relative to residual <sup>1</sup>H and <sup>13</sup>C solvent signals. External BF<sub>3</sub>·OEt<sub>2</sub>, 85% H<sub>3</sub>PO<sub>4</sub> in water and CFCl<sub>3</sub> were used as reference for <sup>11</sup>B, <sup>31</sup>P and <sup>19</sup>F NMR, respectively. The following abbreviations and their combinations are used: br, broad; s, singlet; d, doublet; t, triplet; q, quartet; m, multiplet.

## 2. Procedures, spectroscopic data and NMR spectra

### Synthesis of the Au complex II

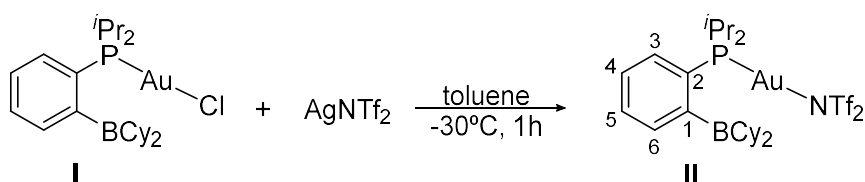

To a solution of PBCy<sub>2</sub>AuCl (**I**) (100 mg, 0.166 mmol, 1 Equiv.) in toluene (5 mL) was added AgNTf<sub>2</sub> (64.4 mg, 0.166 mmol, 1 Equiv.) in toluene (5 mL) under Ar atmosphere. The mixture covered with aluminium foil was stirred at -30 °C for 1 hour. The solution was filtered to remove white precipitate of AgCl, and the volatiles were removed under vacuum to yield complex **II** as white powder (71 mg, 50%). M.p.= 100.5 °C (decomposition).

<sup>1</sup>H NMR (500 MHz, 298 K, C<sub>6</sub>D<sub>6</sub>) δ 7.09 (pseudo-tdd, <sup>3</sup>J<sub>H-H</sub> = 7.6, <sup>4</sup>J<sub>H-H</sub> = 1.2, <sup>5</sup>J<sub>H-P</sub> = 2.4 Hz, 1H, H<sub>5</sub>), 6.89 (pseudo-tdd, <sup>3</sup>J<sub>H-H</sub> = 7.6, <sup>4</sup>J<sub>H-H</sub> = 1.2, <sup>4</sup>J<sub>H-P</sub> = 2.4 Hz, 1H, H<sub>4</sub>), 6.77 (dbr, <sup>3</sup>J<sub>H-H</sub> = 7.6 Hz, 1H, H<sub>6</sub>), 6.72 (pseudo-tbr, <sup>3</sup>J<sub>H-H</sub> = <sup>3</sup>J<sub>H-P</sub> = 7.6 Hz, 1H, H<sub>3</sub>), 2.20 – 2.09 (m, 4H, CH<sub>Cy</sub>, CH<sub>2Cy</sub>), 1.98 – 1.92 (m, 2H, CH<sub>2Cy</sub>), 1.88 – 1.82 (m, 2H, CH<sub>2Cy</sub>), 1.76 – 1.64 (m, 6H, CH<sub>iPr</sub>, CH<sub>2Cy</sub>), 1.55 – 1.39 (m, 4H, CH<sub>2Cy</sub>), 1.34 – 1.14 (m, 4H, CH<sub>2Cy</sub>), 1.04 – 0.96 (m, 2H, CH<sub>2Cy</sub>), 0.86 (dd, <sup>3</sup>J<sub>H-H</sub> = 7.0, <sup>3</sup>J<sub>H-P</sub> = 18.7 Hz, 6H, CH<sub>3iPr</sub>), 0.69 (dd, <sup>3</sup>J<sub>H-H</sub> = 7.0, <sup>3</sup>J<sub>H-P</sub> = 17.1 Hz, 6H, CH<sub>3iPr</sub>).

<sup>13</sup>C{<sup>1</sup>H} NMR (126 MHz, 298 K, C<sub>6</sub>D<sub>6</sub>) δ 157.6 (d, <sup>2</sup>J<sub>C-P</sub> = 25 Hz, C<sub>1</sub>), 131.0 (d, <sup>2</sup>J<sub>C-P</sub> = 6 Hz, C<sub>3</sub>), 130.4 (d, <sup>4</sup>J<sub>C-P</sub> = 3 Hz, C<sub>5</sub>), 126.6 (d, <sup>3</sup>J<sub>C-P</sub> = 17 Hz, C<sub>6</sub>), 126.2 (d, <sup>3</sup>J<sub>C-P</sub> = 9 Hz, C<sub>4</sub>), 125.1 (d, <sup>1</sup>J<sub>C-P</sub> = 58 Hz, C<sub>2</sub>), 120.7 (q, <sup>1</sup>J<sub>C-F</sub> = 323 Hz, CF<sub>3</sub>), 39.2 (sbr, B-CH<sub>Cy</sub>), 31.2 (s, CH<sub>2Cy</sub>), 29.0 (s, CH<sub>2Cy</sub>), 28.4 (s, CH<sub>2Cy</sub>), 27.9 (d, <sup>1</sup>J<sub>C-P</sub> = 36 Hz, CH<sub>iPr</sub>), 27.8 (s, CH<sub>2Cy</sub>), 27.2 (s, CH<sub>2Cy</sub>), 19.5 (s, CH<sub>3iPr</sub>).

<sup>31</sup>P{<sup>1</sup>H} NMR (203 MHz, 298 K, C<sub>6</sub>D<sub>6</sub>) δ 53.0.

<sup>19</sup>F{<sup>1</sup>H} NMR (282 MHz, 298 K, C<sub>6</sub>D<sub>6</sub>) δ -73.7.

<sup>11</sup>B{<sup>1</sup>H} NMR (160 MHz, 298 K, C<sub>6</sub>D<sub>6</sub>) δ Not detected.

HRMS-DCI(CH<sub>4</sub>) (*m/z*): found [M]<sup>+</sup> 846.1721, calcd. C<sub>29</sub>H<sub>39</sub>Au<sup>11</sup>BF<sub>6</sub>NO<sub>4</sub>PS<sub>2</sub> requires 846.1721.

$^1\text{H}$  NMR spectrum (500 MHz, 298 K) in  $\text{C}_6\text{D}_6$

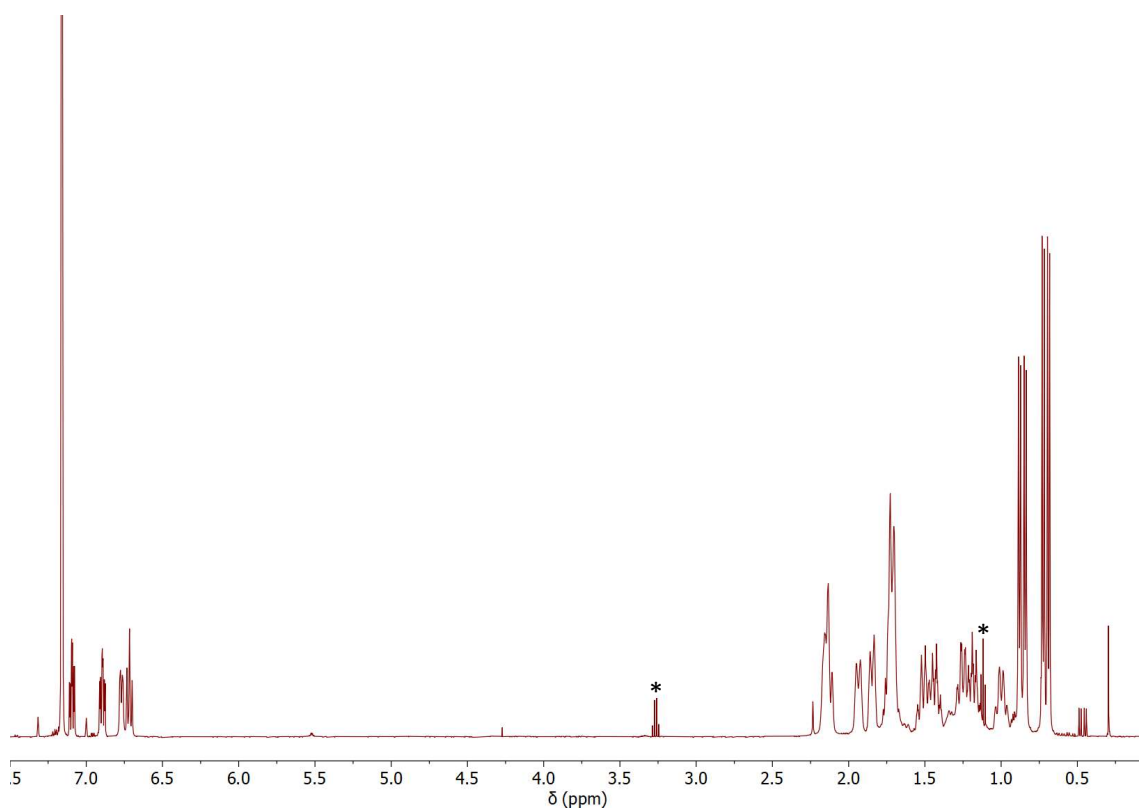

\*  $\text{Et}_2\text{O}$

$^1\text{H}\{^{31}\text{P}\}$  NMR spectrum (500 MHz, 298 K) in  $\text{C}_6\text{D}_6$

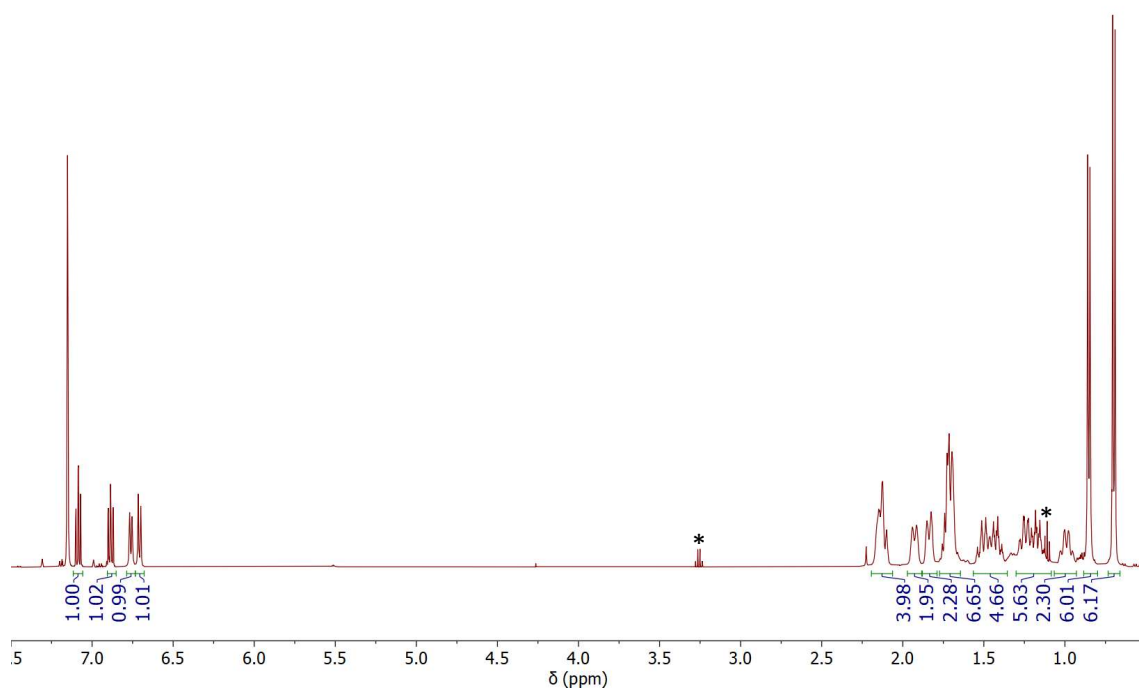

\*  $\text{Et}_2\text{O}$

### $^1\text{H}$ NMR spectrum (500 MHz, 298 K) in $\text{C}_6\text{D}_6$ ; aromatic region

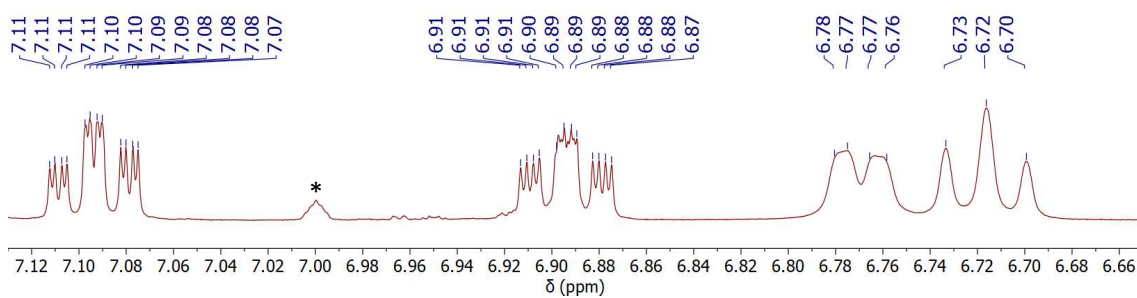

\* Unidentified minor impurity

### $^1\text{H}\{^{31}\text{P}\}$ NMR spectrum (500 MHz, 298 K) in $\text{C}_6\text{D}_6$ ; aromatic region

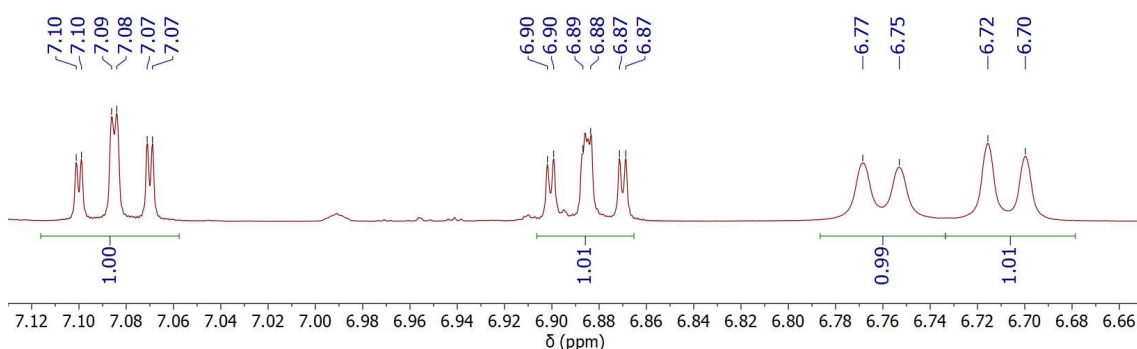

### $^1\text{H}$ NMR spectrum (500 MHz, 298 K) in $\text{C}_6\text{D}_6$ ; aliphatic region

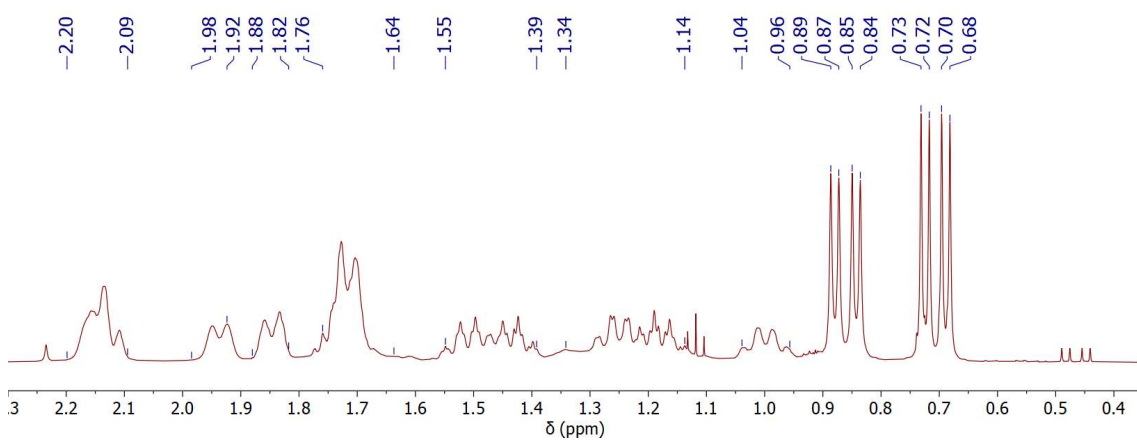

### $^1\text{H}\{^{31}\text{P}\}$ NMR spectrum (500 MHz, 298 K) in $\text{C}_6\text{D}_6$ ; aliphatic region

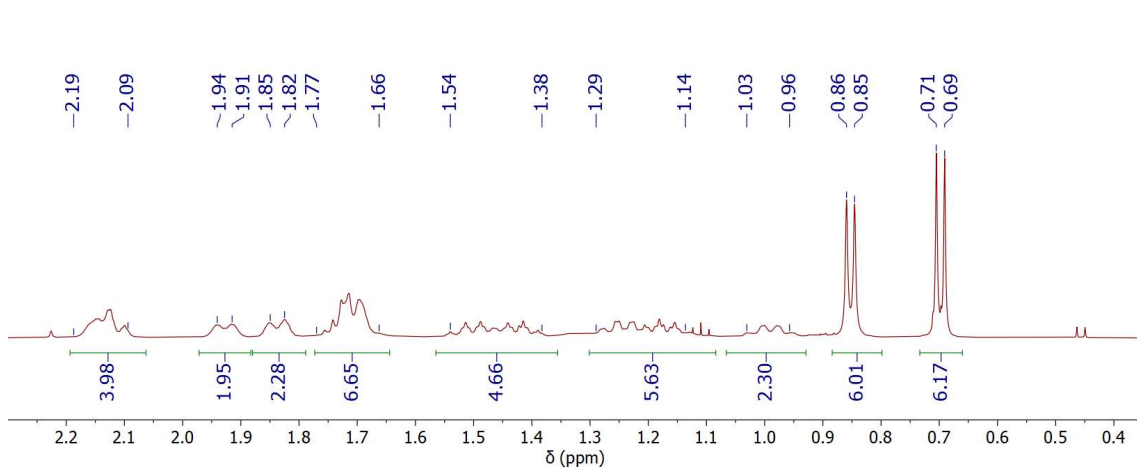

$^{13}\text{C}\{^1\text{H}\}$  NMR (JMOD) spectrum (126 MHz, 298 K) in  $\text{C}_6\text{D}_6$

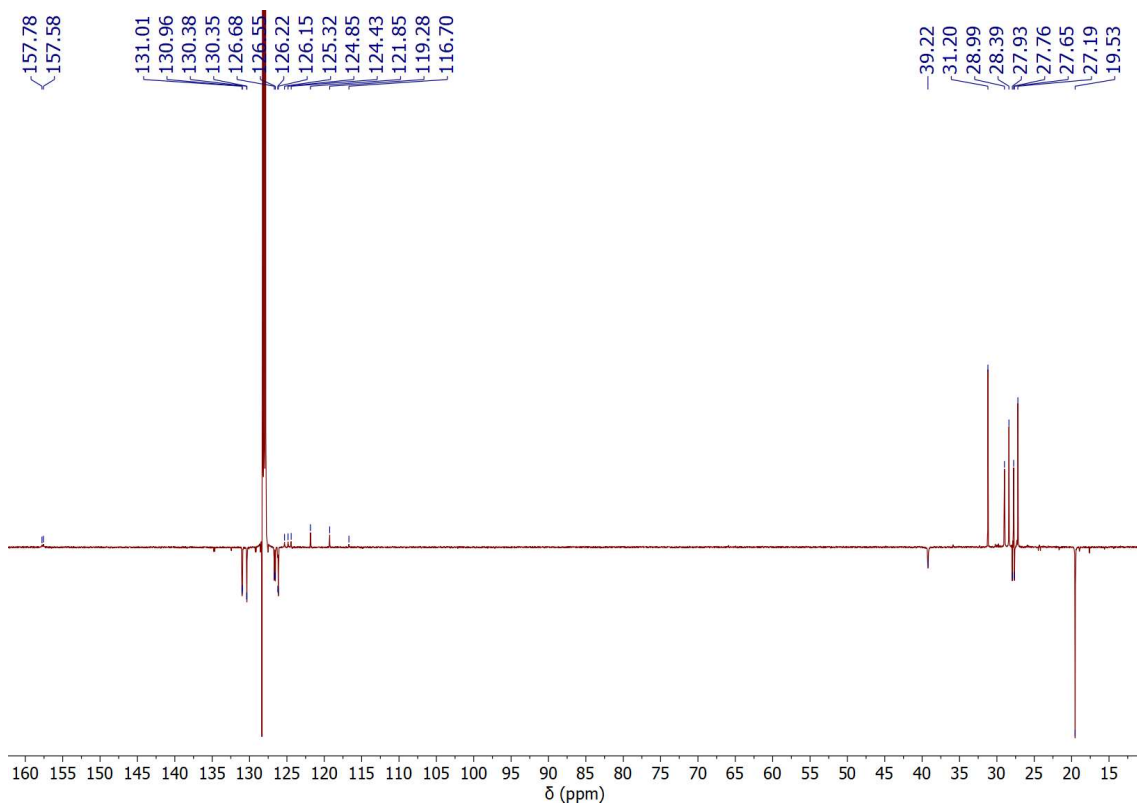

$^{13}\text{C}\{^1\text{H}\}$  NMR (JMOD) spectrum (126 MHz, 298 K) in  $\text{C}_6\text{D}_6$ ; aromatic region

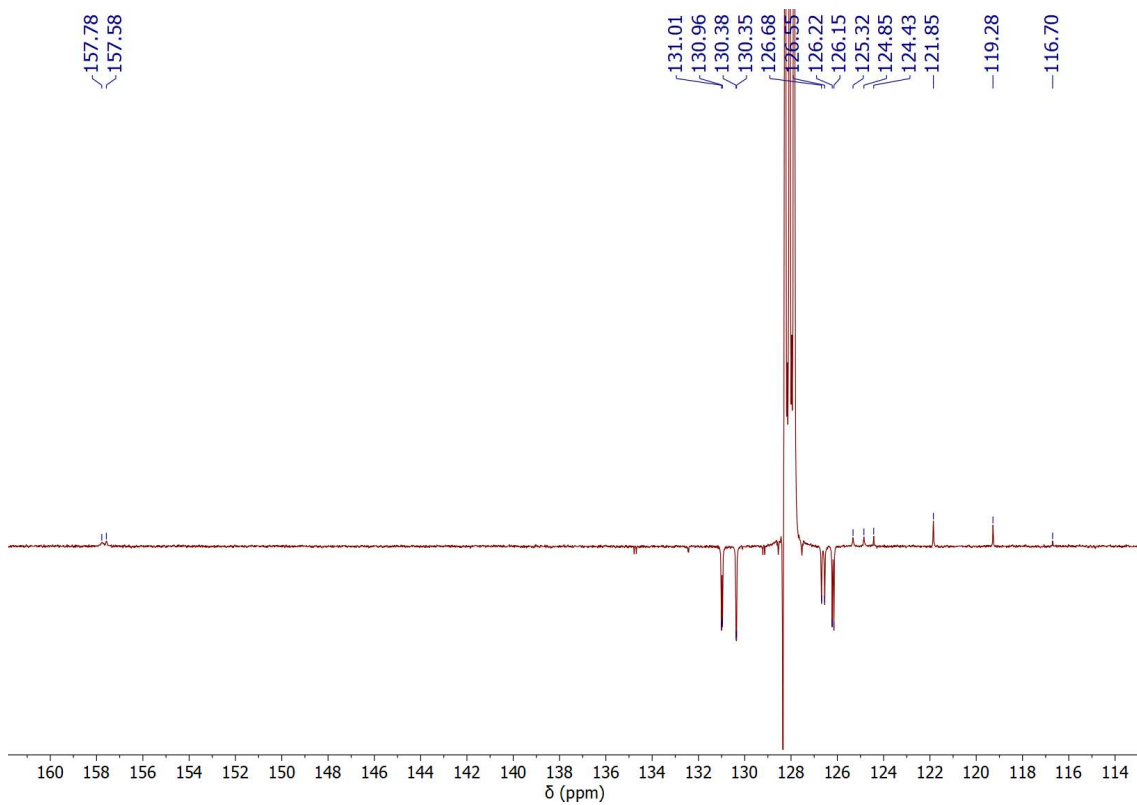

$^{13}\text{C}\{^1\text{H}\}$  NMR (JMOD) spectrum (126 MHz, 298 K) in  $\text{C}_6\text{D}_6$ ; aliphatic region

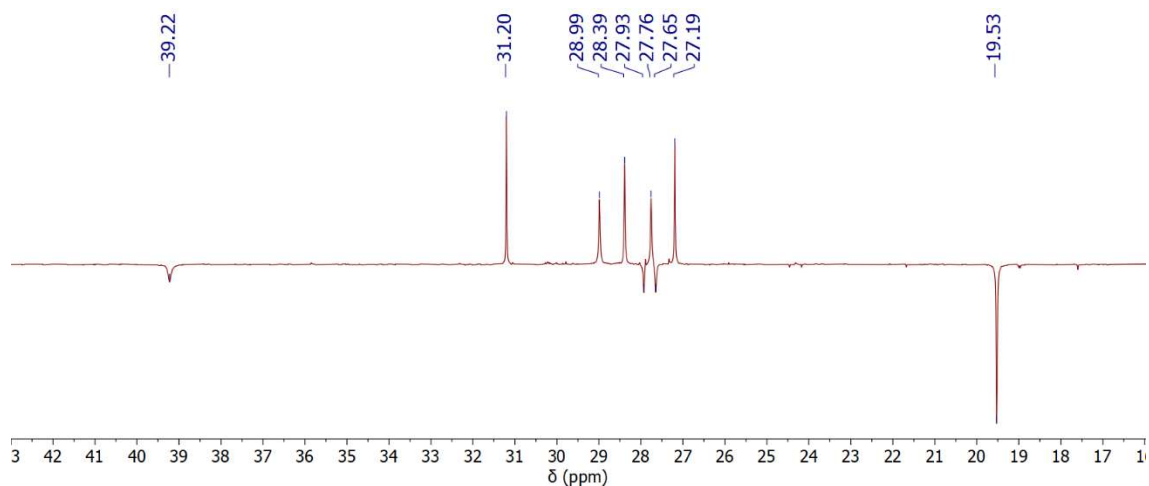

HSQC NMR (100 MHz, 298 K) in  $\text{C}_6\text{D}_6$ ; aliphatic region

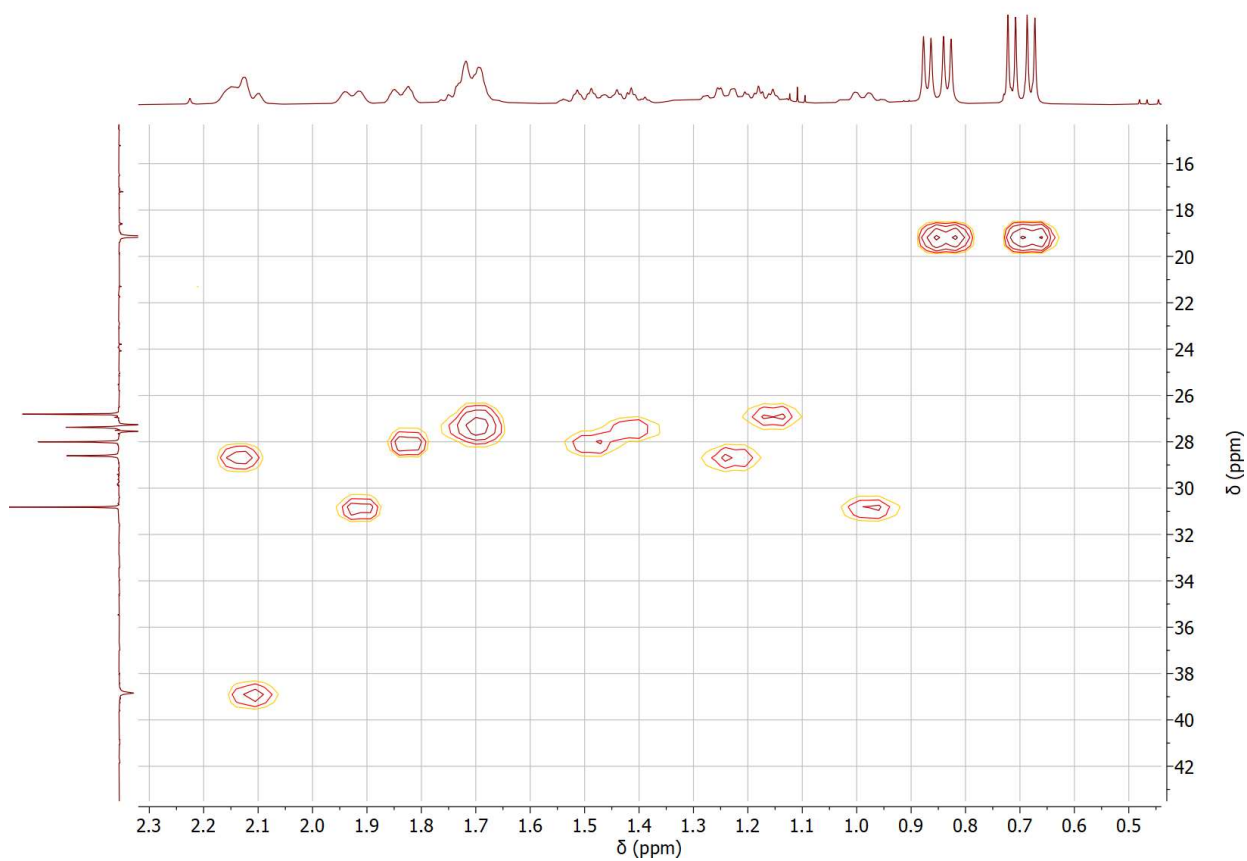



$^{31}\text{P}\{^1\text{H}\}$  NMR spectrum (203 MHz, 298 K) in  $\text{C}_6\text{D}_6$

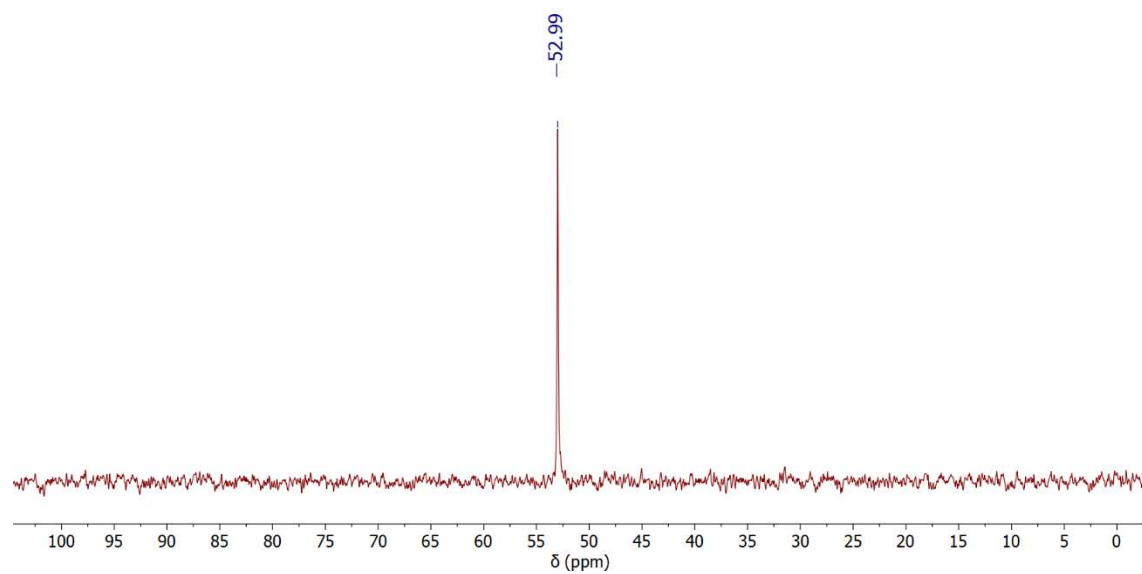

$^{19}\text{F}\{^1\text{H}\}$  NMR spectrum (282 MHz, 298 K) in  $\text{C}_6\text{D}_6$

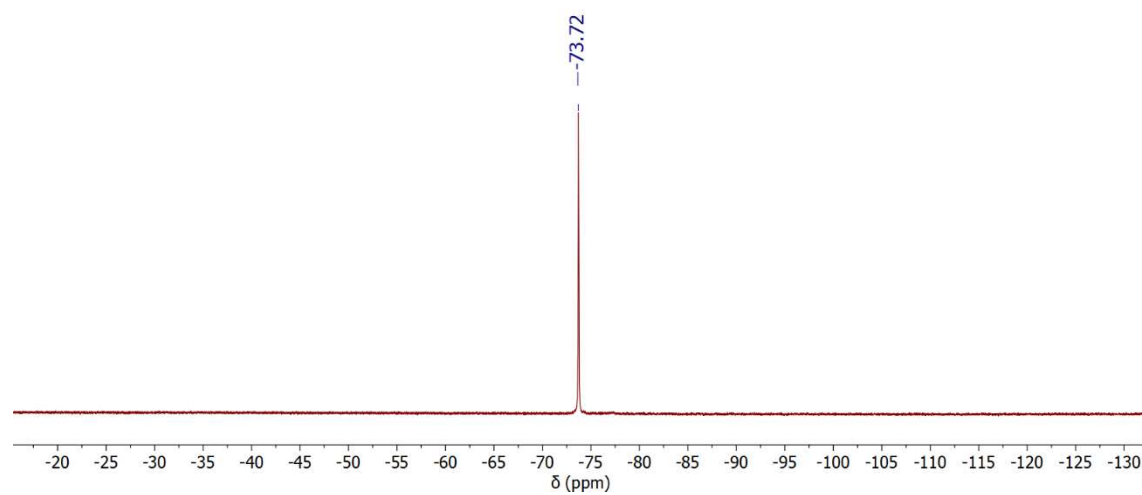

## Synthesis of the Au complex III

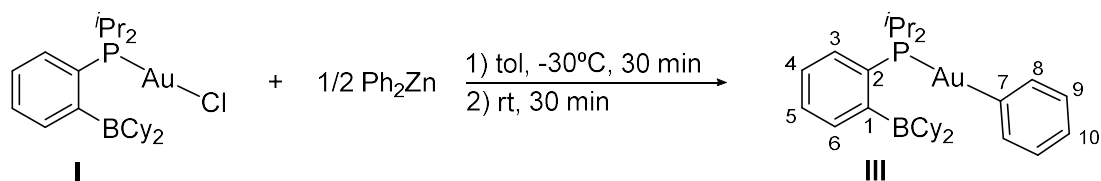

A solution of  $\text{Ph}_2\text{Zn}$  (12.8 mg, 0.058 mmol, 1 Equiv.) in 5 mL of toluene was added to a solution of gold complex **I** (70 mg, 0.120 mmol, 2 Equiv.) in toluene (3 mL) at  $-30^\circ\text{C}$ . The reaction was stirred at that temperature for 30 min and 30 min at room temperature and then, it was filtered to remove  $\text{ZnCl}_2$  and the supernatant was evaporated. The crude was dissolved in  $\text{Et}_2\text{O}$  (10 mL), filtered, and concentrated (2 mL approx.). **III** was isolated as colourless solid by crystallization of saturated solution of  $\text{Et}_2\text{O}$  after 1 day at  $-30^\circ\text{C}$  (41 mg, 55%). M.p. =  $79.8^\circ\text{C}$  (decomposition).

$^1\text{H}$  NMR (400 MHz, 298 K,  $\text{C}_6\text{D}_6$ )  $\delta$  7.98 (pseudo-ddbr,  $^3J_{\text{H-H}} = ^3J_{\text{H-P}} = 7.6$ ,  $^4J_{\text{H-P}} = 1.7$  Hz, 2H,  $\text{H}_8$ ), 7.52 (td,  $^3J_{\text{H-H}} = 7.6$ ,  $^5J_{\text{H-P}} = 1.6$  Hz, 2H,  $\text{H}_9$ ), 7.22 (pseudo-ttd,  $^3J_{\text{H-H}} = 7.6$ ,  $^4J_{\text{H-H}} = 1.5$ ,  $^6J_{\text{H-P}} = 0.5$  Hz, 1H,  $\text{H}_{10}$ ), 7.18 – 7.14 (m, 1H,  $\text{H}_5$ ), 7.01 (pseudo-tdd,  $^3J_{\text{H-H}} = 7.6$ ,  $^4J_{\text{H-H}} = 1.5$ ,  $^4J_{\text{H-P}} = 1.7$  Hz, 1H,  $\text{H}_4$ ), 6.98 – 6.91 (m, 2H,  $\text{H}_3$ ,  $\text{H}_6$ ), 2.25 – 2.22 (m, 2H,  $\text{CH}_2\text{Cy}$ ), 2.13 – 1.96 (m, 6H,  $\text{CH}_2\text{Cy}$ ,  $\text{CH}_{\text{Cy}}$ ,  $\text{CH}_{i\text{Pr}}$ ), 1.82 – 1.70 (m, 6H,  $\text{CH}_2\text{Cy}$ ), 1.48 – 1.30 (m, 6H,  $\text{CH}_2\text{Cy}$ ), 1.26 – 1.11 (m, 4H,  $\text{CH}_2\text{Cy}$ ), 1.02 (dd,  $^3J_{\text{H-H}} = 6.9$ ,  $^3J_{\text{H-P}} = 15.8$  Hz, 6H,  $\text{CH}_{3i\text{Pr}}$ ), 0.92 (dd,  $^3J_{\text{H-H}} = 6.9$ ,  $^3J_{\text{H-P}} = 15.8$  Hz, 6H,  $\text{CH}_{3i\text{Pr}}$ ).

$^{13}\text{C}\{^1\text{H}\}$  NMR (100 MHz, 298 K,  $\text{C}_6\text{D}_6$ )  $\delta$  178.9 (d,  $^2J_{\text{C-P}} = 113$  Hz,  $\text{C}_7$ ), 159.3 (sbr,  $\text{C}_1$ ), 139.8 (sbr,  $\text{C}_8$ ), 131.5 (d,  $^2J_{\text{C-P}} = 3$  Hz,  $\text{C}_3$ ), 129.7 (d,  $^1J_{\text{C-P}} = 45$  Hz,  $\text{C}_2$ ), 129.4 (d,  $^4J_{\text{C-P}} = 3$  Hz,  $\text{C}_5$ ), 128.0 (s,  $\text{C}_9$ ), 127.1 (d,  $^3J_{\text{C-P}} = 18$  Hz,  $\text{C}_6$ ), 126.2 (s,  $\text{C}_{10}$ ), 125.9 (d,  $^3J_{\text{C-P}} = 7$  Hz,  $\text{C}_4$ ), 39.6 (s,  $\text{B-CH}_{\text{Cy}}$ ), 31.4 (s,  $\text{CH}_2\text{Cy}$ ), 29.7 (s,  $\text{CH}_2\text{Cy}$ ), 28.8 (s,  $\text{CH}_2\text{Cy}$ ), 28.5 (s,  $\text{CH}_2\text{Cy}$ ), 27.5 (s,  $\text{CH}_2\text{Cy}$ ), 27.1 (d,  $^1J_{\text{C-P}} = 27$  Hz,  $\text{CH}_{i\text{Pr}}$ ), 19.9 (d,  $^2J_{\text{C-P}} = 2$  Hz,  $\text{CH}_{3i\text{Pr}}$ ), 19.7 (d,  $^2J_{\text{C-P}} = 5$  Hz,  $\text{CH}_{3i\text{Pr}}$ ).

$^{31}\text{P}\{^1\text{H}\}$  NMR (162 MHz, 298 K,  $\text{C}_6\text{D}_6$ )  $\delta$  61.4.

$^{11}\text{B}\{^1\text{H}\}$  NMR (128 MHz, 298 K,  $\text{C}_6\text{D}_6$ )  $\delta$  Not detected.

HRMS-DCI( $\text{CH}_4$ ) ( $m/z$ ): found  $[\text{MH}]^+ - \text{C}_6\text{H}_6$  567.2625, calcd.  $\text{C}_{24}\text{H}_{40}\text{Au}^{11}\text{BP}$  requires 567.2626.

$^1\text{H}$  NMR spectrum (400 MHz, 298 K) in  $\text{C}_6\text{D}_6$

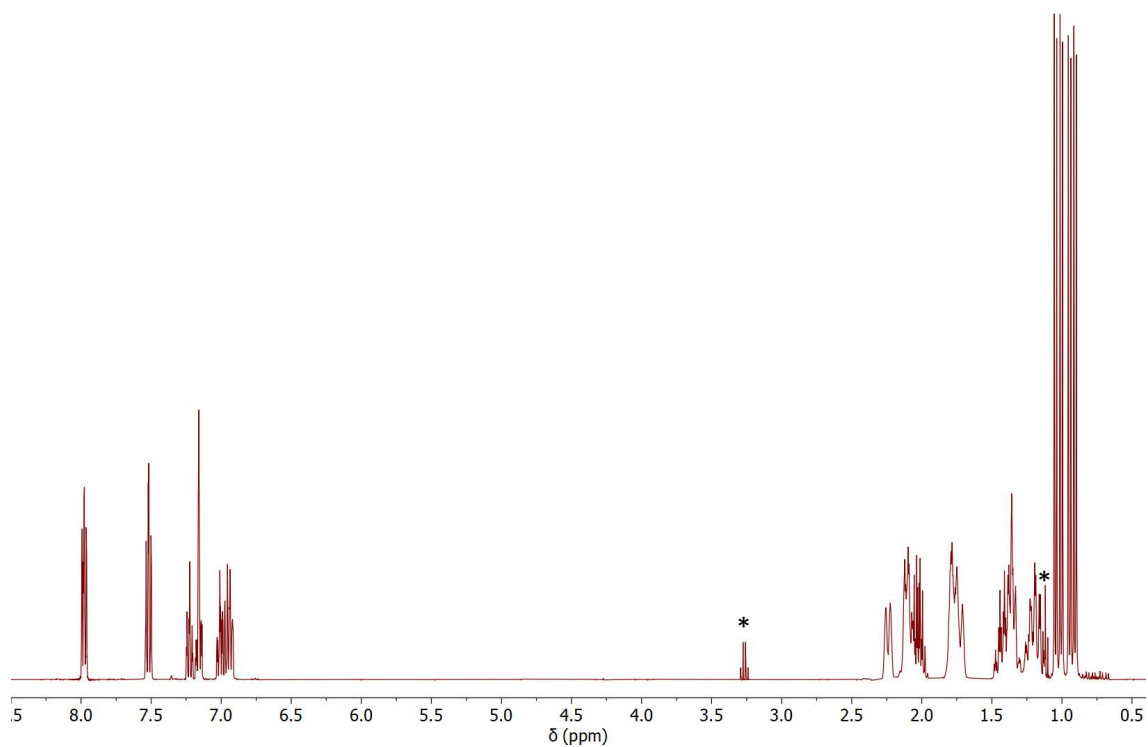

\*  $\text{Et}_2\text{O}$

$^1\text{H}\{^{31}\text{P}\}$  NMR spectrum (400 MHz, 298 K) in  $\text{C}_6\text{D}_6$

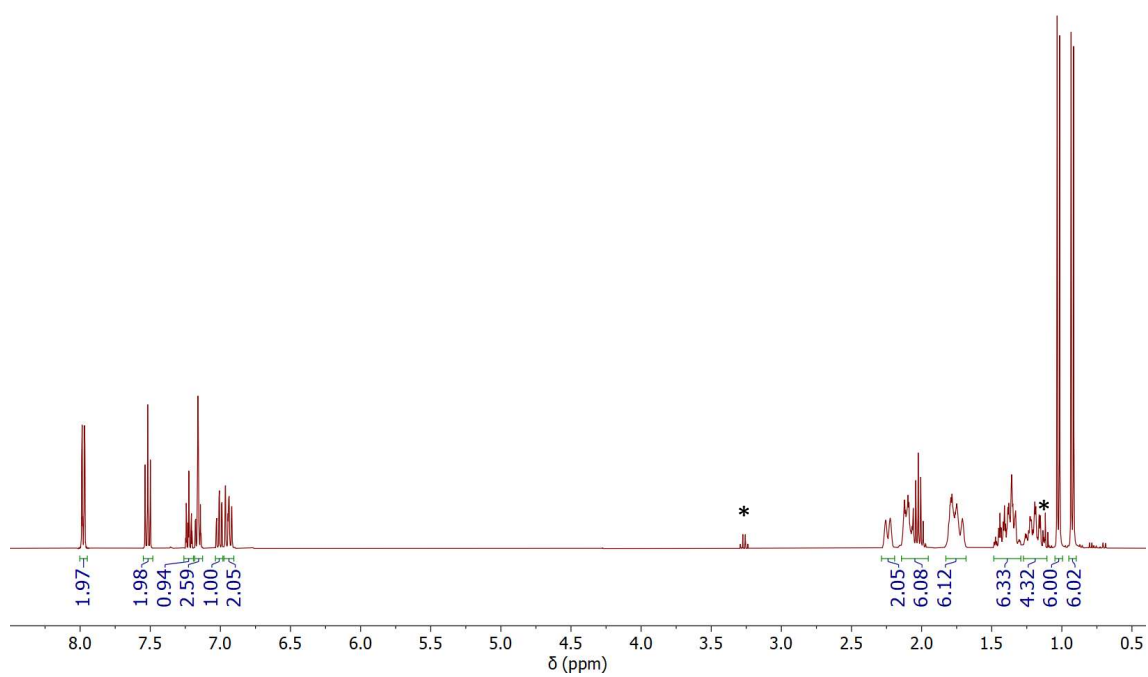

\*  $\text{Et}_2\text{O}$

$^1\text{H}$  NMR spectrum (400 MHz, 298 K) in  $\text{C}_6\text{D}_6$ ; aromatic region

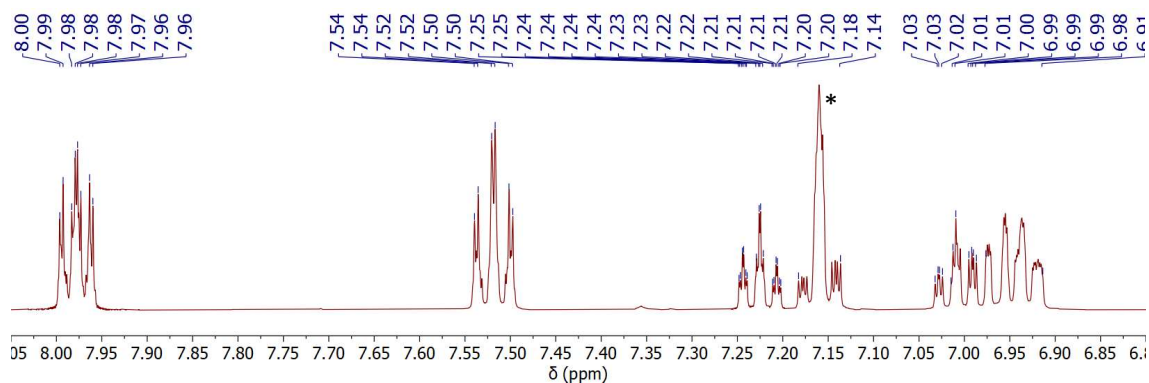

\*  $\text{C}_6\text{H}_6$  residual

$^1\text{H}\{^{31}\text{P}\}$  NMR spectrum (400 MHz, 298 K) in  $\text{C}_6\text{D}_6$ ; aromatic region

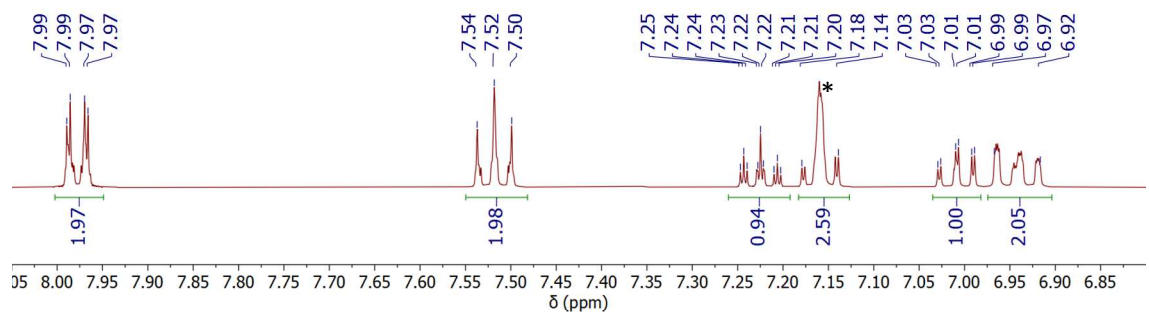

\*  $\text{C}_6\text{H}_6$  residual

$^1\text{H}$  NMR spectrum (400 MHz, 298 K) in  $\text{C}_6\text{D}_6$ ; aliphatic region

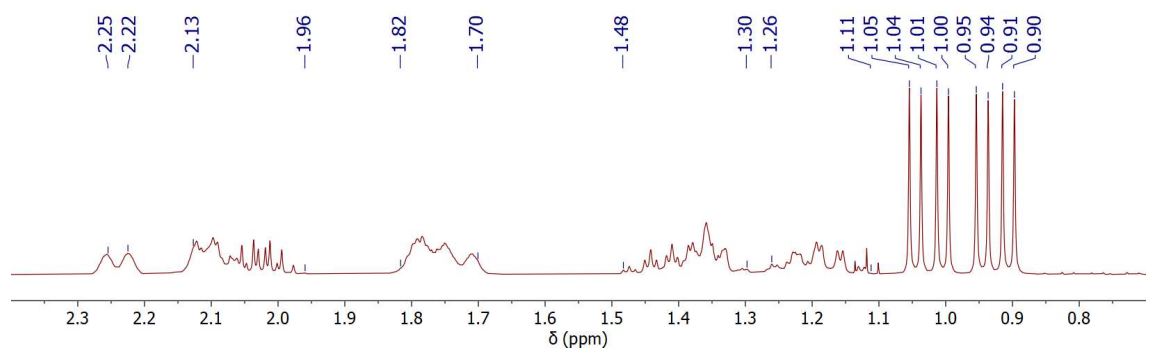

$^1\text{H}\{^{31}\text{P}\}$  NMR spectrum (400 MHz, 298 K) in  $\text{C}_6\text{D}_6$ ; aliphatic region

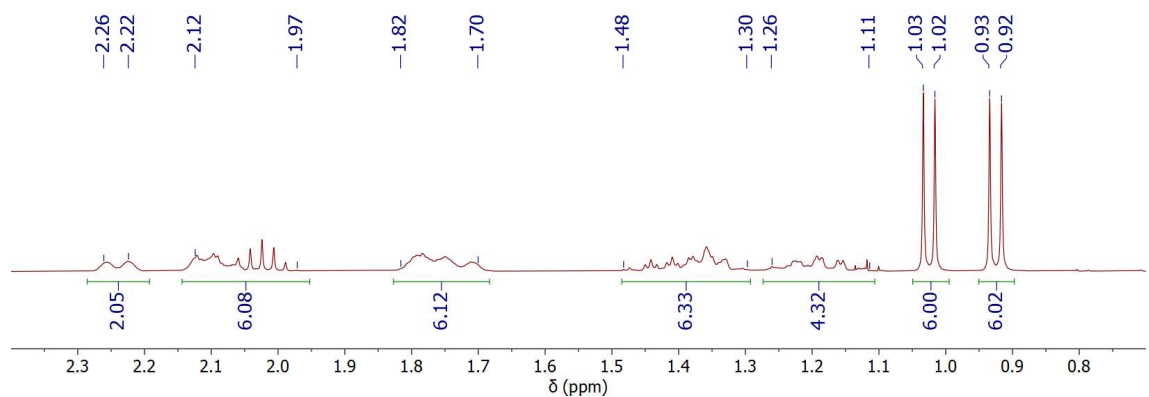

$^{13}\text{C}\{^1\text{H}\}$  NMR (JMOD) spectrum (100 MHz, 298 K) in  $\text{C}_6\text{D}_6$

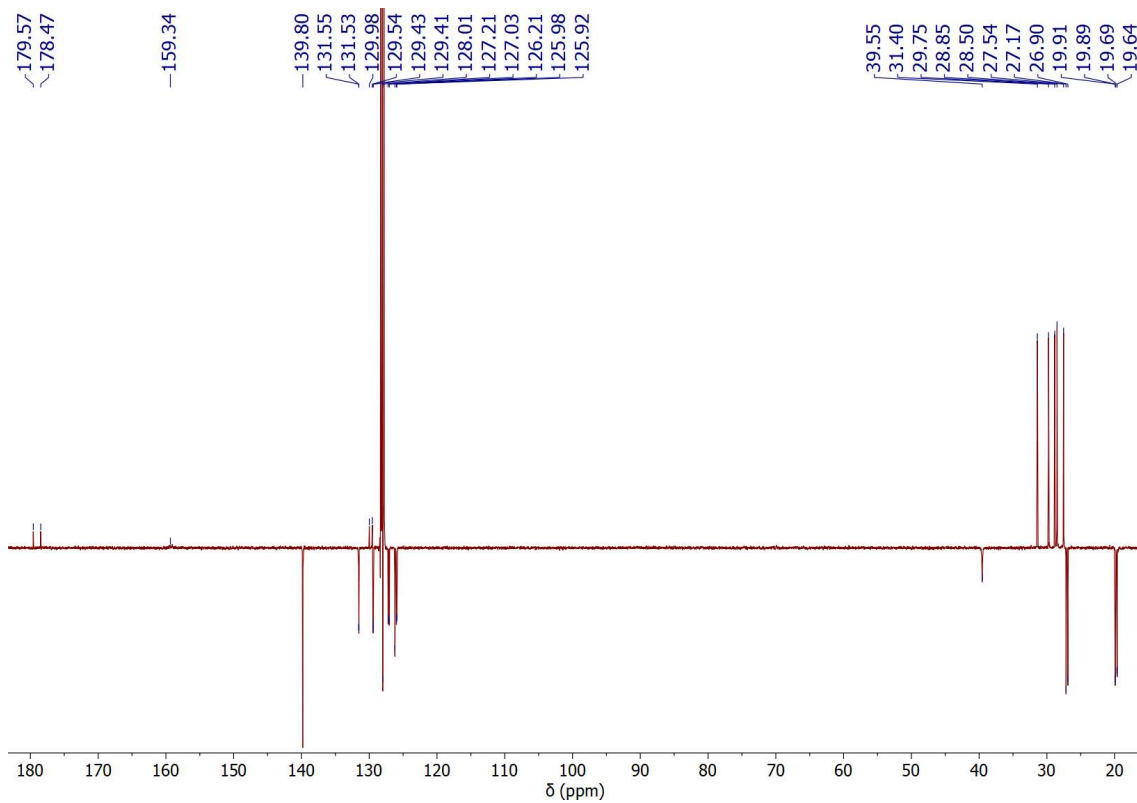

$^{13}\text{C}\{^1\text{H};^{31}\text{P}\}$  NMR spectrum (100 MHz, 298 K) in  $\text{C}_6\text{D}_6$

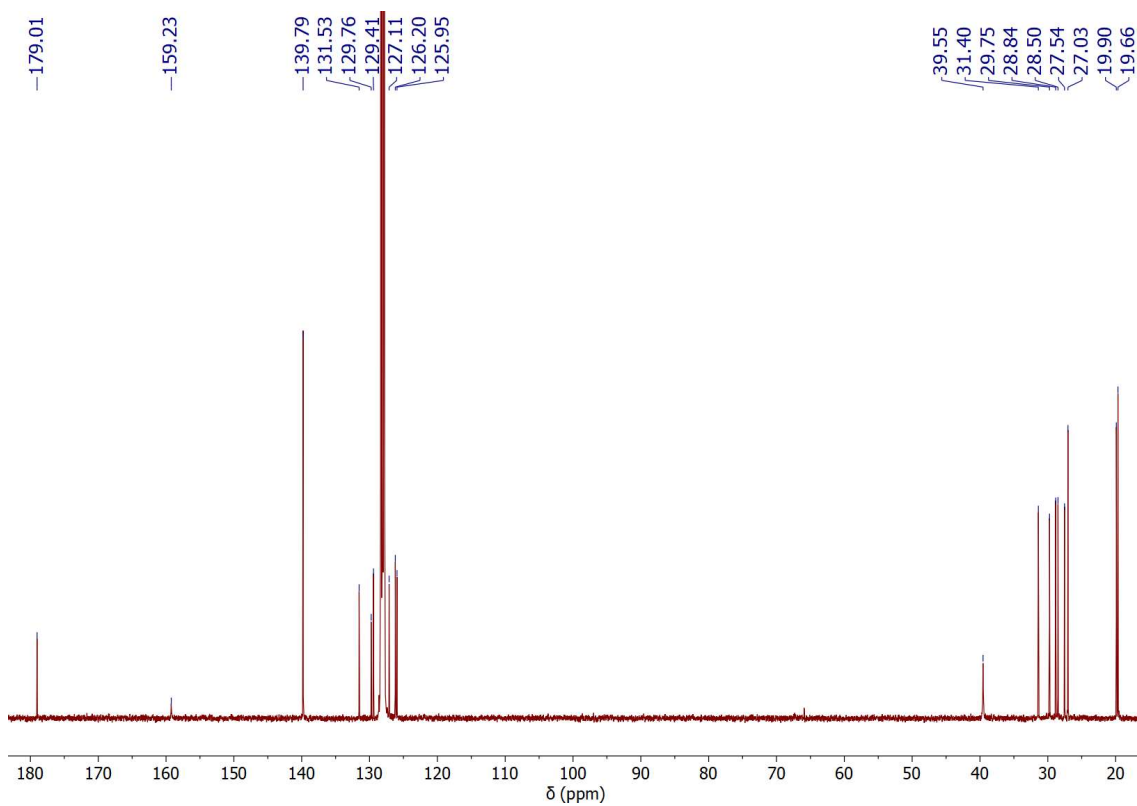

$^{13}\text{C}\{^1\text{H}\}$  NMR (JMOD) spectrum (100 MHz, 298 K) in  $\text{C}_6\text{D}_6$ ; aromatic region

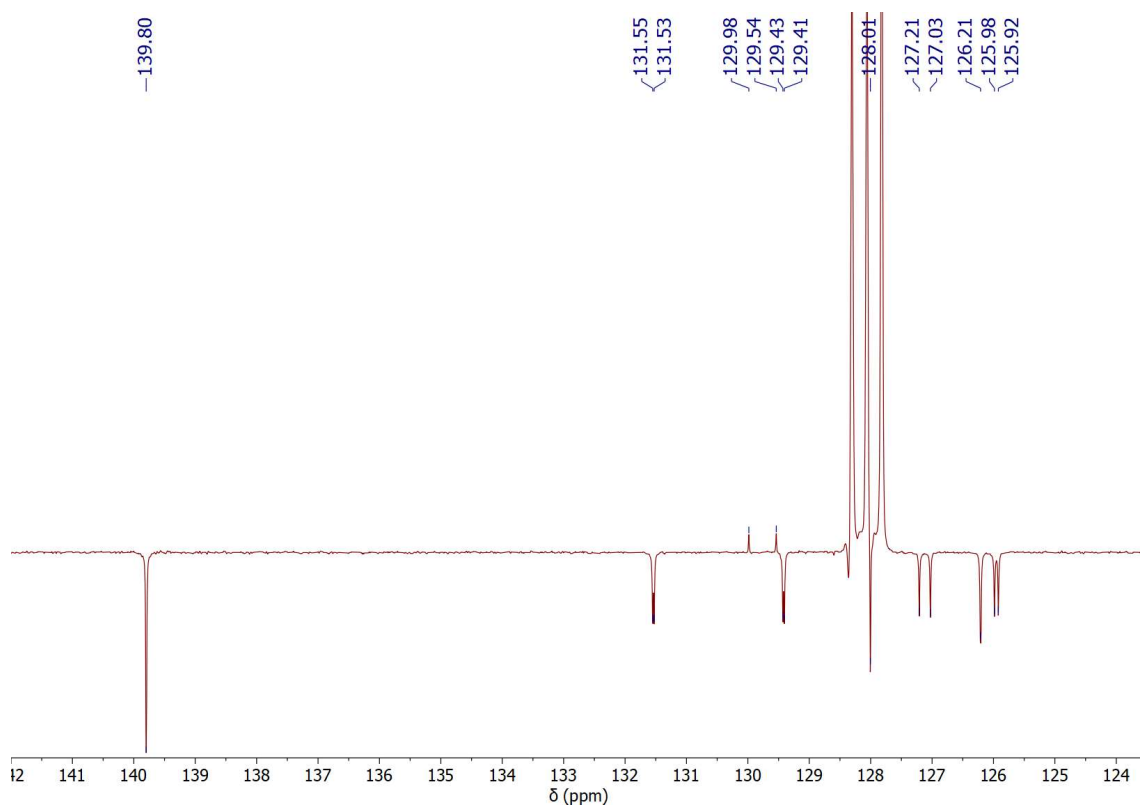

$^{13}\text{C}\{^1\text{H};^{31}\text{P}\}$  NMR spectrum (100 MHz, 298 K) in  $\text{C}_6\text{D}_6$ ; aromatic region

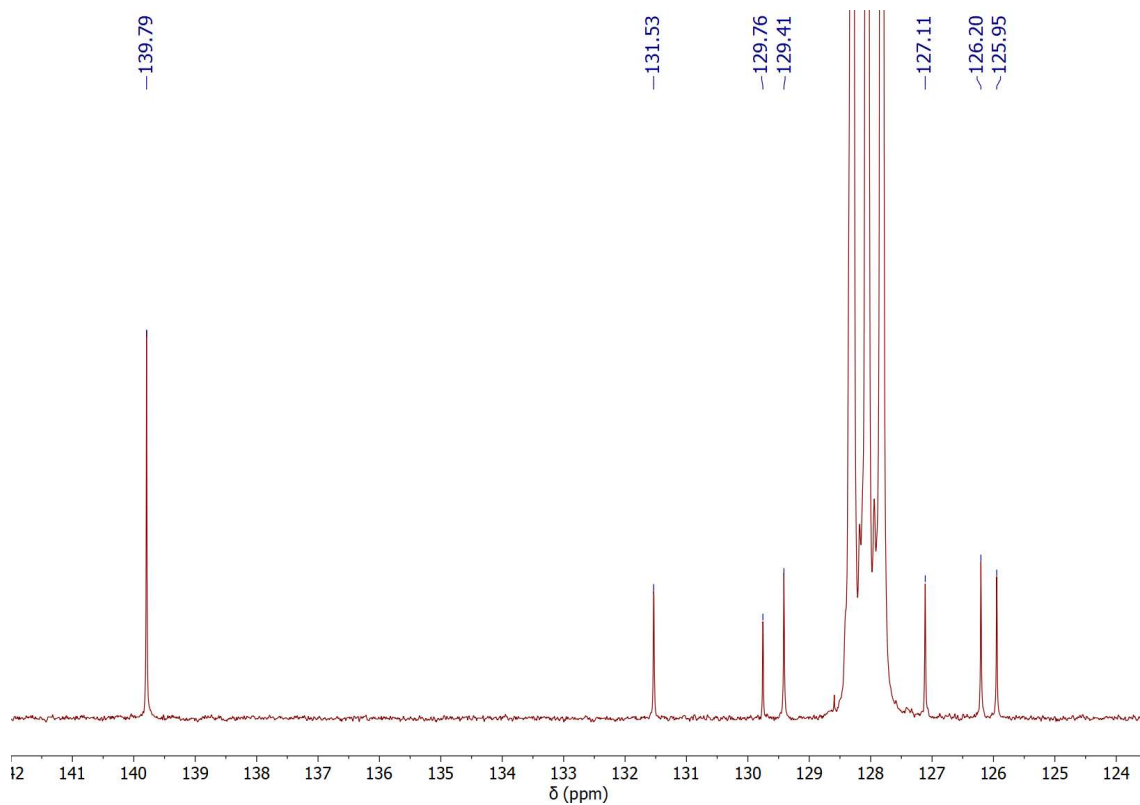

$^{13}\text{C}\{^1\text{H}\}$  NMR (JMOD) spectrum (100 MHz, 298 K) in  $\text{C}_6\text{D}_6$ ; aliphatic region

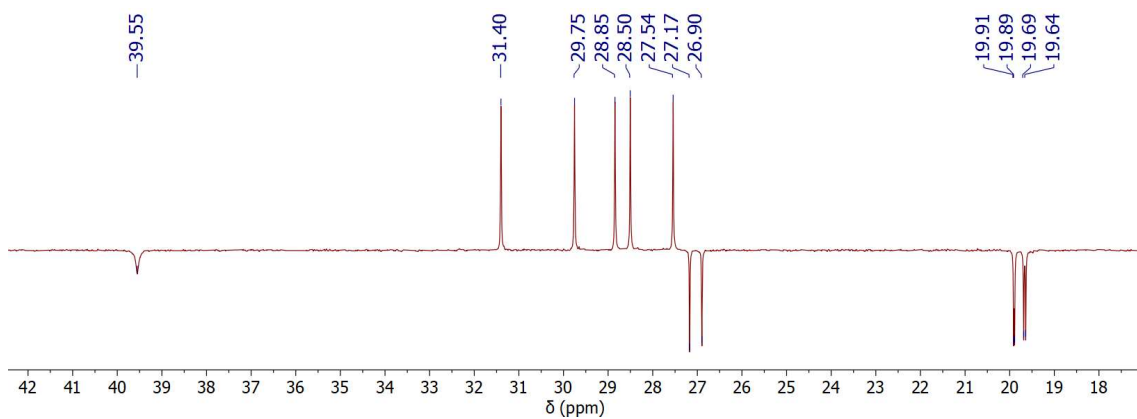

$^{13}\text{C}\{^1\text{H};^{31}\text{P}\}$  NMR (JMOD) spectrum (100 MHz, 298 K) in  $\text{C}_6\text{D}_6$ ; aliphatic region

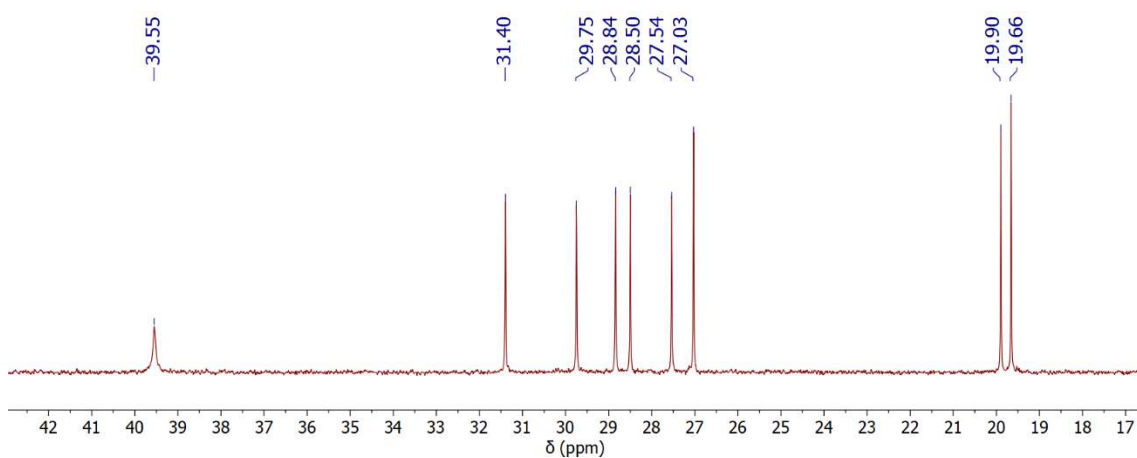

HSQC NMR (100 MHz, 298 K) in  $\text{C}_6\text{D}_6$ ; aromatic region

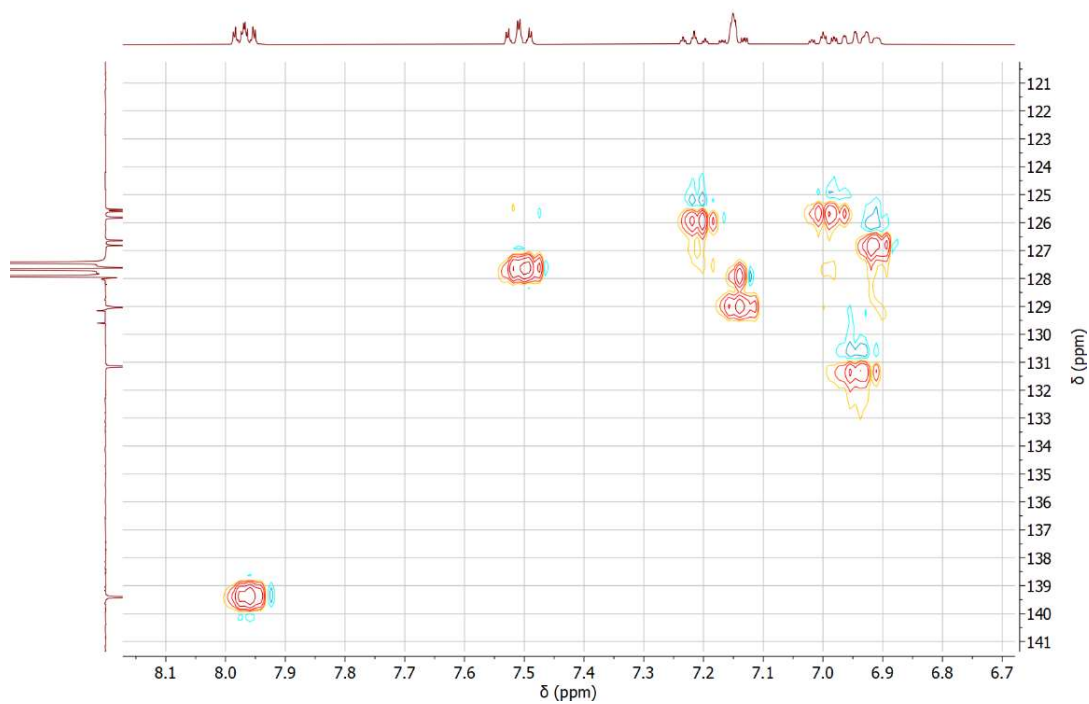

HSQC NMR (100 MHz, 298 K) in C<sub>6</sub>D<sub>6</sub>; aliphatic region

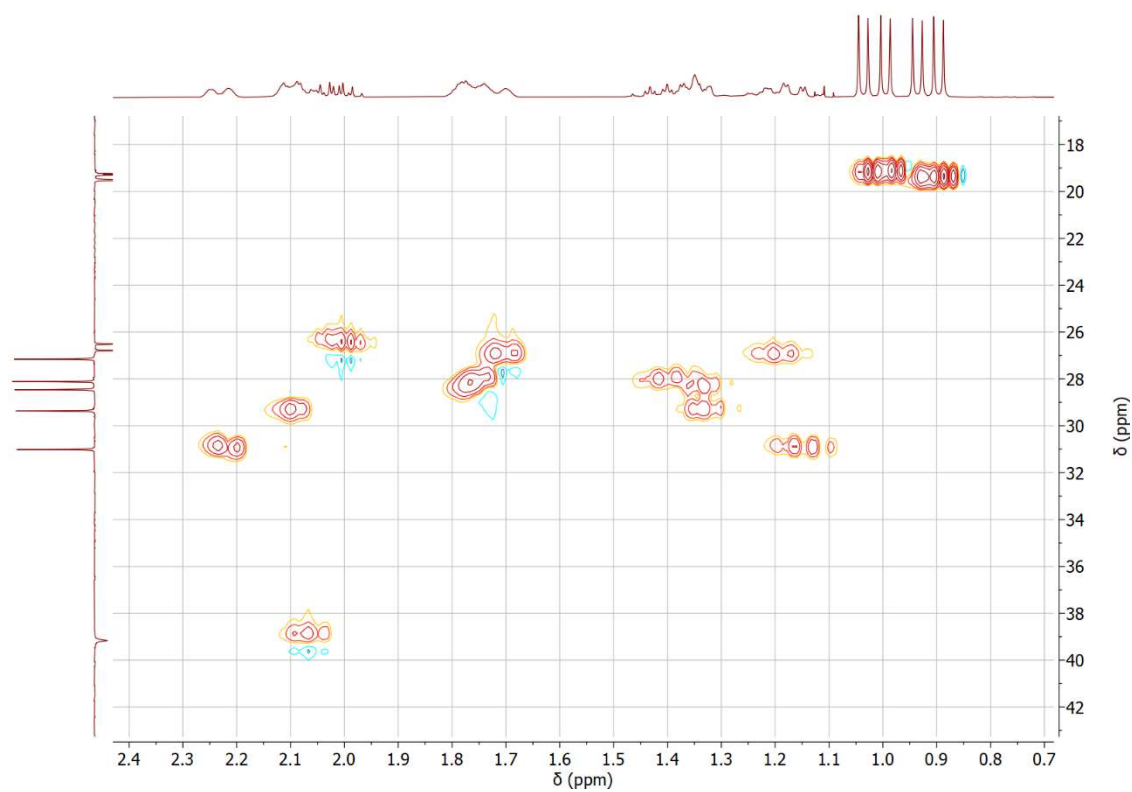

<sup>31</sup>P{<sup>1</sup>H} NMR spectrum (162 MHz, 298 K) in C<sub>6</sub>D<sub>6</sub>

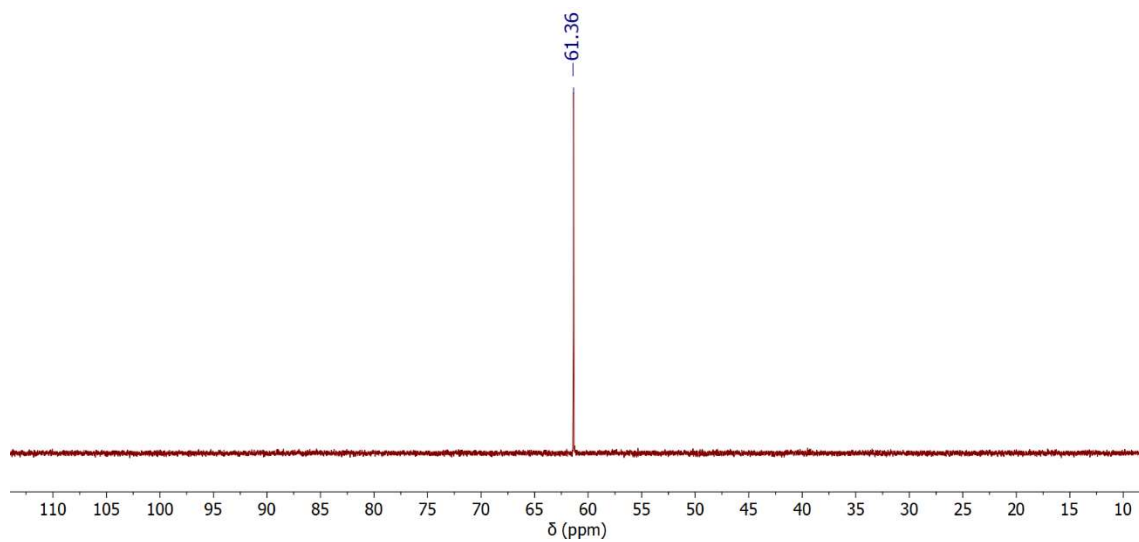



## Synthesis of digold complex A

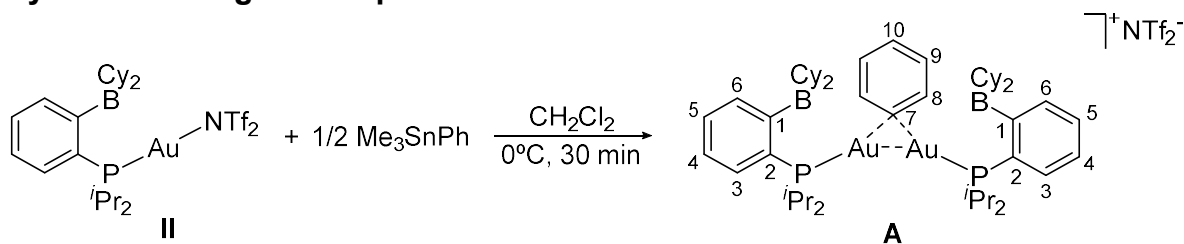

### From Me<sub>3</sub>SnPh:

A solution of Me<sub>3</sub>SnPh (6 μL, 0.030 mmol, 0.5 Equiv.) in 5 mL of CH<sub>2</sub>Cl<sub>2</sub> was added at 0 °C to a solution of compound II (50 mg, 0.059 mmol, 1 Equiv.) in 5 mL of CH<sub>2</sub>Cl<sub>2</sub>. The reaction mixture was stirred for 30 min at that temperature and after 30 min at room temperature, it was filtered to remove solid impurities. The volatiles were removed under vacuum to yield complex A (57 mg, 61%). X-Ray quality crystals of A were obtained by crystallization of saturated solution of Et<sub>2</sub>O overnight at -30 °C. M.p.= 73.6 °C (decomposition).

<sup>1</sup>H NMR (400 MHz, 298 K, CD<sub>2</sub>Cl<sub>2</sub>) δ 8.02-7.99 (m, 2H, H<sub>8</sub>), 7.79 (m, 3H, H<sub>9</sub>, H<sub>10</sub>), 7.55 – 7.47 (m, 4H, H<sub>4</sub>, H<sub>5</sub>), 7.44 – 7.39 (m, 2H, H<sub>3</sub>), 6.90 (dm, <sup>3</sup>J<sub>H-H</sub> = 7.6 Hz, 2H, H<sub>6</sub>), 2.68 (septd, <sup>3</sup>J<sub>H-H</sub> = 7.0, <sup>2</sup>J<sub>H-P</sub> = 8 Hz, 4H, CH<sub>iPr</sub>), 1.80 – 1.75 (m, 8H, CH<sub>2Cy</sub>), 1.70 – 1.66 (m, 4H, CH<sub>2Cy</sub>), 1.59 – 1.56 (m, 8H, CH<sub>2Cy</sub>), 1.41 (dd, <sup>3</sup>J<sub>H-H</sub> = 7, <sup>3</sup>J<sub>H-P</sub> = 18.9 Hz, 12H, CH<sub>3iPr</sub>), 1.38 – 1.30 (m, 6H, CH<sub>Cy</sub>, CH<sub>2Cy</sub>), 1.22 (dd, <sup>3</sup>J<sub>H-H</sub> = 7, <sup>3</sup>J<sub>H-P</sub> = 18.9 Hz, 12H, CH<sub>3iPr</sub>), 1.22 – 0.96 (m, 14H, CH<sub>2Cy</sub>), 0.87 – 0.77 (m, 4H, CH<sub>2Cy</sub>).

<sup>13</sup>C{<sup>1</sup>H} NMR (100 MHz, 298 K, CD<sub>2</sub>Cl<sub>2</sub>) δ 156.3 (d, <sup>2</sup>J<sub>C-P</sub> = 21 Hz, C<sub>1</sub>), 150.3 (s, C<sub>8</sub>), 145.7 (t, <sup>2</sup>J<sub>C-P</sub> = 49 Hz, C<sub>7</sub>), 138.3 (s, C<sub>10</sub>), 131.9 (s, C<sub>4</sub>), 130.3 (s, C<sub>5</sub>), 129.4 (s, C<sub>9</sub>), 126.6 (d, <sup>2</sup>J<sub>C-P</sub> = 9 Hz, C<sub>3</sub>), 125.6 (d, <sup>3</sup>J<sub>C-P</sub> = 18 Hz, C<sub>6</sub>), 124.4 (d, <sup>1</sup>J<sub>C-P</sub> = 52 Hz, C<sub>2</sub>), 120.0 (q, <sup>1</sup>J<sub>C-F</sub> = 323 Hz, CF<sub>3</sub>), 39.8 (sbr, B-CH<sub>Cy</sub>), 30.8 (s, CH<sub>2Cy</sub>), 28.3 (s, CH<sub>2Cy</sub>), 27.8 (s, CH<sub>2Cy</sub>), 27.7 (d, <sup>1</sup>J<sub>C-P</sub> = 32 Hz, CH<sub>iPr</sub>), 27.4 (s, CH<sub>2Cy</sub>), 26.6 (s, CH<sub>2Cy</sub>), 20.2 (s, CH<sub>3iPr</sub>), 19.3 (s, CH<sub>3iPr</sub>).

<sup>31</sup>P{<sup>1</sup>H} NMR (162 MHz, 298 K, CD<sub>2</sub>Cl<sub>2</sub>) δ 57.4.

<sup>19</sup>F{<sup>1</sup>H} NMR (282 MHz, 298 K, CD<sub>2</sub>Cl<sub>2</sub>) δ -79.5.

<sup>11</sup>B{<sup>1</sup>H} NMR (128 MHz, 298 K, CD<sub>2</sub>Cl<sub>2</sub>) δ Not detected.

HRMS-DCI(CH<sub>4</sub>) (*m/z*): found [M]<sup>+</sup> 1211.5659, calcd. C<sub>54</sub>H<sub>85</sub>Au<sub>2</sub><sup>11</sup>BP<sub>2</sub> requires 1211.5644.

## Alternative procedures from Ph<sub>2</sub>Zn or complex III

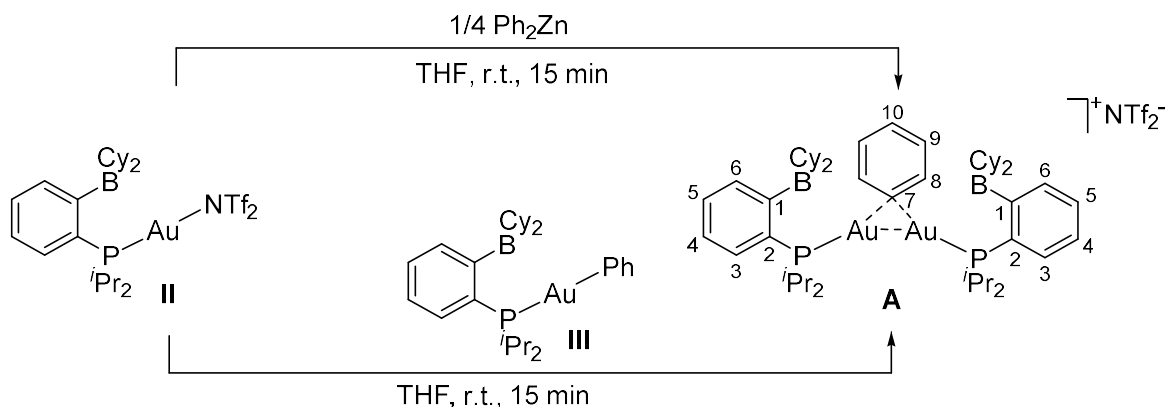

### From Ph<sub>2</sub>Zn:

To a solution of **II** (8.5 mg, 0.010 mmol, 1 Equiv.) in 0.4 mL of THF in NMR tube was added 0.1 mL of a solution of ZnPh<sub>2</sub> in THF (25 mM, 0.25 Equiv.). <sup>31</sup>P NMR indicates the major formation of complex **A** (88%) along with complex **III** (12 %).

### From complex III:

To a solution of complex **II** (20 mg, 0.024 mmol, 1 Equiv.) in THF (0.6 mL) in NMR tube was added complex **III** (14 mg, 0.024 mmol, 1 Equiv.) at room temperature. After 15 minutes, <sup>31</sup>P NMR indicates full conversion of **II** and **III** into **A**.

$^1\text{H}$  NMR spectrum (400 MHz, 298 K) in  $\text{CD}_2\text{Cl}_2$

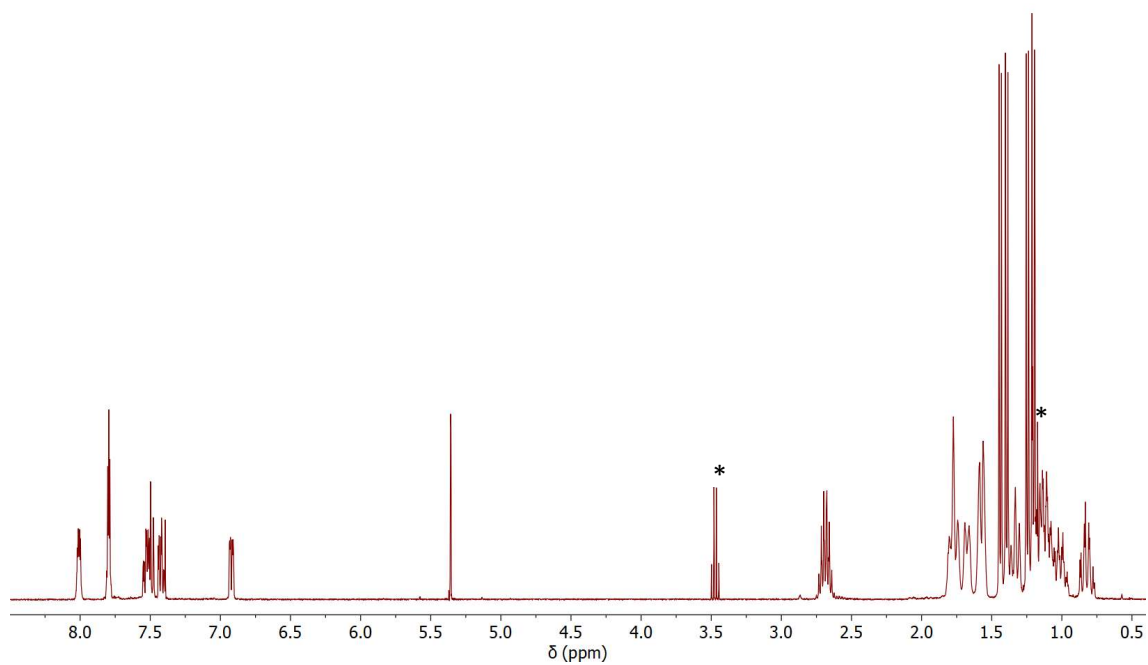

\*  $\text{Et}_2\text{O}$

$^1\text{H}\{^{31}\text{P}\}$  NMR spectrum (400 MHz, 298 K) in  $\text{CD}_2\text{Cl}_2$

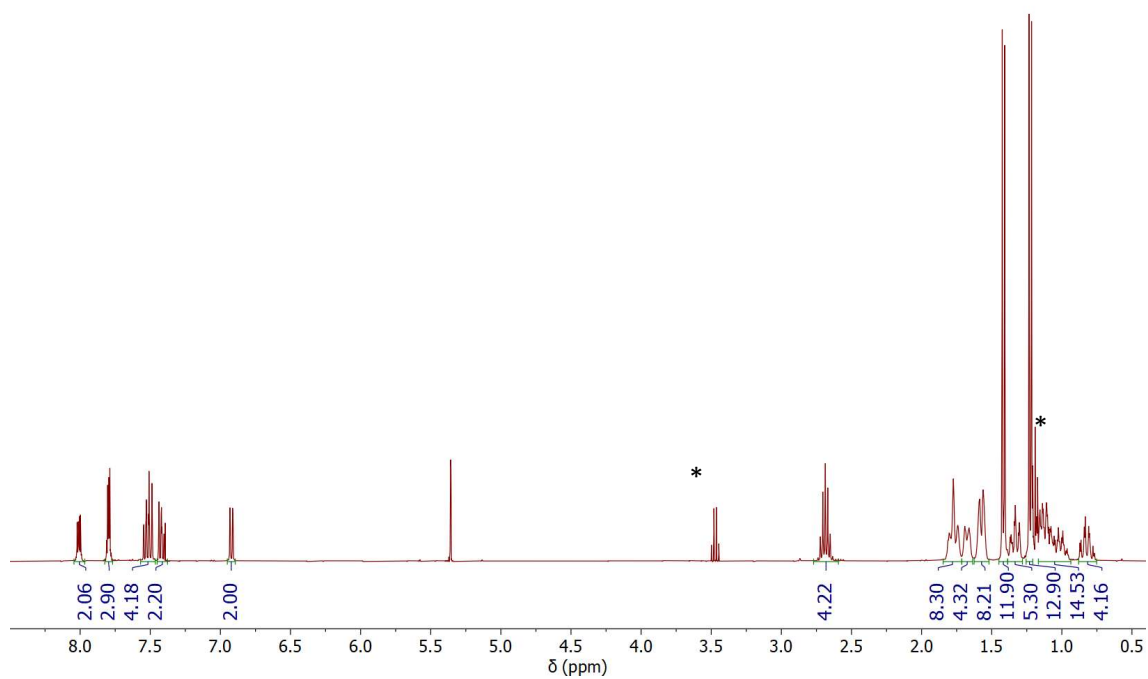

\*  $\text{Et}_2\text{O}$

$^1\text{H}$  NMR spectrum (400 MHz, 298 K) in  $\text{CD}_2\text{Cl}_2$ ; aromatic region

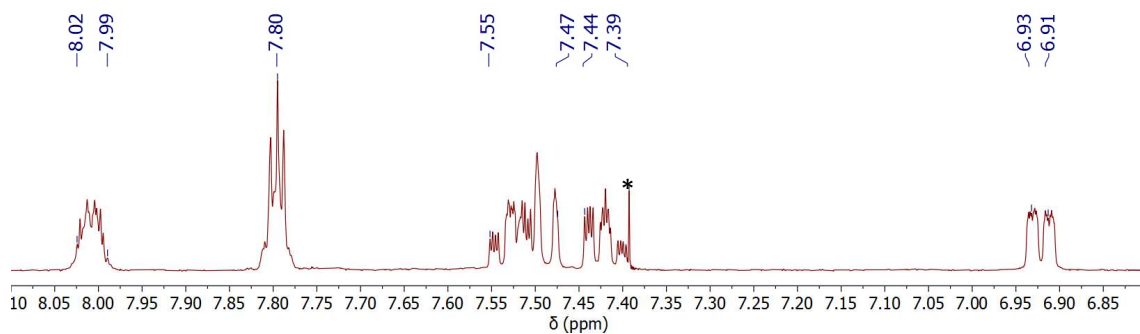

\* Unidentified minor impurity.

$^1\text{H}$  NMR spectrum (400 MHz, 298 K) in  $\text{CD}_2\text{Cl}_2$ ; aliphatic region

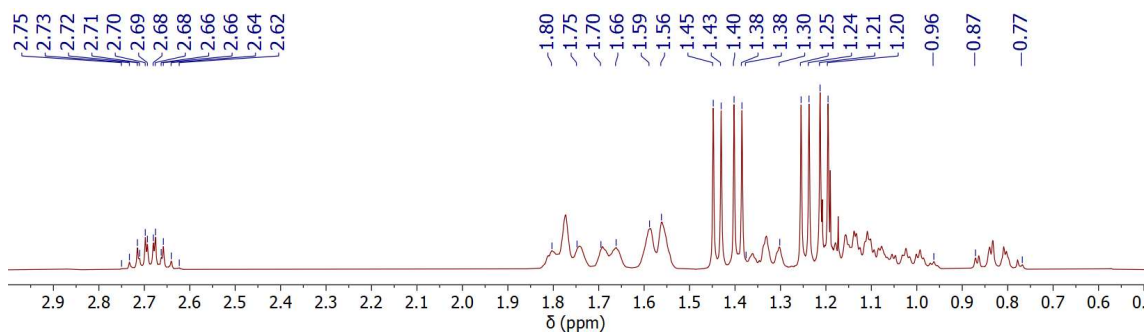

$^1\text{H}\{^3\text{P}\}$  NMR spectrum (400 MHz, 298 K) in  $\text{CD}_2\text{Cl}_2$ ; aliphatic region

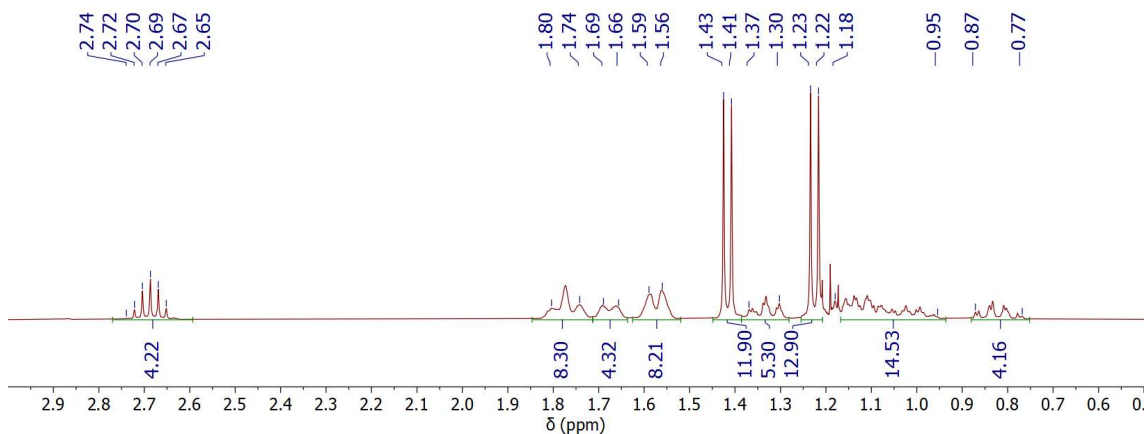

$^{13}\text{C}\{^1\text{H}\}$  NMR (JMOD) spectrum (100 MHz, 298 K) in  $\text{CD}_2\text{Cl}_2$

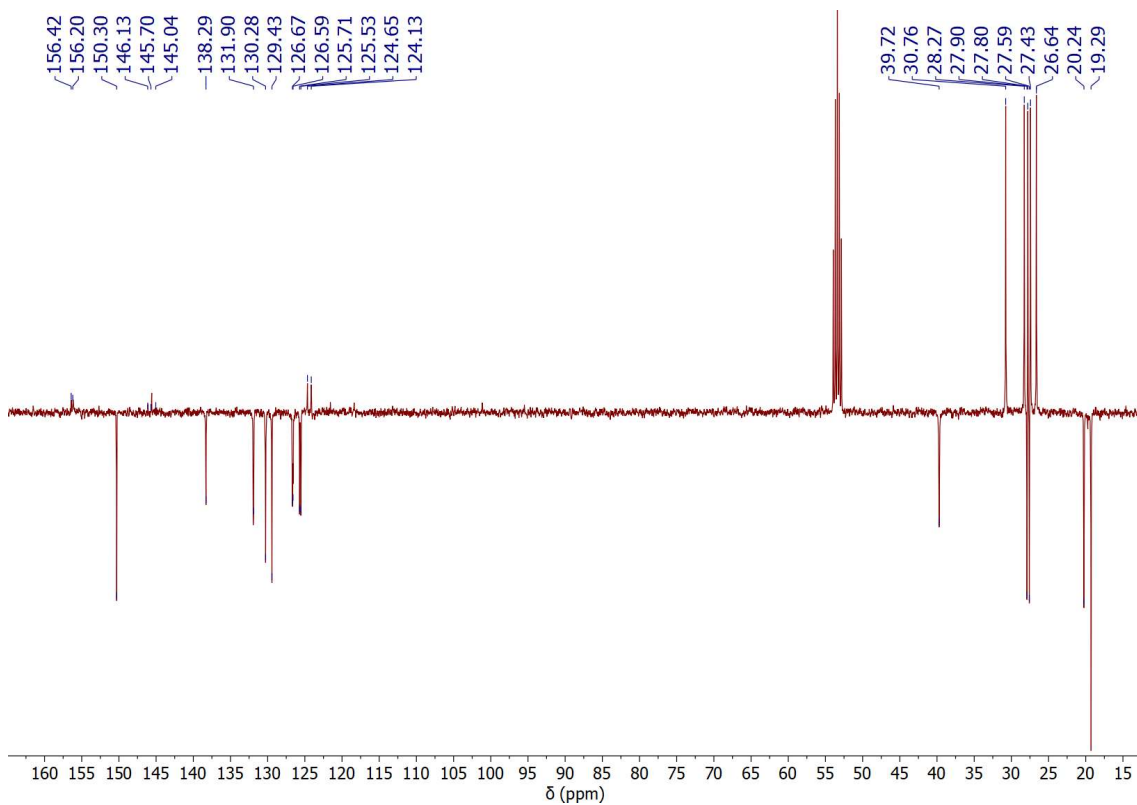

$^{13}\text{C}\{^1\text{H};^{31}\text{P}\}$  NMR spectrum (100 MHz, 298 K) in  $\text{CD}_2\text{Cl}_2$

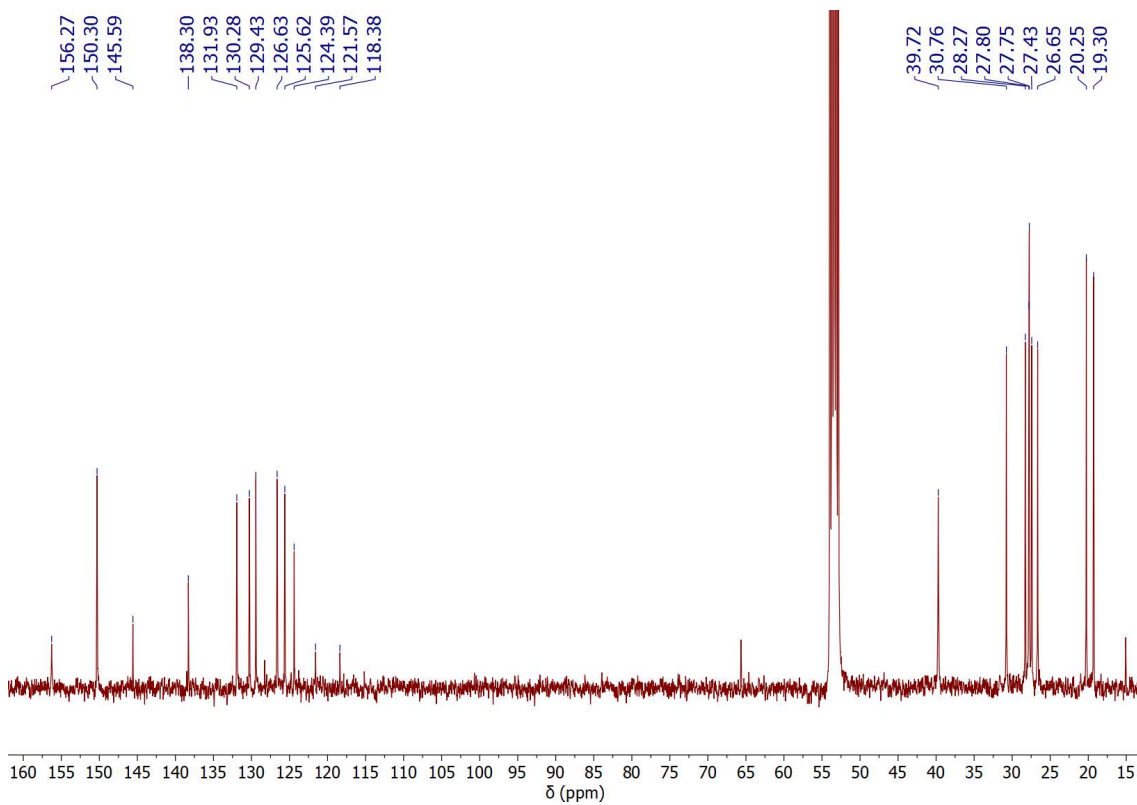

$^{13}\text{C}\{^1\text{H}\}$  NMR (JMOD) spectrum (100 MHz, 298 K) in  $\text{CD}_2\text{Cl}_2$ ; aromatic region

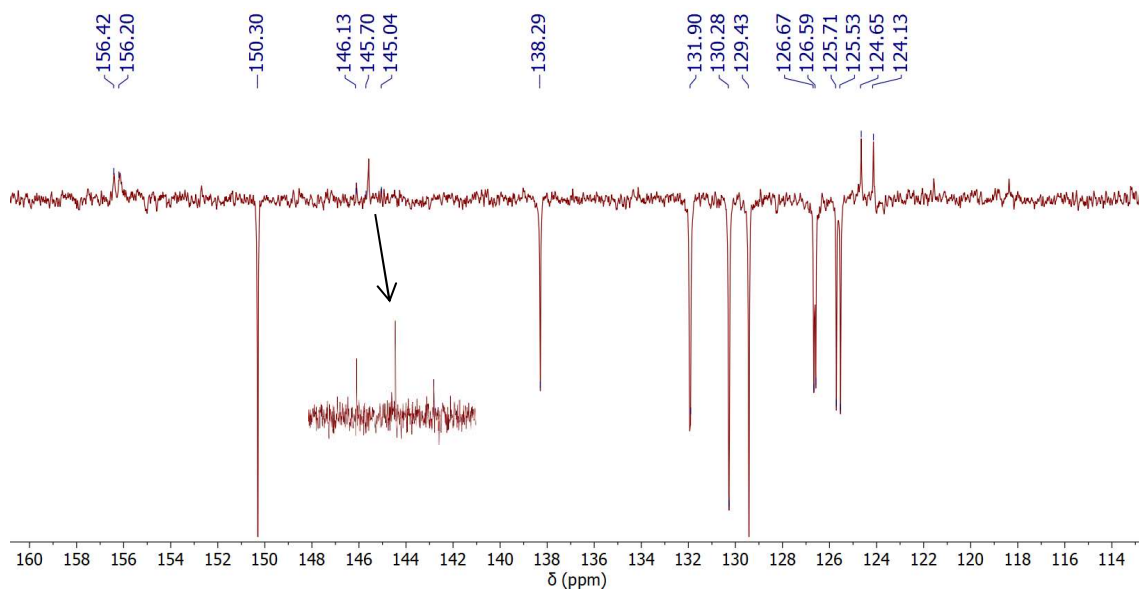

$^{13}\text{C}\{^1\text{H};^{31}\text{P}\}$  NMR spectrum (100 MHz, 298 K) in  $\text{CD}_2\text{Cl}_2$ ; aromatic region

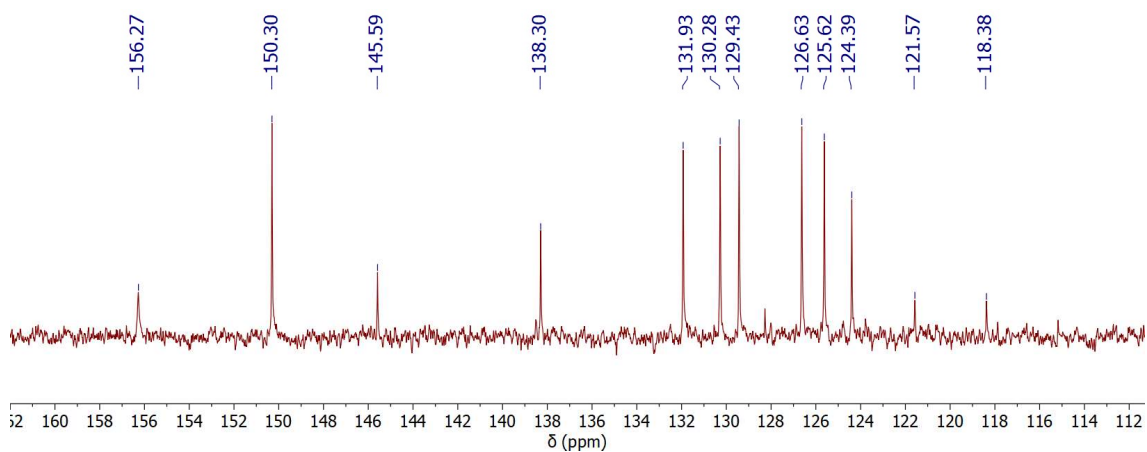

$^{13}\text{C}\{^1\text{H}\}$  NMR (JMOD) spectrum (100 MHz, 298 K) in  $\text{CD}_2\text{Cl}_2$ ; aliphatic region

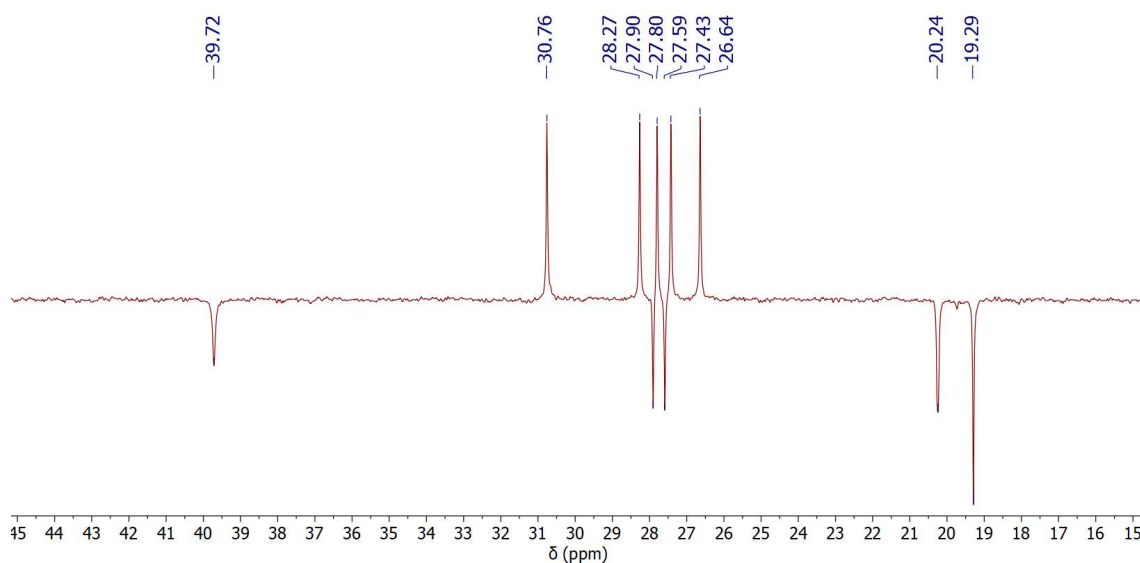

$^{13}\text{C}\{^1\text{H};^{31}\text{P}\}$  NMR spectrum (100 MHz, 298 K) in  $\text{CD}_2\text{Cl}_2$ ; aliphatic region

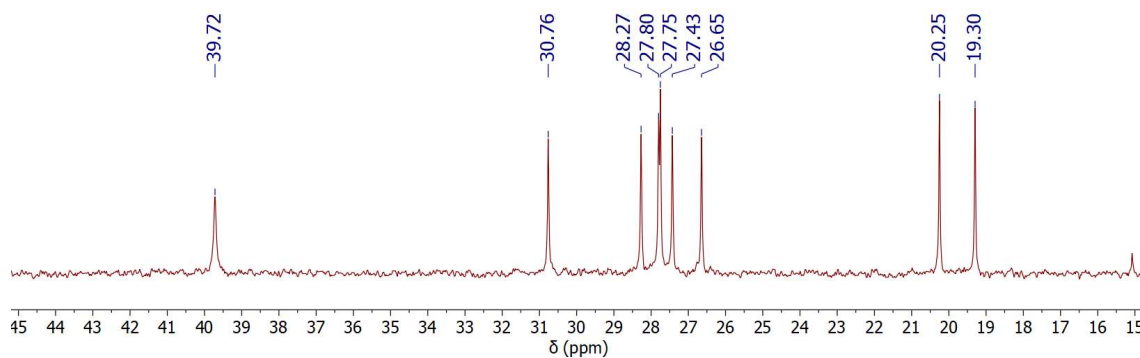

HSQC NMR (100 MHz, 298 K) in  $\text{CD}_2\text{Cl}_2$ ; aliphatic region

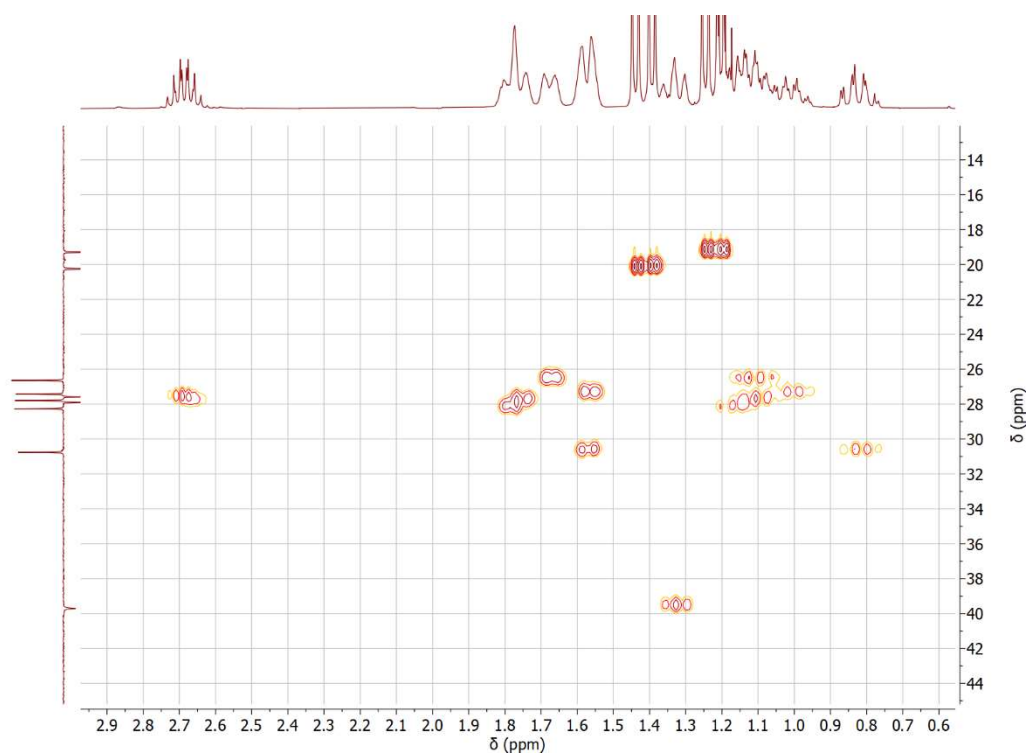

$^{31}\text{P}\{^1\text{H}\}$  NMR spectrum (162 MHz, 298 K) in  $\text{CD}_2\text{Cl}_2$

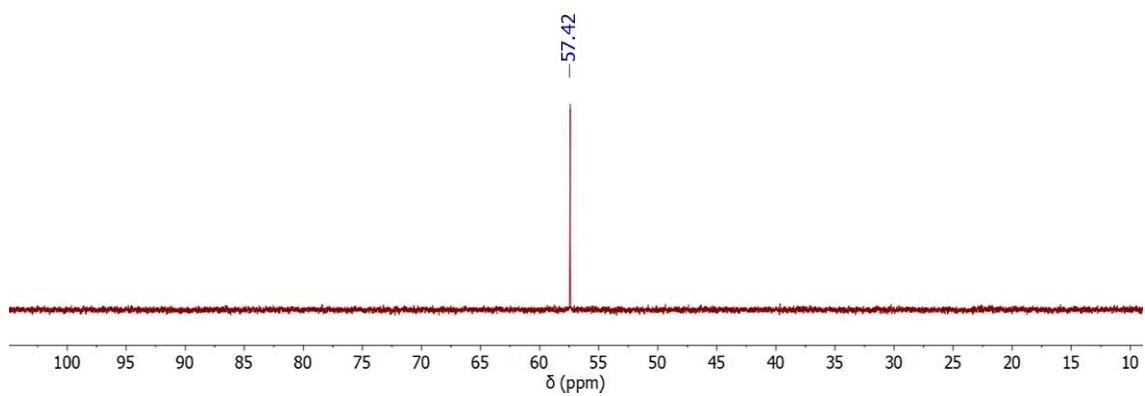

$^{19}\text{F}\{^1\text{H}\}$  NMR spectrum (282 MHz, 298 K) in  $\text{CD}_2\text{Cl}_2$

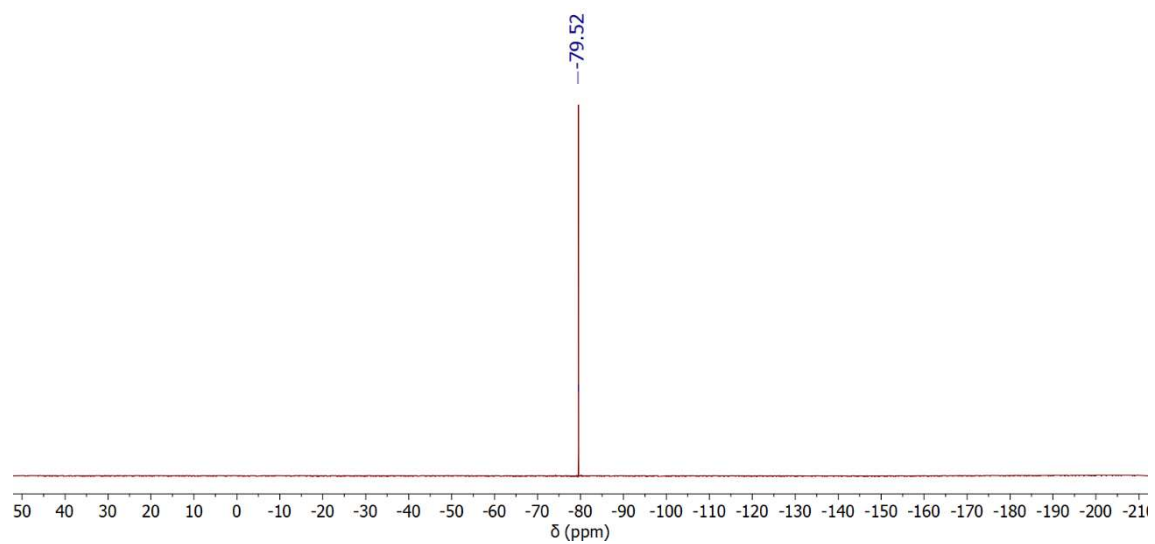



## Synthesis of digold complex **B**

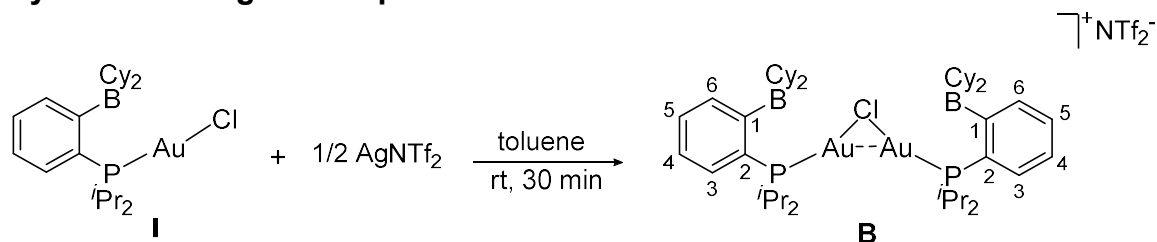

0.5 equivalent of  $\text{AgNTf}_2$  (16 mg, 0.041 mmol, 0.5 Equiv.) was added to a solution of  $\text{PBCy}_2\text{AuCl}$  **I** (50 mg, 0.083 mmol, 1 Equiv.) in toluene (5 ml) at room temperature. After 30 min, the reaction was filtered over celite to remove  $\text{AgCl}$ . The solvent was removed under vacuum to obtain a white powder (70 mg, 58%). X-Ray quality crystals were grown by diffusion of pentane into  $\text{Et}_2\text{O}$  solution of **B** (1:2 by vol.) at  $-30\text{ }^\circ\text{C}$ . M.p. =  $74.8\text{ }^\circ\text{C}$  (decomposition).

$^1\text{H}$  NMR (500 MHz, 298 K,  $\text{C}_6\text{D}_6$ )  $\delta$  7.09 (pseudo-tdd,  $^3J_{\text{H-H}} = 7.6$ ,  $^4J_{\text{H-H}} = 1.2$ ,  $^5J_{\text{H-P}} = 2.4$  Hz, 2H,  $\text{H}_5$ ), 6.90 (pseudo-tdd,  $^3J_{\text{H-H}} = 7.6$ ,  $^4J_{\text{H-H}} = 1.2$ ,  $^4J_{\text{H-P}} = 2.4$  Hz, 2H,  $\text{H}_4$ ), 6.80 (dbr,  $^3J_{\text{H-H}} = 7.6$  Hz, 2H,  $\text{H}_6$ ), 6.75 (pseudo-tbr,  $^3J_{\text{H-H}} = ^3J_{\text{H-P}} = 7.6$  Hz, 2H,  $\text{H}_3$ ), 2.38 – 2.22 (m, 4H,  $\text{CH}_2\text{Cy}$ ), 2.19 – 2.14 (m, 4H,  $\text{B-CH}_\text{Cy}$ ), 2.10 – 1.98 (m, 4H,  $\text{CH}_2\text{Cy}$ ), 1.87 – 1.81 (m, 4H,  $\text{CH}_2\text{Cy}$ ), 1.80 – 1.66 (m, 12H,  $\text{CH}_\text{IPr}$ ,  $\text{CH}_2\text{Cy}$ ), 1.51 – 1.38 (m, 8H,  $\text{CH}_2\text{Cy}$ ), 1.38 – 1.25 (m, 4H,  $\text{CH}_2\text{Cy}$ ), 1.25 – 1.04 (m, 8H,  $\text{CH}_2\text{Cy}$ ), 0.83 (dd,  $^3J_{\text{H-H}} = 7.0$ ,  $^3J_{\text{H-P}} = 18.6$  Hz, 12H,  $\text{CH}_\text{3IPr}$ ), 0.70 (dd,  $^3J_{\text{H-H}} = 7.0$ ,  $^3J_{\text{H-P}} = 17.5$  Hz, 6H,  $\text{CH}_\text{3IPr}$ ).

$^{13}\text{C}\{^1\text{H}\}$  NMR (100 MHz, 298 K,  $\text{C}_6\text{D}_6$ )  $\delta$  157.9 (s,  $\text{C}_1$  or  $\text{C}_2$ ),\* 130.7 (d,  $^2J_{\text{C-P}} = 6$  Hz, s,  $\text{C}_3$ ), 129.8 (d,  $^4J_{\text{C-P}} = 2$  Hz,  $\text{C}_5$ ), 126.5 (d,  $^3J_{\text{C-P}} = 18$  Hz,  $\text{C}_6$ ), 125.7 (d,  $^3J_{\text{C-P}} = 8$  Hz,  $\text{C}_4$ ), 120.2 (q,  $^1J_{\text{C-F}} = 323$  Hz,  $\text{CF}_3$ ), 39.3 (s,  $\text{CH}_\text{Cy}$ ), 30.9 (s,  $\text{CH}_2\text{Cy}$ ), 28.9 (s,  $\text{CH}_2\text{Cy}$ ), 28.2 (s,  $\text{CH}_2\text{Cy}$ ), 27.6 (s,  $\text{CH}_2\text{Cy}$ ), 27.1 (d,  $^1J_{\text{C-P}} = 35$  Hz,  $\text{CH}_\text{IPr}$ ), 26.9 (s,  $\text{CH}_2\text{Cy}$ ), 19.1 (d,  $^2J_{\text{C-P}} = 3$  Hz,  $\text{CH}_\text{3IPr}$ ), 19.1 (s,  $\text{CH}_\text{3IPr}$ ). \*The quaternary carbon  $\text{C}_1$  and  $\text{C}_2$  are not visible, one of them was deduced from the HMBC spectrum.

$^{31}\text{P}\{^1\text{H}\}$  NMR (121 MHz, 298 K,  $\text{C}_6\text{D}_6$ )  $\delta$  54.6 (br).

$^{19}\text{F}\{^1\text{H}\}$  NMR (282 MHz, 298 K,  $\text{C}_6\text{D}_6$ )  $\delta$  -73.8.

$^{11}\text{B}\{^1\text{H}\}$  NMR (160 MHz, 298 K,  $\text{C}_6\text{D}_6$ )  $\delta$  Not detected.

HRMS-DCI( $\text{CH}_4$ ) ( $m/z$ ): found  $[\text{M}]^+$  1169.5007, calcd.  $\text{C}_{48}\text{H}_{80}\text{Au}_2^{11}\text{B}_2\text{ClP}_2$  requires 1169.4941.

$^1\text{H}$  NMR spectrum (500 MHz, 298 K) in  $\text{C}_6\text{D}_6$

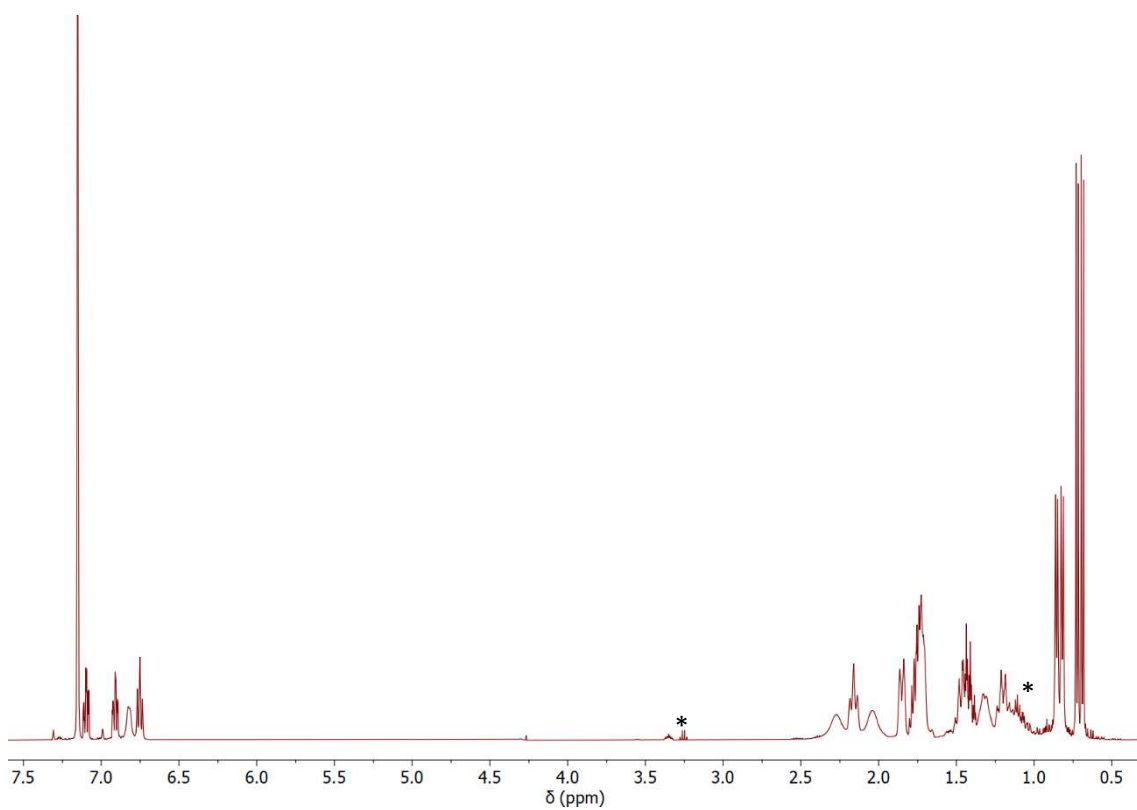

\*Et<sub>2</sub>O

$^1\text{H}\{^{31}\text{P}\}$  NMR spectrum (500 MHz, 298 K) in  $\text{C}_6\text{D}_6$

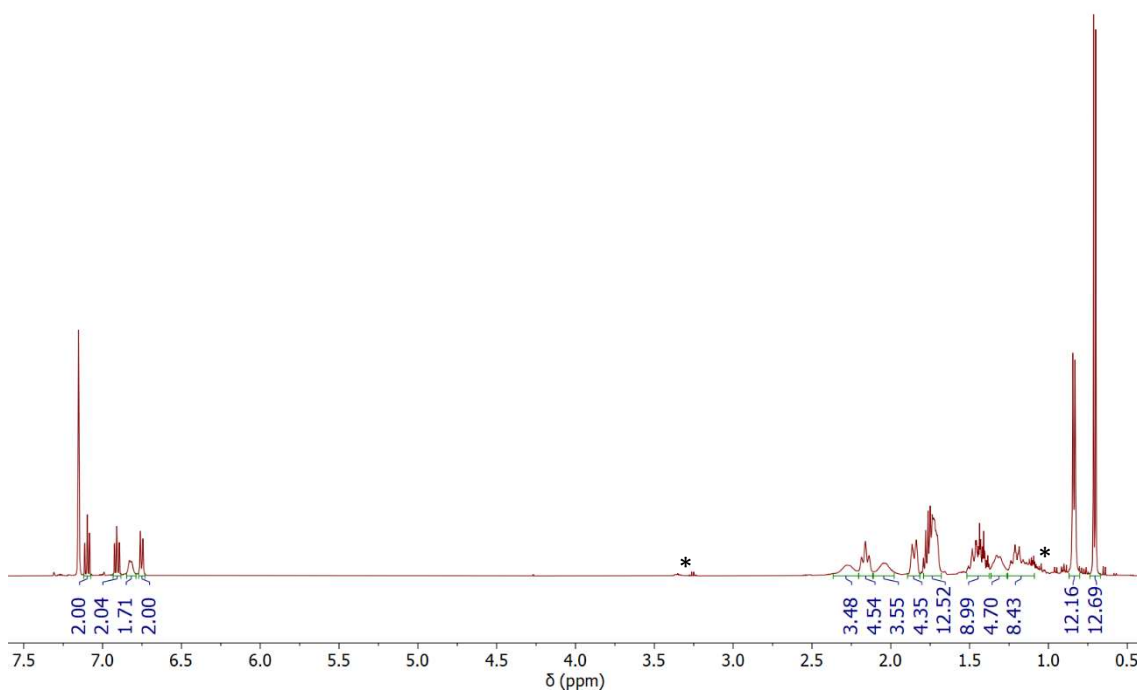

\*Et<sub>2</sub>O

$^1\text{H}$  NMR spectrum (500 MHz, 298 K) in  $\text{C}_6\text{D}_6$ ; aromatic region

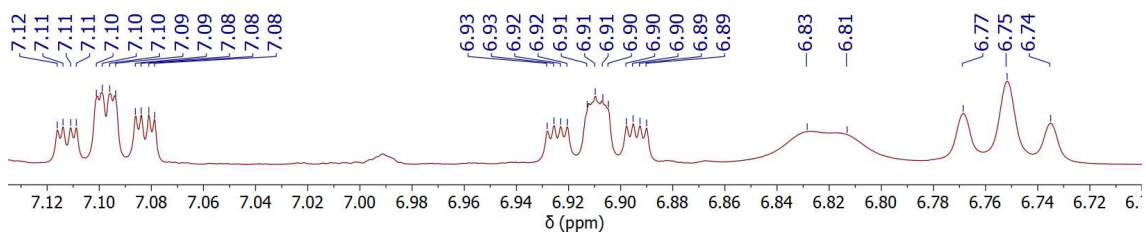

$^1\text{H}\{^{31}\text{P}\}$  NMR spectrum (500 MHz, 298 K) in  $\text{C}_6\text{D}_6$ ; aromatic region

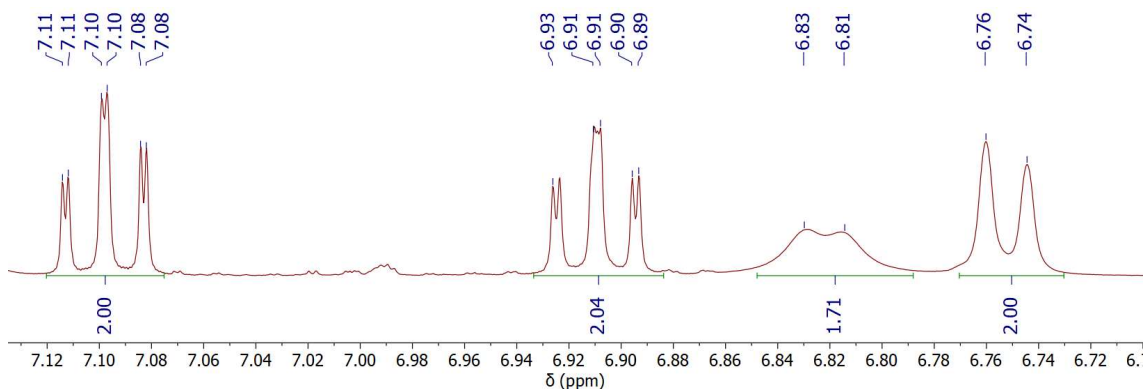

$^1\text{H}$  NMR spectrum (500 MHz, 298 K) in  $\text{C}_6\text{D}_6$ ; aliphatic region

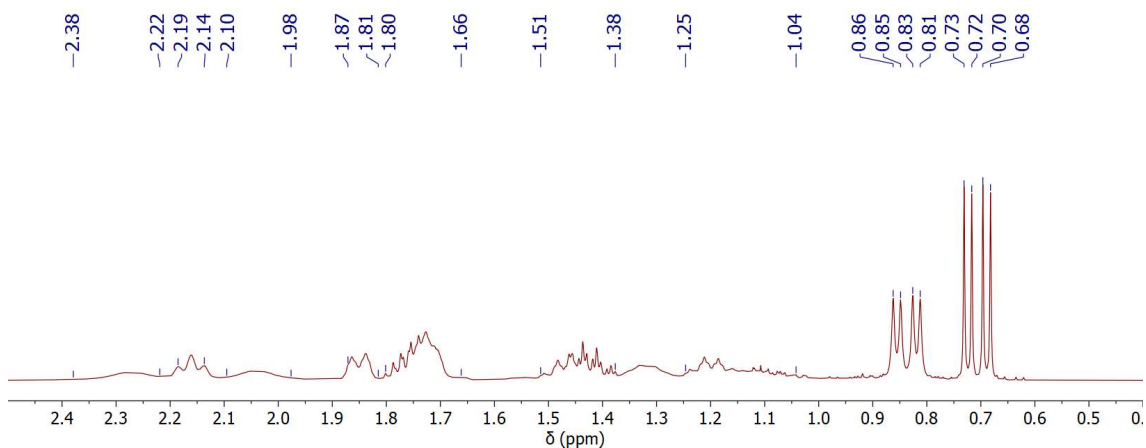

$^1\text{H}\{^{31}\text{P}\}$  NMR spectrum (500 MHz, 298 K) in  $\text{C}_6\text{D}_6$ ; aliphatic region

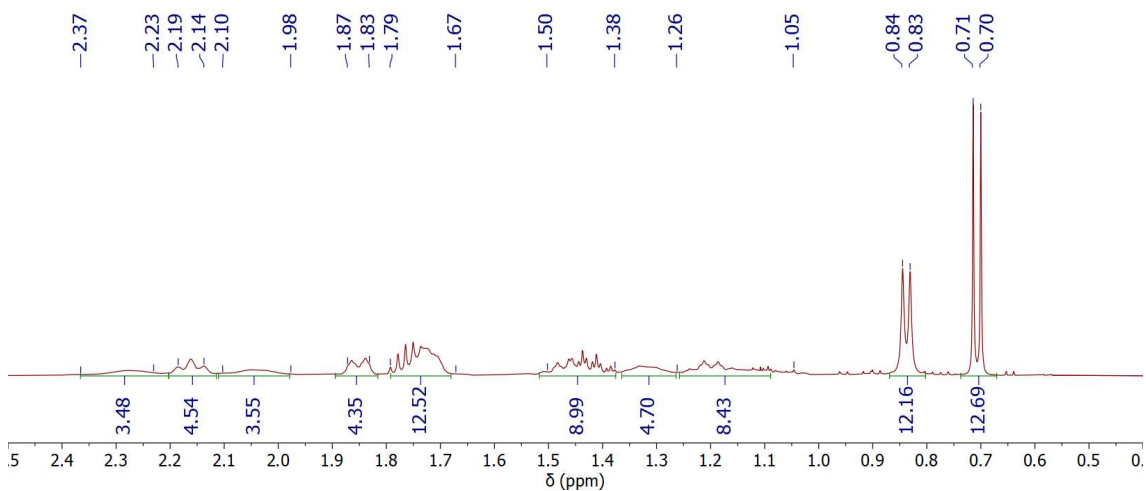

$^{13}\text{C}\{^1\text{H}\}$  NMR (JMOD) spectrum (100 MHz, 298 K) in  $\text{C}_6\text{D}_6$

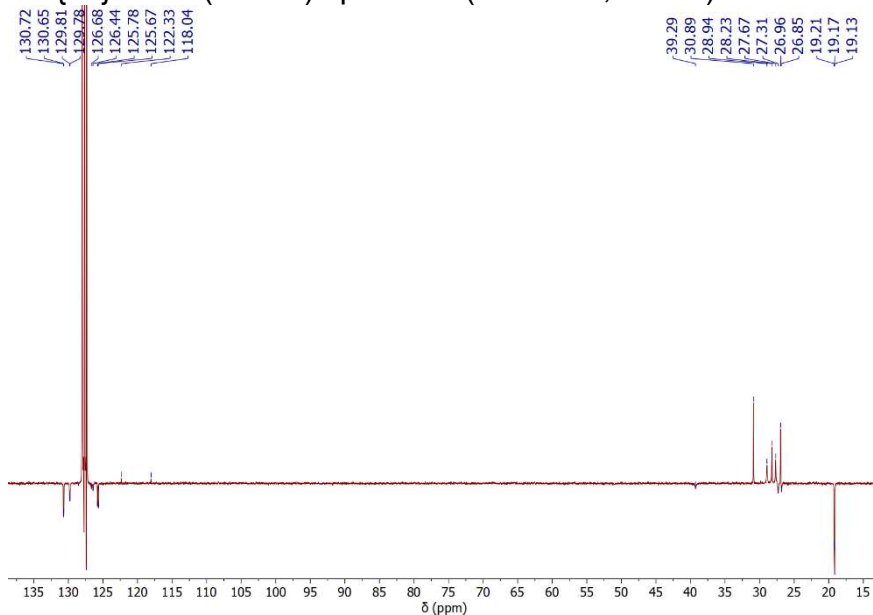

$^{13}\text{C}\{^1\text{H}\}$  NMR (JMOD) spectrum (100 MHz, 298 K) in  $\text{C}_6\text{D}_6$ ; aromatic region

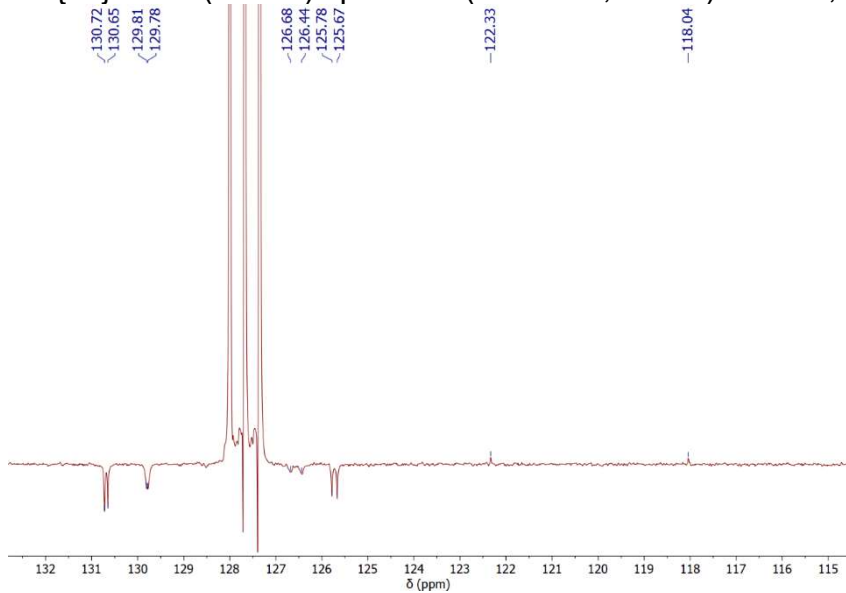

$^{13}\text{C}\{^1\text{H}\}$  NMR (JMOD) spectrum (100 MHz, 298 K) in  $\text{C}_6\text{D}_6$ ; aliphatic region

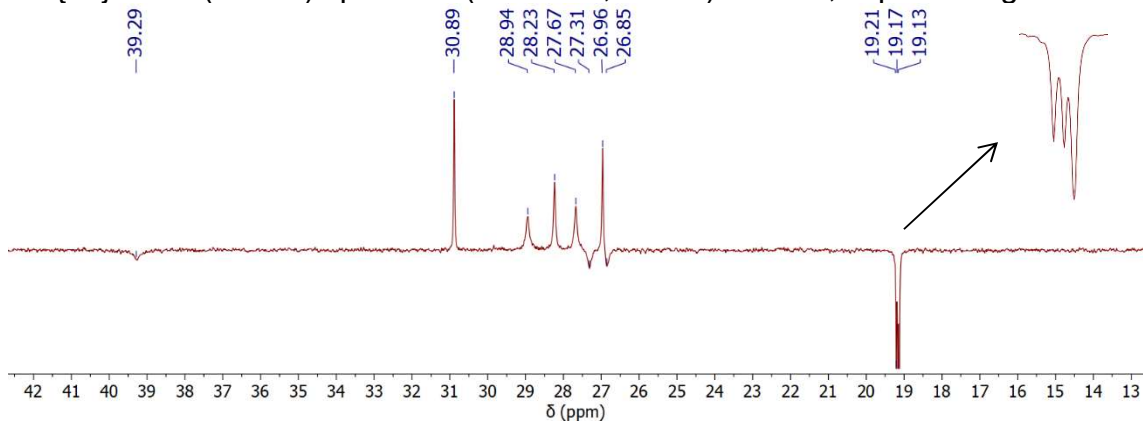

HMBC NMR spectrum (298 K) in C<sub>6</sub>D<sub>6</sub>

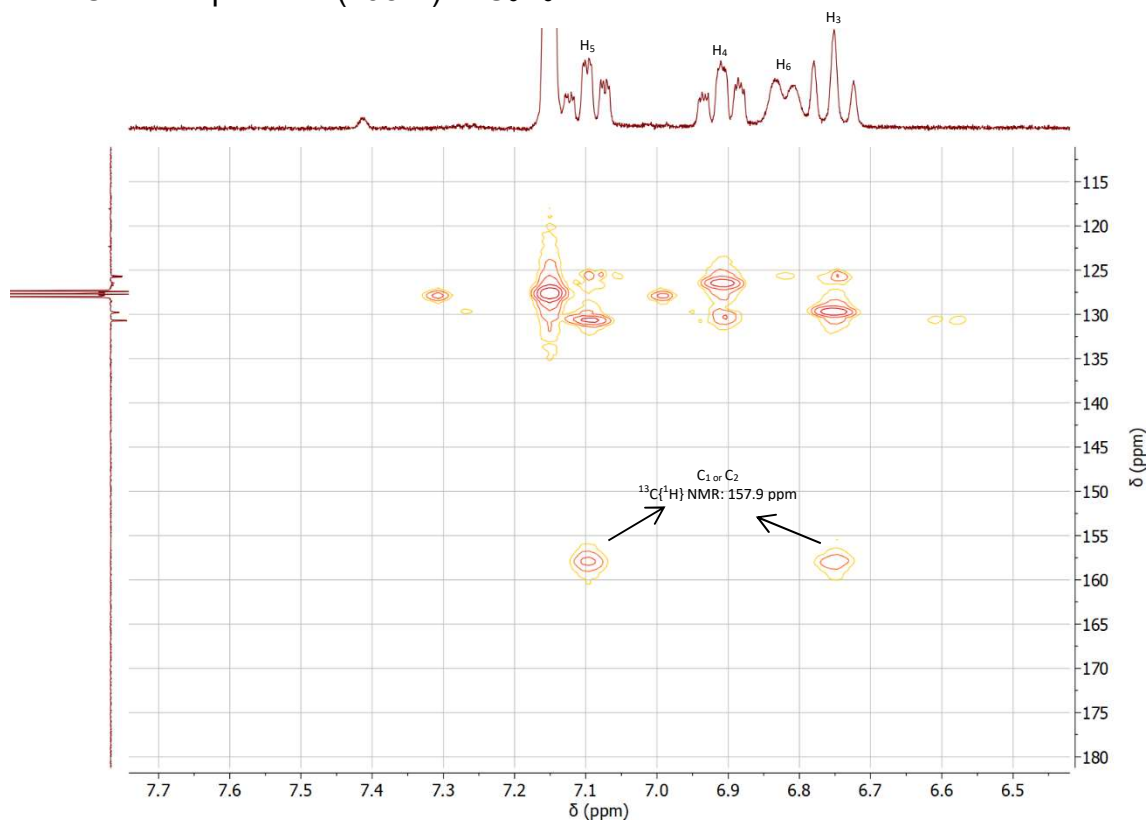

<sup>31</sup>P{<sup>1</sup>H} NMR spectrum (121 MHz, 298 K) in C<sub>6</sub>D<sub>6</sub>

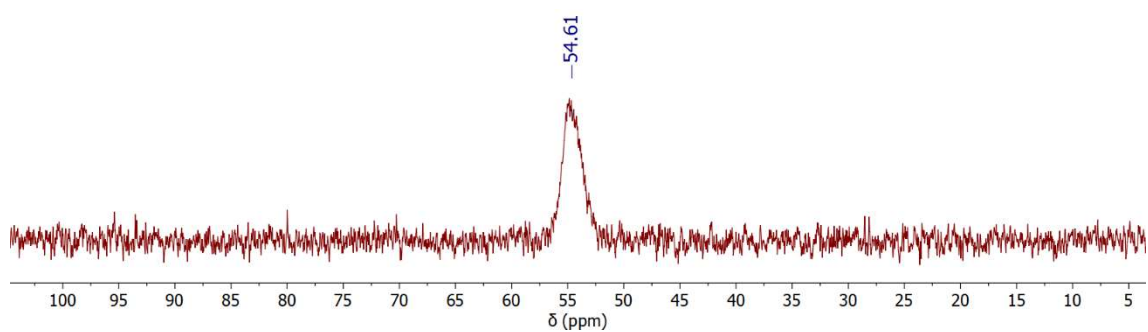

<sup>19</sup>F{<sup>1</sup>H} NMR spectrum (282 MHz, 298 K) in C<sub>6</sub>D<sub>6</sub>

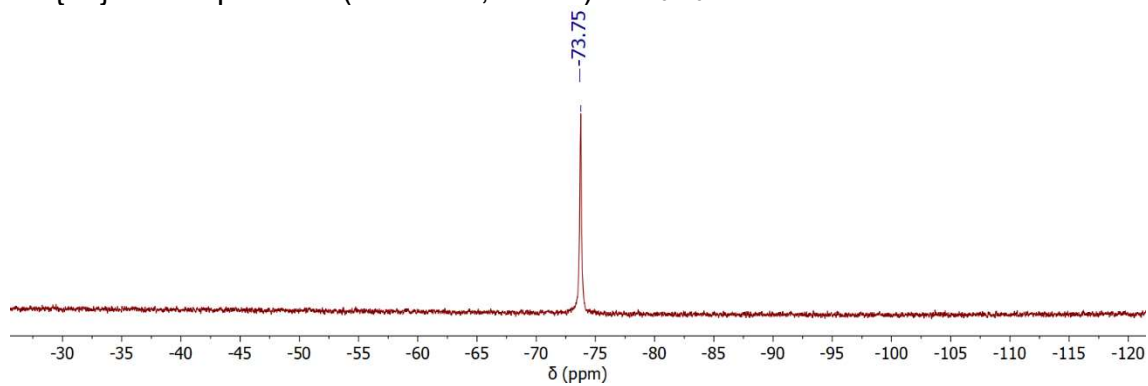

## General procedure for the synthesis of (PBMe<sub>2</sub>)AuNTf<sub>2</sub> and (PBpin)AuNTf<sub>2</sub>

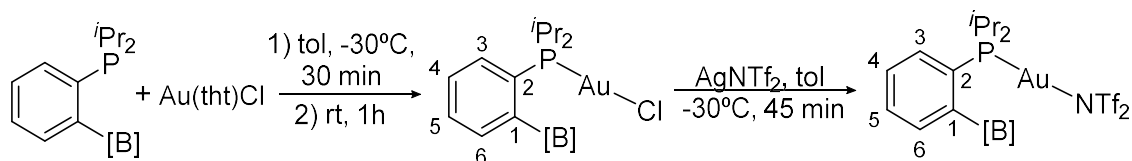

[B] = BMe<sub>2</sub>, Bpin

A solution of PB ligand (0.226 mmol, 1 Equiv.) in 5 mL of toluene was added to a solution of Au(tht)Cl (0.226 mmol, 1 Equiv.) in toluene (3 mL) at -30 °C. The reaction was stirred at that temperature for 30 min and 1 hour at room temperature and then, it was filtered to remove solid impurities and the supernatant was evaporated. To a solution of obtained PBAuCl (0.074 mmol, 1 Equiv.) in toluene (5 mL) was added AgNTf<sub>2</sub> (0.074 mmol, 1 Equiv.) in toluene (5 mL). The mixture covered with aluminium foil was stirred at -30 °C for 45 minutes. The solution was filtered to remove white precipitate of AgCl, and the volatiles were removed under vacuum to yield complex as white powder (~ 50%).

### PBMe<sub>2</sub>AuCl

<sup>1</sup>H NMR (500 MHz, 298 K, C<sub>6</sub>D<sub>6</sub>) δ 7.42 – 7.38 (m, 1H, CH<sub>Ar</sub>), 6.99 – 6.88 (m, 3H, CH<sub>Ar</sub>), 6.83 – 6.64 (brs, 2H, CH<sub>Mes</sub>), 2.96 – 2.51 (brs, 3H, CH<sub>3Mes</sub>), 2.12 (s, 6H, CH<sub>3Mes</sub>), 1.93 – 1.74 (brs, 2H, CH<sub>iPr</sub>), 0.94 – 0.66 (m, 12H CH<sub>3iPr</sub>).

<sup>13</sup>C{<sup>1</sup>H} NMR (100 MHz, 298 K, C<sub>6</sub>D<sub>6</sub>) δ 158.2 (d, <sup>1</sup>J<sub>C-P</sub> = 21 Hz, C<sub>ipso-P</sub>), 143.6 (br, C<sub>ipso-B</sub>), 140.7 (br, C<sub>Mes</sub>), 134.7 (d, J<sub>C-P</sub> = 14 Hz, C<sub>Ar</sub>), 133.0 (C<sub>Mes</sub>), 132.6 (C<sub>Mes</sub>), 132.3 (d, J<sub>C-P</sub> = 5 Hz, C<sub>Ar</sub>), 130.4 (d, J<sub>C-P</sub> = 3 Hz, C<sub>Ar</sub>), 129.9 (br, C<sub>Mes</sub>), 128.9 (d, J<sub>C-P</sub> = 8 Hz, C<sub>Ar</sub>), 20.9 (CH<sub>3Mes</sub>). CH<sub>3Mes</sub>, CH<sub>3iPr</sub> and CH<sub>iPr</sub> described the δ as broad signal and precise by \*confirmed by HSQC and not HMBC.

<sup>31</sup>P{<sup>1</sup>H} NMR (203 MHz, 298 K, C<sub>6</sub>D<sub>6</sub>) δ 53.1.

<sup>11</sup>B{<sup>1</sup>H} NMR (160 MHz, 298 K, C<sub>6</sub>D<sub>6</sub>) δ Not detected.

HRMS-DCI(CH<sub>4</sub>) (*m/z*): found [M]<sup>+</sup> 555.1470, calcd. C<sub>31</sub>H<sub>29</sub>Au<sup>11</sup>BCIP requires 555.1454.

$^1\text{H}$  NMR spectrum (500 MHz, 298 K) in  $\text{C}_6\text{D}_6$

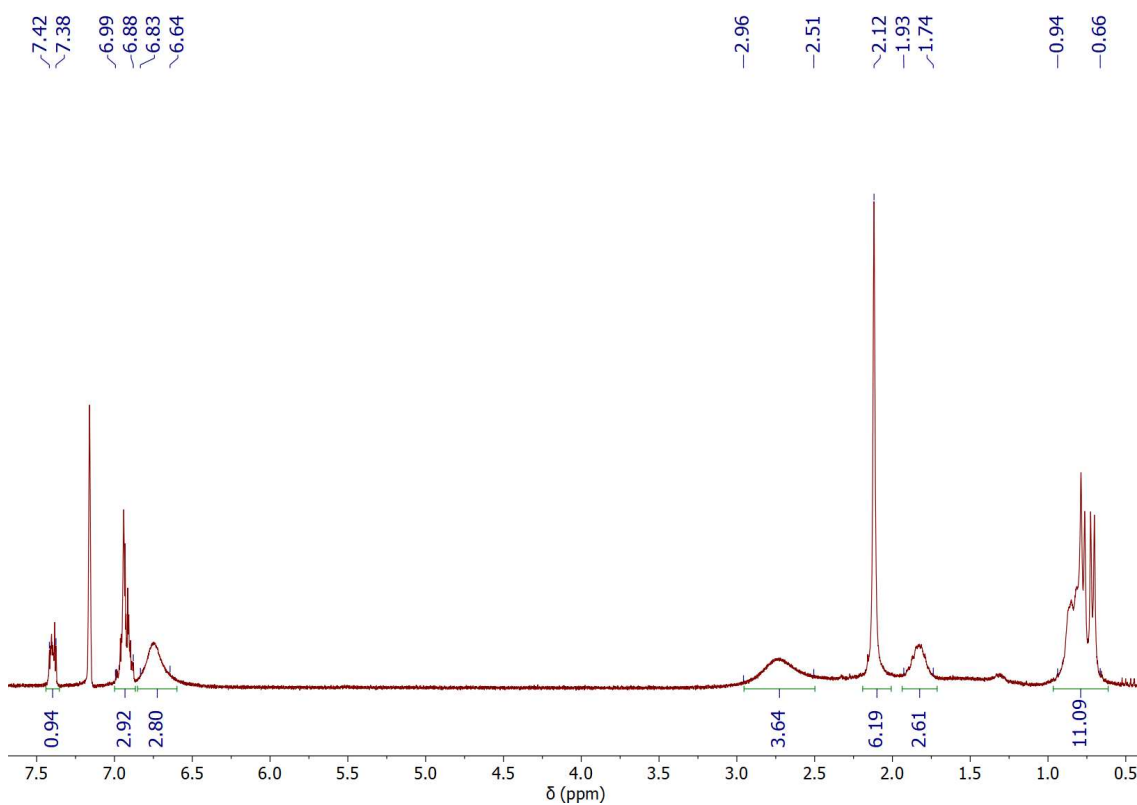

$^{13}\text{C}\{^1\text{H}\}$  NMR spectrum (150 MHz, 298 K) in  $\text{C}_6\text{D}_6$

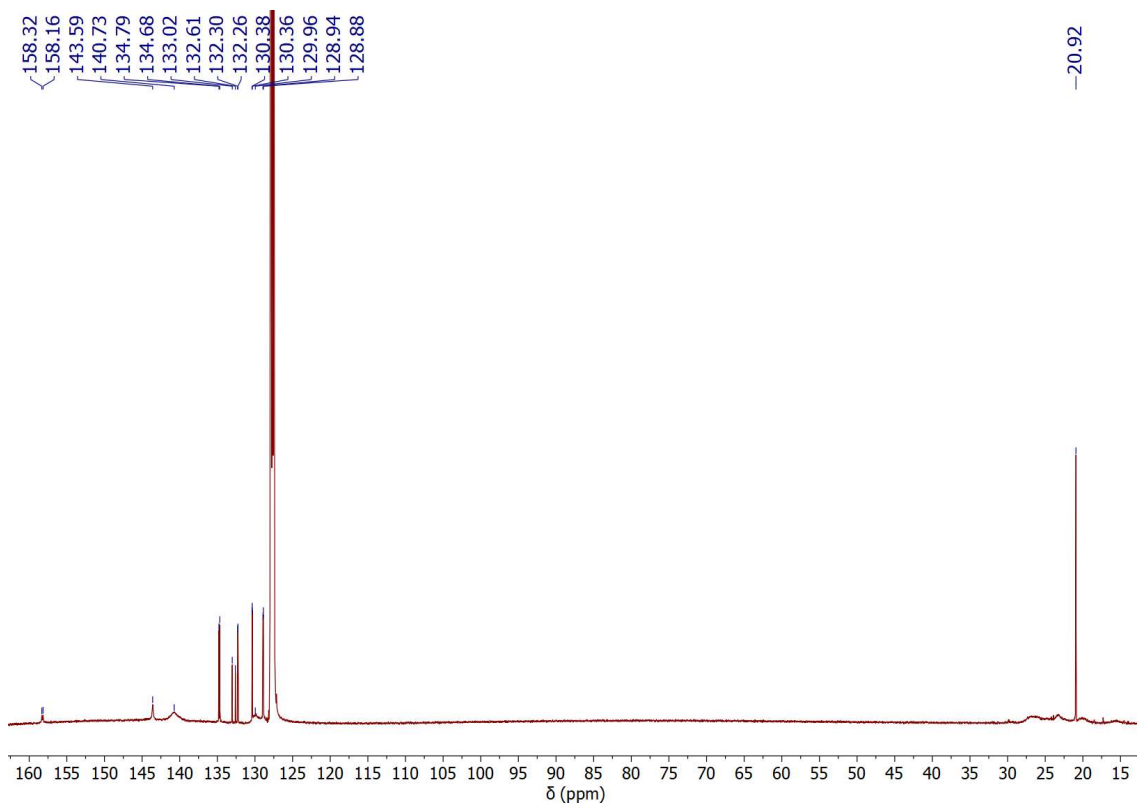

$^{13}\text{C}\{^1\text{H}\}$  NMR spectrum (150 MHz, 298 K) in  $\text{C}_6\text{D}_6$ ; aromatic region

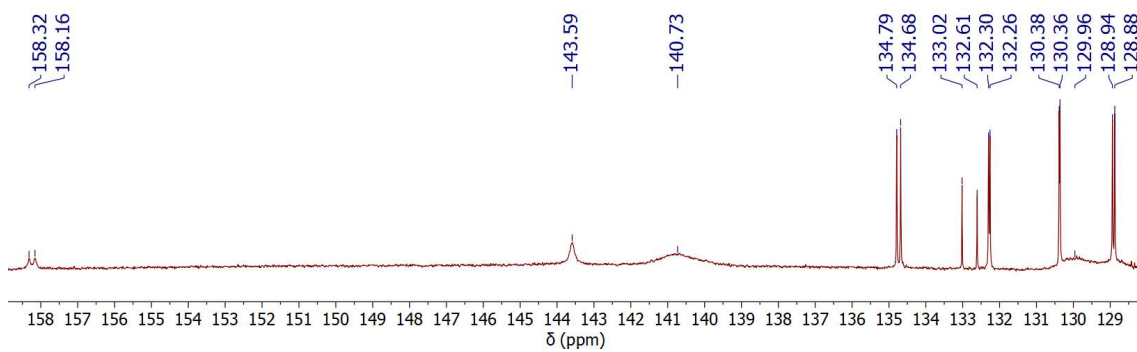

$^{13}\text{C}\{^1\text{H}\}$  NMR spectrum (150 MHz, 298 K) in  $\text{C}_6\text{D}_6$ ; aliphatic region

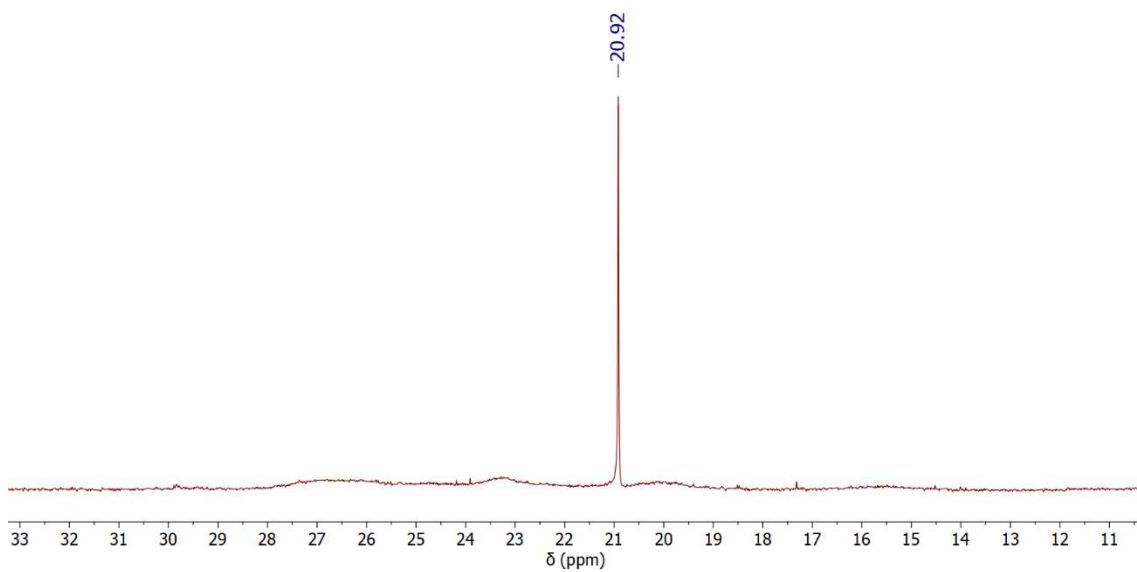

$^{31}\text{P}\{^1\text{H}\}$  NMR spectrum (121 MHz, 298 K) in  $\text{C}_6\text{D}_6$

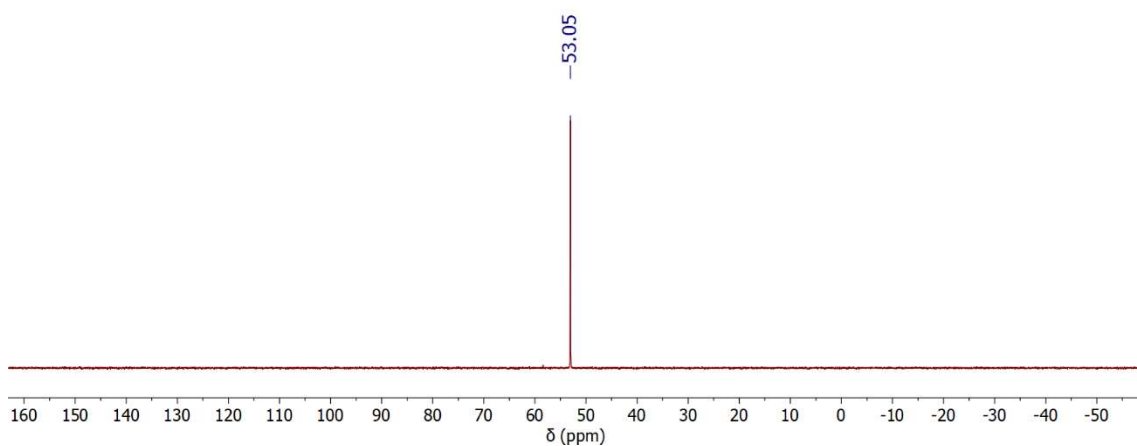



PBMes<sub>2</sub>AuNTf<sub>2</sub>

<sup>1</sup>H NMR (300 MHz, 298 K, C<sub>6</sub>D<sub>6</sub>) δ 7.37 – 7.33 (m, 1H, CH<sub>Ar</sub>), 7.02 – 6.88 (m, 3H, CH<sub>Ar</sub>), 6.81 – 6.65 (brs, 2H, CH<sub>Mes</sub>), 2.29 – 1.09 (brs, 3H, CH<sub>3Mes</sub>), 2.09 (s, 6H, CH<sub>3Mes</sub>), 1.80 – 1.67 (brs, 2H, CH<sub>iPr</sub>), 0.8 – 0.69 (m, 12H, CH<sub>3iPr</sub>).

<sup>13</sup>C{<sup>1</sup>H} NMR (150 MHz, 298 K, C<sub>6</sub>D<sub>6</sub>) δ 157.7 (d, <sup>1</sup>J<sub>C-P</sub> = 18 Hz, C<sub>ipso-P</sub>), 142.7 (br, C<sub>ipso-B</sub>), 141.0 (br, C<sub>Mes</sub>), 135.1 (d, J<sub>C-P</sub> = 13 Hz, CH<sub>Ar</sub>), 133.0 (d, J<sub>C-P</sub> = 8 Hz, CH<sub>Ar</sub>), 130.9 (d, J<sub>C-P</sub> = 3 Hz, CH<sub>Ar</sub>), 130.4 (C<sub>Mes</sub>), 130.1 (C<sub>Mes</sub>), 129.5 (br, C<sub>Mes</sub>), 129.1 (d, J<sub>C-P</sub> = 9 Hz, CH<sub>Ar</sub>), 120.1 (q, J<sub>C-F</sub> = 323 Hz, CF<sub>3</sub>), 20.8 (CH<sub>3Mes</sub>). CH<sub>3Mes</sub>, CH<sub>3iPr</sub> and CH<sub>iPr</sub> are not visible. HSQC spectrum indicated coupling with the corresponding signals of <sup>1</sup>H NMR

<sup>31</sup>P{<sup>1</sup>H} NMR (203 MHz, 298 K, C<sub>6</sub>D<sub>6</sub>) δ 54.2.

<sup>19</sup>F{<sup>1</sup>H} NMR (282 MHz, 298 K, C<sub>6</sub>D<sub>6</sub>) δ -74.3.

<sup>11</sup>B{<sup>1</sup>H} NMR (160 MHz, 298 K, C<sub>6</sub>D<sub>6</sub>) δ Not detected.

HRMS-DCI(CH<sub>4</sub>) (*m/z*): found [M]<sup>+</sup> 800.1014, calcd. C<sub>23</sub>H<sub>29</sub>Au<sup>11</sup>BF<sub>6</sub>NO<sub>4</sub>PS<sub>2</sub> requires 800.0939.

<sup>1</sup>H NMR spectrum (300 MHz, 298 K) in C<sub>6</sub>D<sub>6</sub>

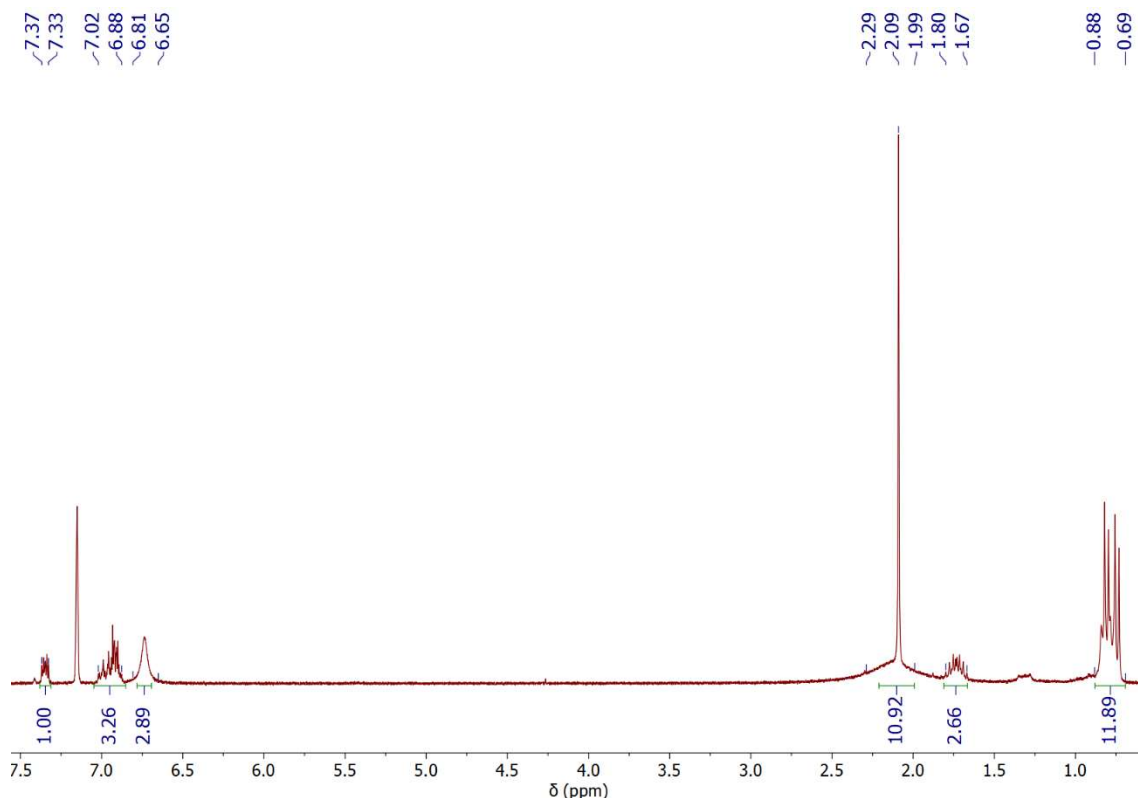

$^1\text{H}$  NMR spectrum (300 MHz, 298 K) in  $\text{C}_6\text{D}_6$ ; aromatic region

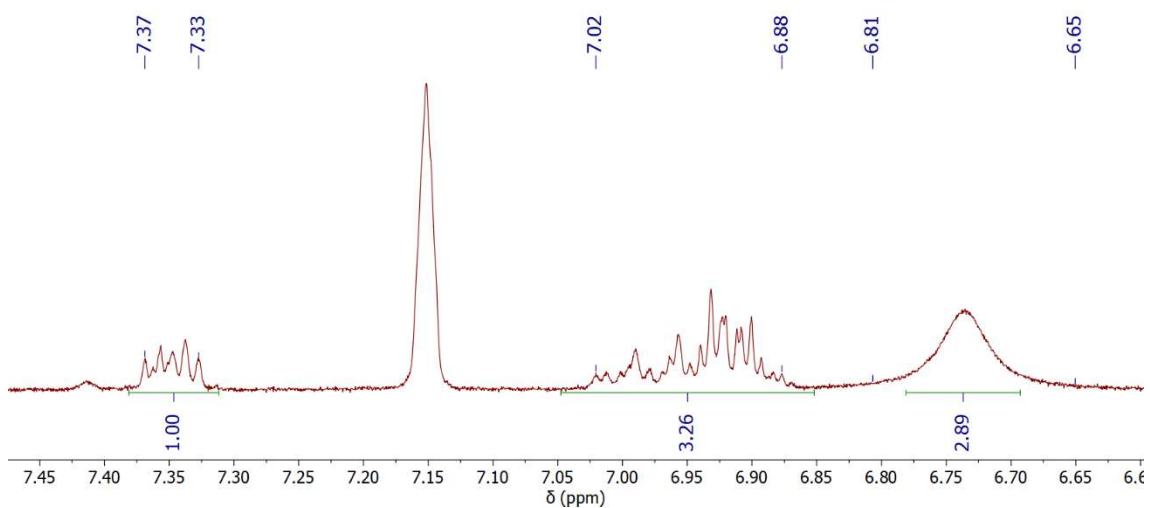

$^1\text{H}$  NMR spectrum (300 MHz, 298 K) in  $\text{C}_6\text{D}_6$ ; aliphatic region

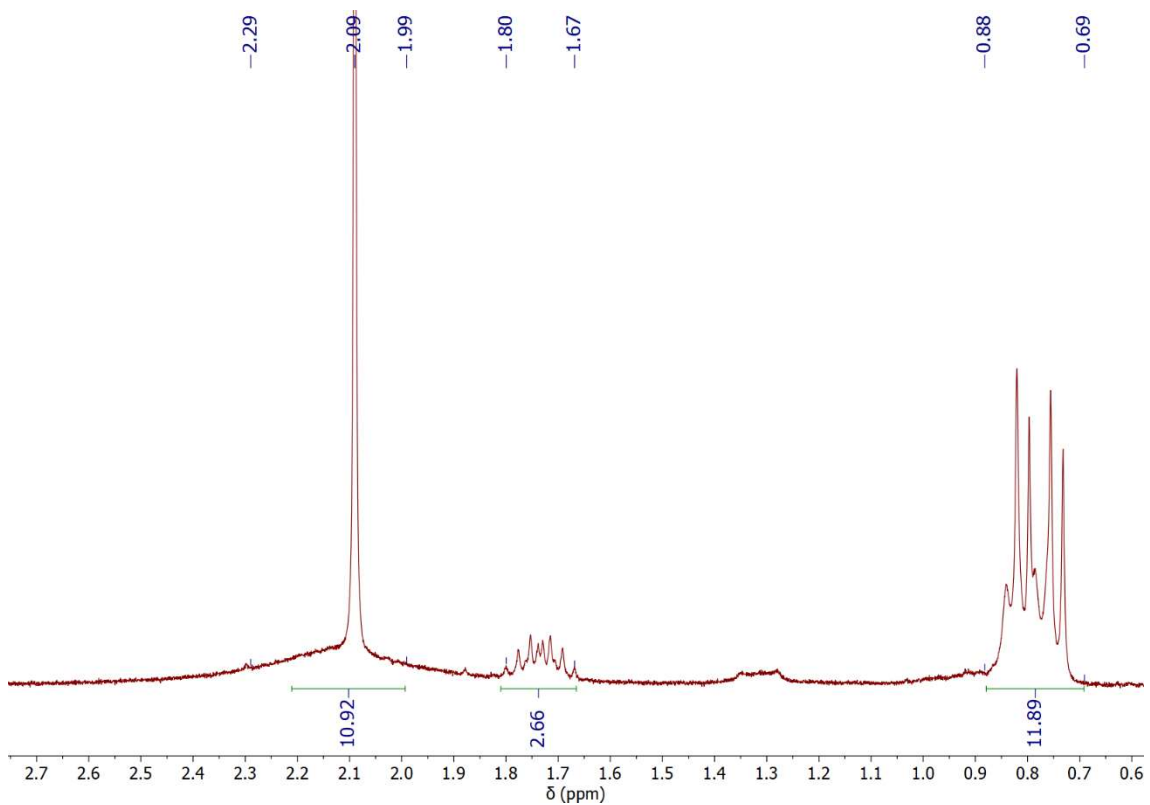

$^{13}\text{C}\{^1\text{H}\}$  NMR spectrum (150 MHz, 298 K) in  $\text{C}_6\text{D}_6$

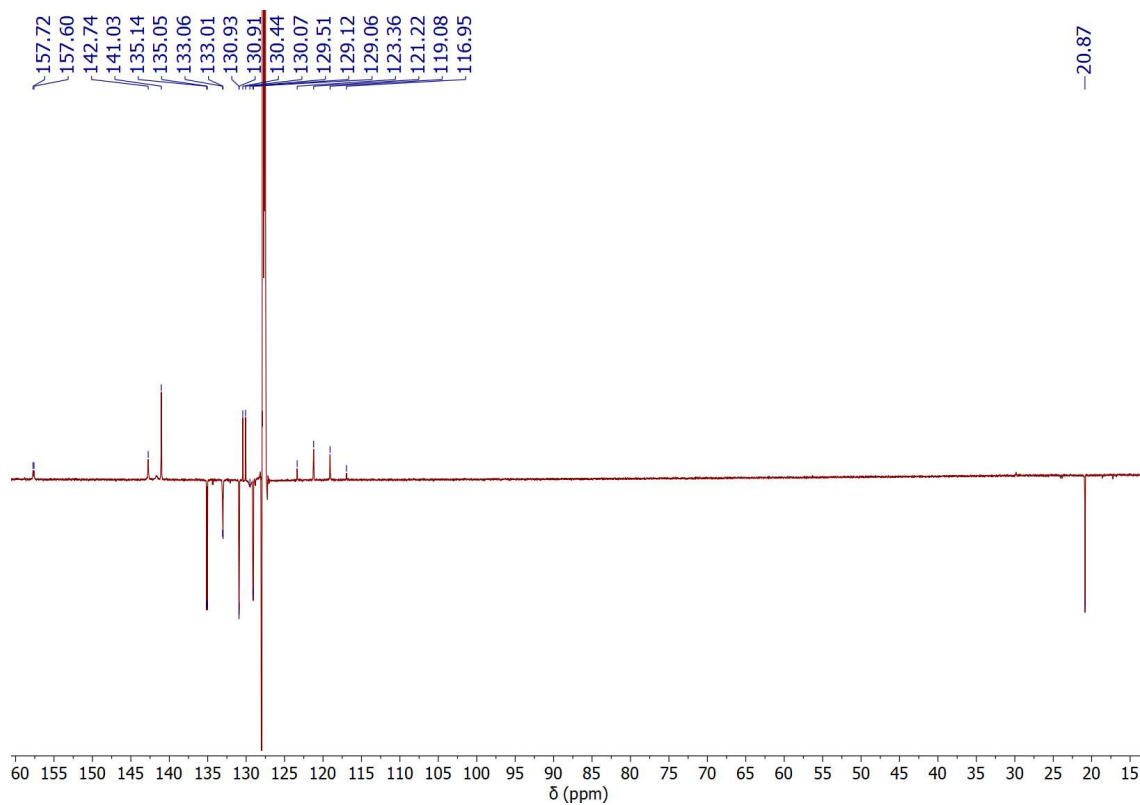

$^{13}\text{C}\{^1\text{H}\}$  NMR spectrum (150 MHz, 298 K) in  $\text{C}_6\text{D}_6$ ; aromatic region

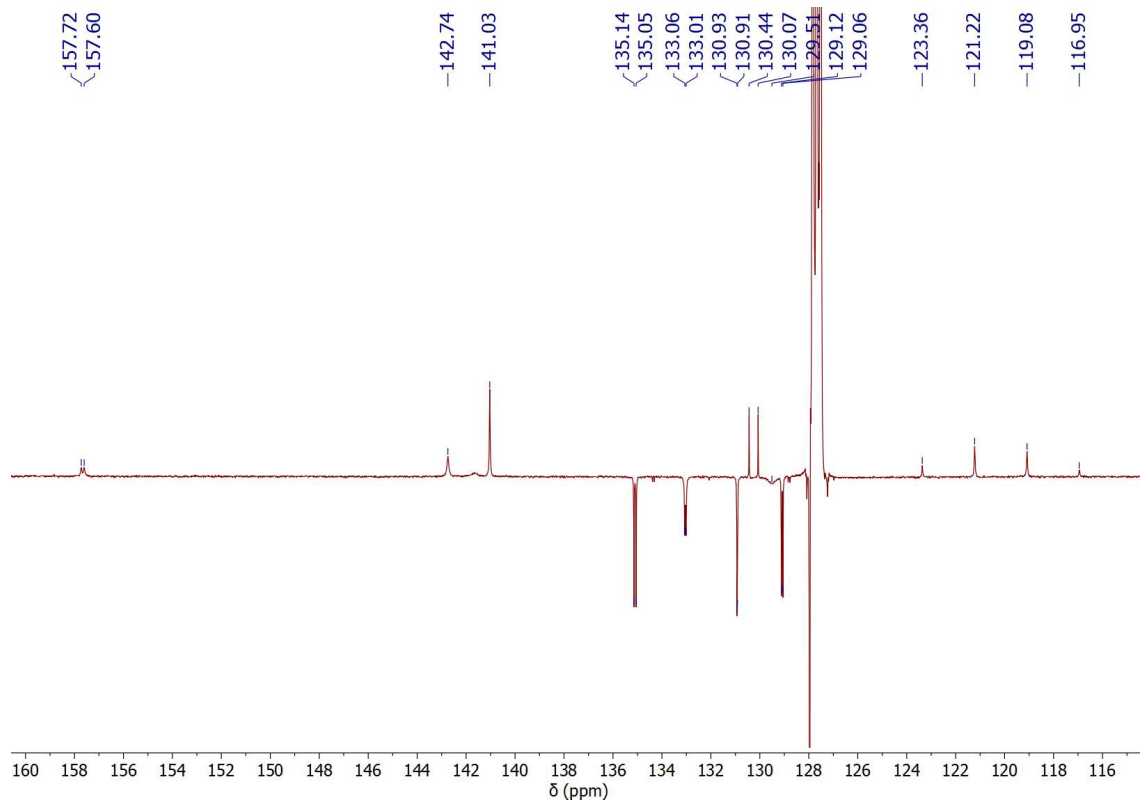

$^{31}\text{P}\{^1\text{H}\}$  NMR spectrum (203 MHz, 298 K) in  $\text{C}_6\text{D}_6$

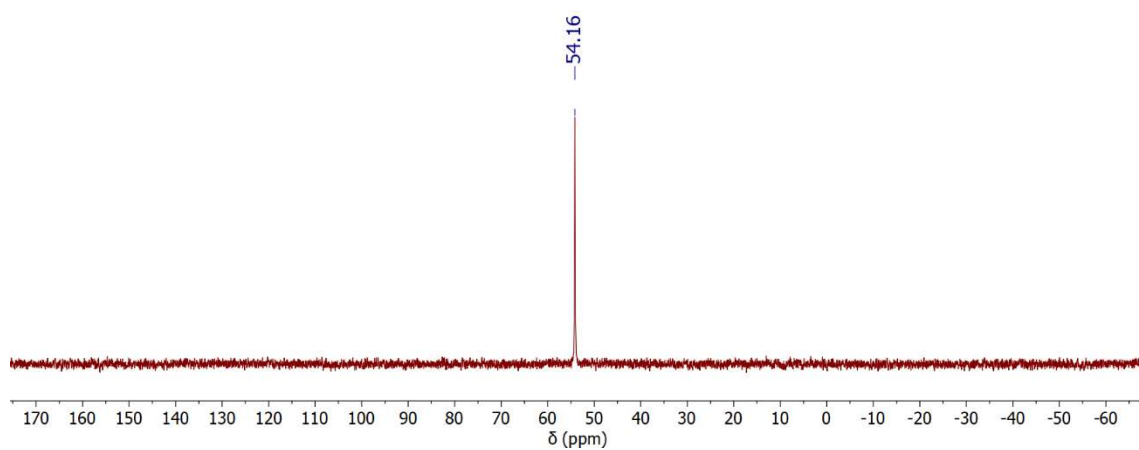

$^{19}\text{F}\{^1\text{H}\}$  NMR spectrum (282 MHz, 298 K) in  $\text{C}_6\text{D}_6$

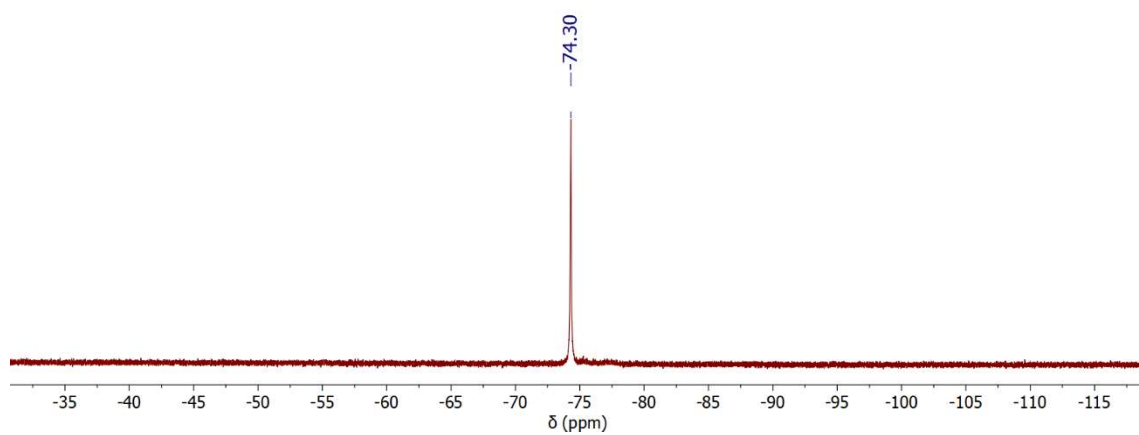

## PBpinAuCl

$^1\text{H}$  NMR (600 MHz, 298 K,  $\text{C}_6\text{D}_6$ )  $\delta$  7.93 (pseudo-ddd,  $^3J_{\text{H-H}} = 7.6$ ,  $^4J_{\text{H-H}} = 1.5$ ,  $^3J_{\text{H-P}} = 2.9$  Hz, 1H, H<sub>3</sub>), 7.39 (brs, 1H, H<sub>6</sub>), 7.05 (pseudo-tdd,  $^3J_{\text{H-H}} = 7.6$ ,  $^4J_{\text{H-H}} = 1.5$ ,  $^4J_{\text{H-P}} = 2.3$  Hz, 1H, H<sub>4</sub>), 6.98 (pseudo-ttt,  $^3J_{\text{H-H}} = 7.6$ ,  $^4J_{\text{H-H}} = 1.5$ ,  $^5J_{\text{H-P}} = 2.4$  Hz, 1H, H<sub>5</sub>), 2.34 (brs, 2H,  $\text{CH}_{i\text{Pr}}$ ), 1.25 (s, 12H,  $\text{CH}_{3\text{pin}}$ ), 0.93 (dd,  $^3J_{\text{H-H}} = 7.0$ ,  $^3J_{\text{H-P}} = 17.1$  Hz, 6H,  $\text{CH}_{3\text{Pr}}$ ), 0.77 (dd,  $^3J_{\text{H-H}} = 7.0$ ,  $^3J_{\text{H-P}} = 17.1$  Hz, 6H,  $\text{CH}_{3\text{Pr}}$ ).

$^{13}\text{C}\{^{31}\text{P}\}\{^1\text{H}\}$  NMR (150 MHz, 298 K,  $\text{C}_6\text{D}_6$ )  $\delta$  136.9 (C<sub>3</sub>), 133.4 (C<sub>1</sub>), 129.9 (C<sub>4</sub>), 129.7 (C<sub>5</sub>), 84.8 (C<sub>pin</sub>), 25.8 ( $\text{CH}_{i\text{Pr}}$ ), 25.0 ( $\text{CH}_{3\text{pin}}$ ), 24.3 ( $\text{CH}_{3\text{pin}}$ ), 19.9 ( $\text{CH}_{3\text{Pr}}$ ), 19.1 ( $\text{CH}_{3\text{Pr}}$ ). \*The quaternary carbon C<sub>2</sub> is not visible in 1D or 2D experiments.

$^{31}\text{P}\{^1\text{H}\}$  NMR (203 MHz, 298 K,  $\text{C}_6\text{D}_6$ )  $\delta$  61.4.

$^{11}\text{B}\{^1\text{H}\}$  NMR (160 MHz, 298 K,  $\text{C}_6\text{D}_6$ )  $\delta$  Not detected.

HRMS-DCI( $\text{CH}_4$ ) ( $m/z$ ): found  $[\text{M}]^+$  552.1431, calcd.  $\text{C}_{18}\text{H}_{30}\text{Au}^{11}\text{BClO}_2\text{P}$  requires 552.1431.

$^{31}\text{P}\{^1\text{H}\}$  NMR spectrum (203 MHz, 298 K) in  $\text{C}_6\text{D}_6$

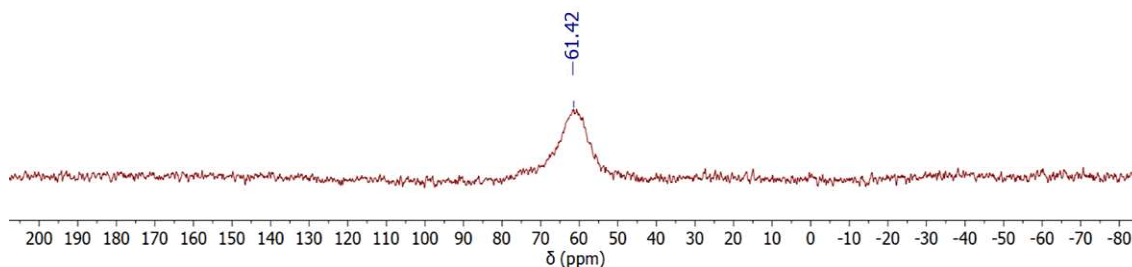

$^1\text{H}$  NMR spectrum (600 MHz, 298 K) in  $\text{C}_6\text{D}_6$

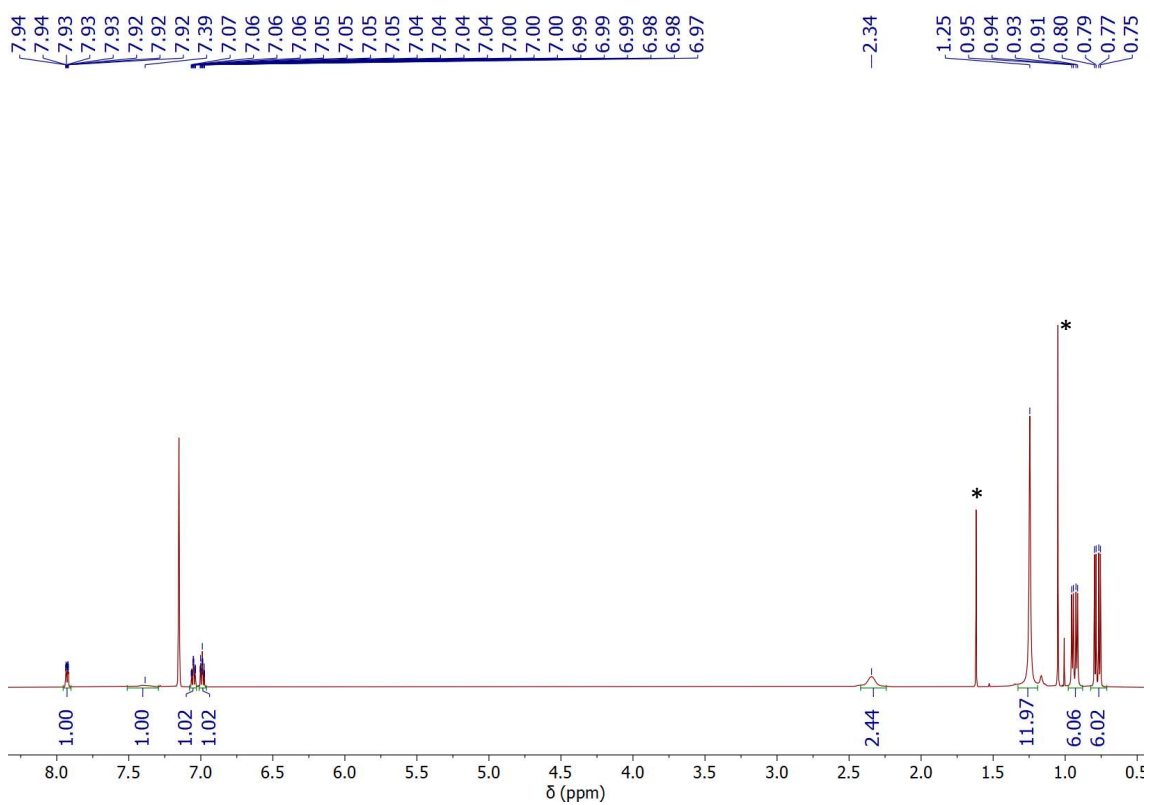

\*Acetone and pinacol

$^1\text{H}\{^{31}\text{P}\}$  NMR spectrum (600 MHz, 298 K) in  $\text{C}_6\text{D}_6$

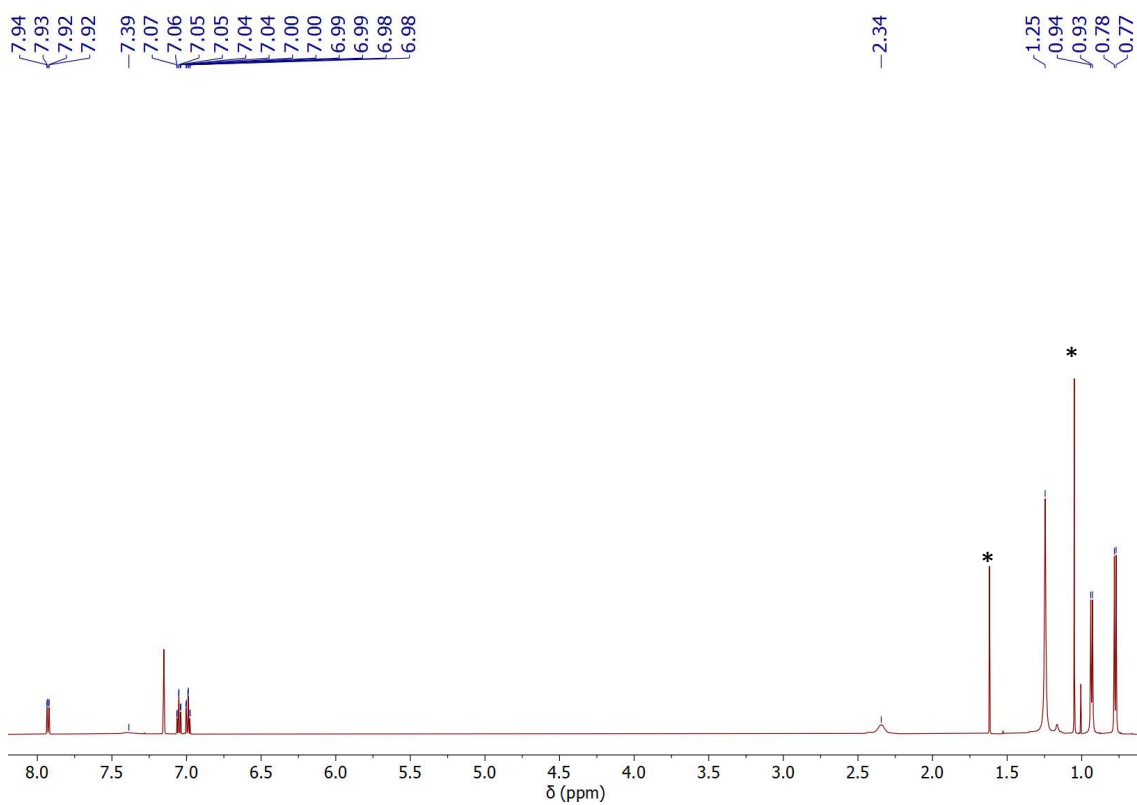

\*Acetone and pinacol

$^1\text{H}$  NMR spectrum (600 MHz, 298 K) in  $\text{C}_6\text{D}_6$ ; aromatic region

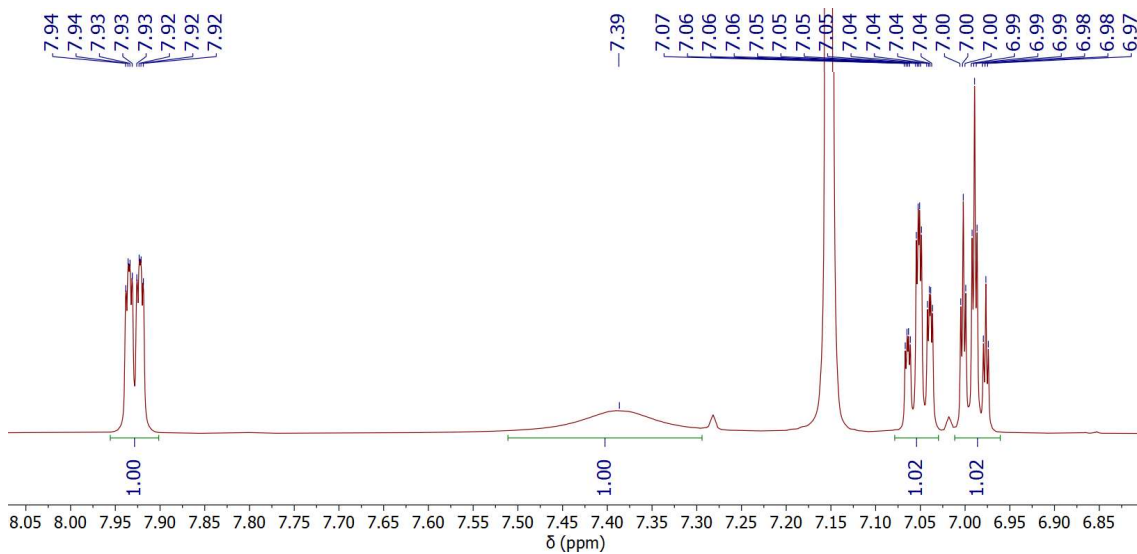

$^1\text{H}\{^{31}\text{P}\}$  NMR spectrum (600 MHz, 298 K) in  $\text{C}_6\text{D}_6$ ; aromatic region

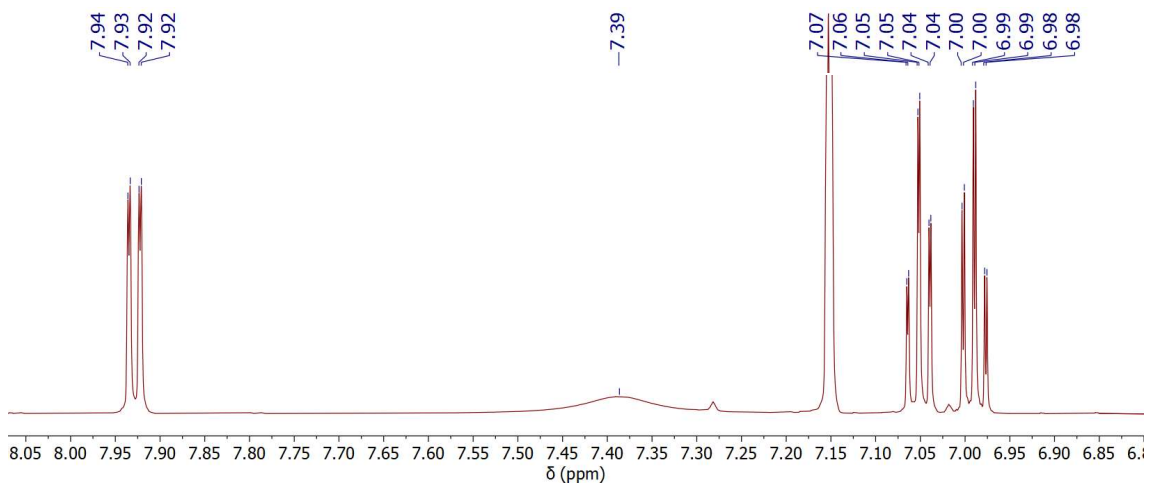

$^1\text{H}$  NMR spectrum (600 MHz, 298 K) in  $\text{C}_6\text{D}_6$ ; aliphatic region

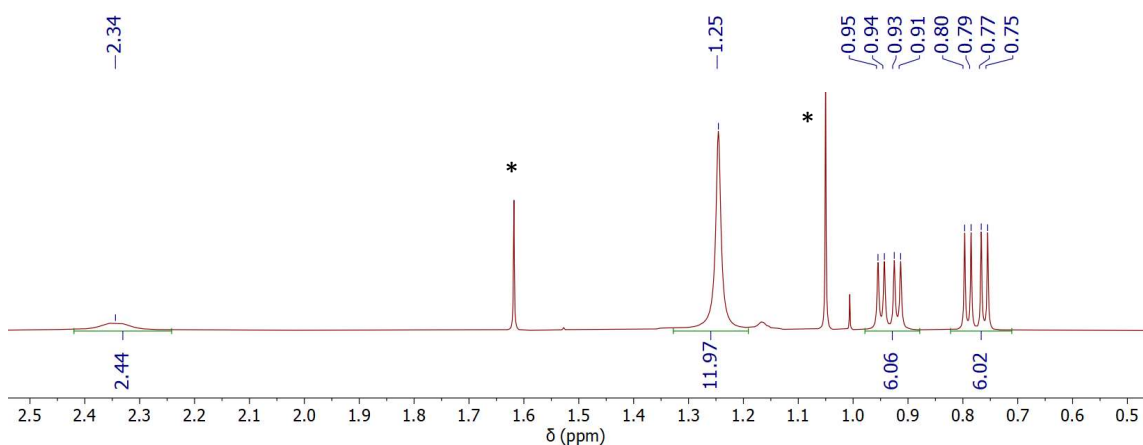

\*Acetone and pinacol

$^1\text{H}\{^{31}\text{P}\}$  NMR spectrum (600 MHz, 298 K) in  $\text{C}_6\text{D}_6$ ; aliphatic region

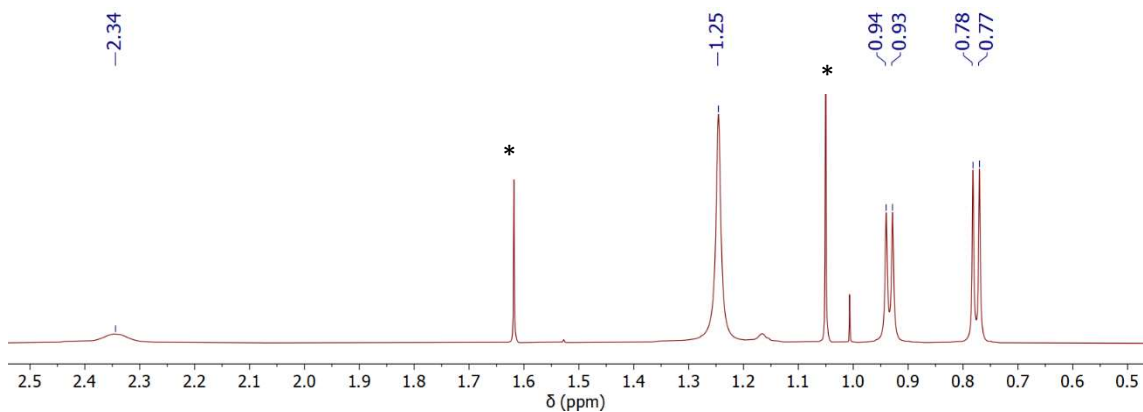

\*Acetone and pinacol



$^{13}\text{C}\{^{31}\text{P}\}\{^1\text{H}\}$  NMR spectrum (150 MHz, 298 K) in  $\text{C}_6\text{D}_6$

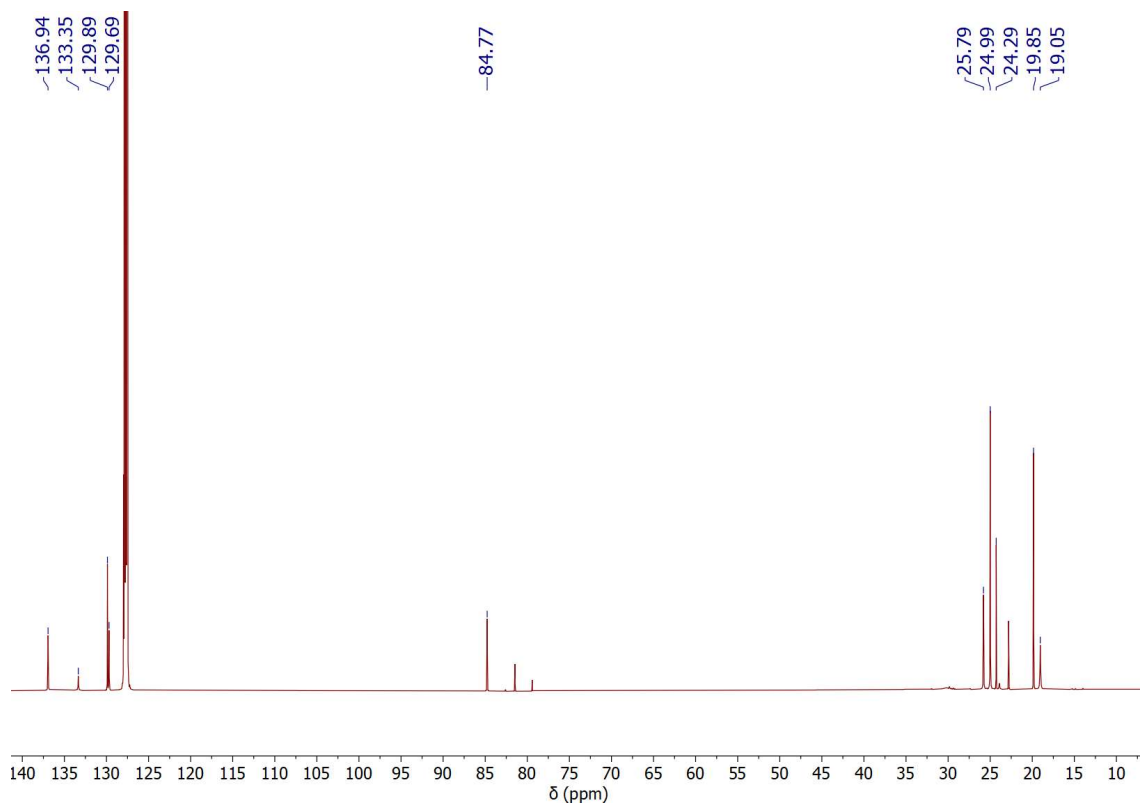

$^{13}\text{C}\{^{31}\text{P}\}\{^1\text{H}\}$  NMR spectrum (150 MHz, 298 K) in  $\text{C}_6\text{D}_6$ ; aromatic region

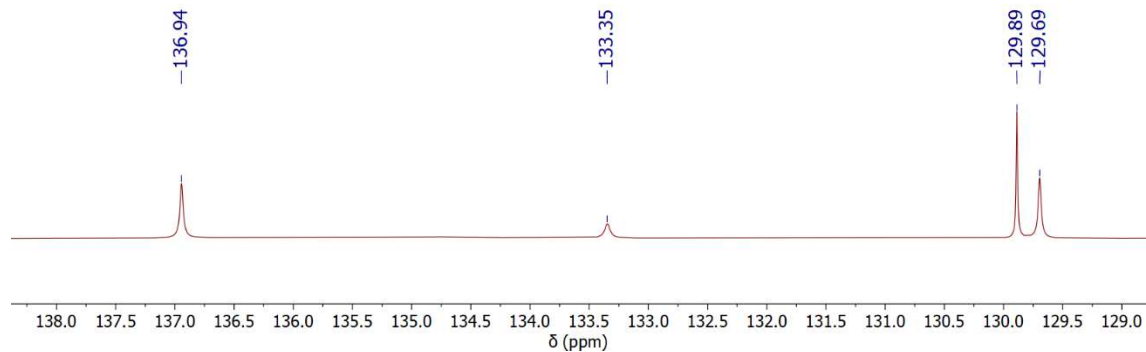

$^{13}\text{C}\{^{31}\text{P}\}\{^1\text{H}\}$  NMR spectrum (150 MHz, 298 K) in  $\text{C}_6\text{D}_6$ ; aliphatic region

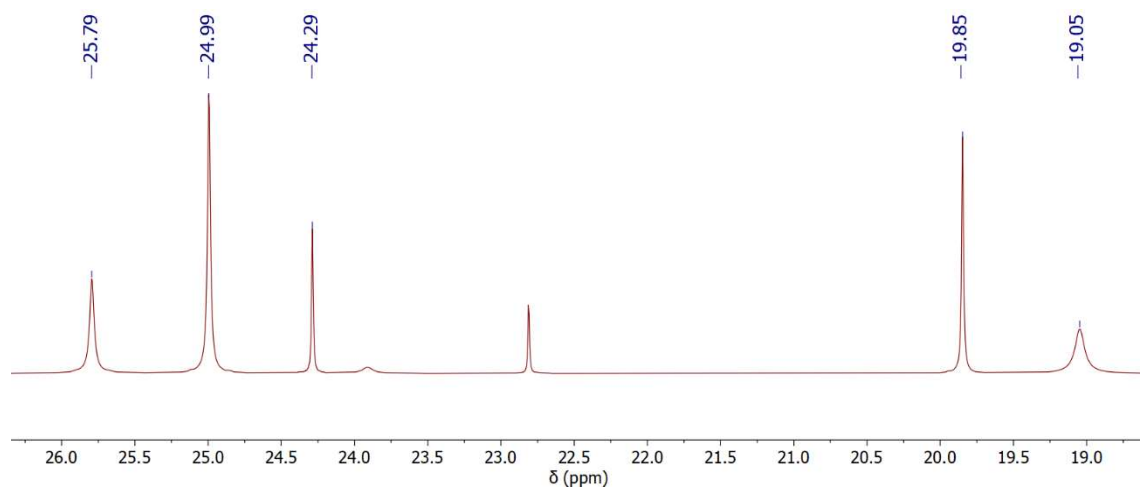

PBpinAuNTf<sub>2</sub>

<sup>1</sup>H NMR (600 MHz, 298 K, C<sub>6</sub>D<sub>6</sub>) δ 8.21 (brs, 1H, H<sub>6</sub>), 8.12 – 8.09 (m, 1H, H<sub>3</sub>), 7.17 – 7.07 (m, 2H, H<sub>4</sub>, H<sub>5</sub>), 2.91 – 2.82 (m, 2H, CH<sub>*i*</sub>Pr), 1.20 (dd, <sup>3</sup>J<sub>H-H</sub> = 7.0, <sup>3</sup>J<sub>H-P</sub> = 18 Hz, 6H, CH<sub>3</sub>Pr), 1.11 (s, 12H, CH<sub>3</sub>pin), 0.88 (dd, <sup>3</sup>J<sub>H-H</sub> = 7.0, <sup>3</sup>J<sub>H-P</sub> = 18 Hz, 6H, CH<sub>3</sub>Pr).

<sup>13</sup>C{<sup>1</sup>H} NMR (150 MHz, 298 K, C<sub>6</sub>D<sub>6</sub>) δ 138.6 (d, <sup>2</sup>J<sub>C-P</sub> = 10 Hz, C<sub>3</sub>), 132.3 (d, <sup>1</sup>J<sub>C-P</sub> = 55 Hz, C<sub>2</sub>), 131.2 (d, <sup>3</sup>J<sub>C-P</sub> = 14 Hz, C<sub>4</sub>), 130.9 (d, <sup>4</sup>J<sub>C-P</sub> = 3 Hz, C<sub>5</sub>), 120.2 (q, <sup>1</sup>J<sub>C-F</sub> = 323 Hz, CF<sub>3</sub>), 84.5 (C<sub>pin</sub>), 26.6 (d, <sup>1</sup>J<sub>C-P</sub> = 33 Hz, CH<sub>*i*</sub>Pr), 24.4 (CH<sub>3</sub>pin), 20.5 (d, <sup>2</sup>J<sub>H-P</sub> = 3 Hz, CH<sub>3</sub>Pr). C<sub>1</sub> is not observed. One C<sub>Ar</sub> is under the signal of C<sub>6</sub>D<sub>6</sub>.

<sup>31</sup>P{<sup>1</sup>H} NMR (203 MHz, 298 K, C<sub>6</sub>D<sub>6</sub>) δ 76.4.

<sup>19</sup>F{<sup>1</sup>H} NMR (282 MHz, 298 K, C<sub>6</sub>D<sub>6</sub>) δ -75.9.

<sup>11</sup>B{<sup>1</sup>H} NMR (160 MHz, 298 K, C<sub>6</sub>D<sub>6</sub>) δ Not detected.

HRMS-DCI(CH<sub>4</sub>) (*m/z*): found [M]<sup>+</sup> 797.0933, calcd. C<sub>20</sub>H<sub>30</sub>Au<sup>11</sup>BF<sub>6</sub>NO<sub>6</sub>PS<sub>2</sub> requires 797.0915.

<sup>19</sup>F{<sup>1</sup>H} NMR spectrum (282 MHz, 298 K) in C<sub>6</sub>D<sub>6</sub>

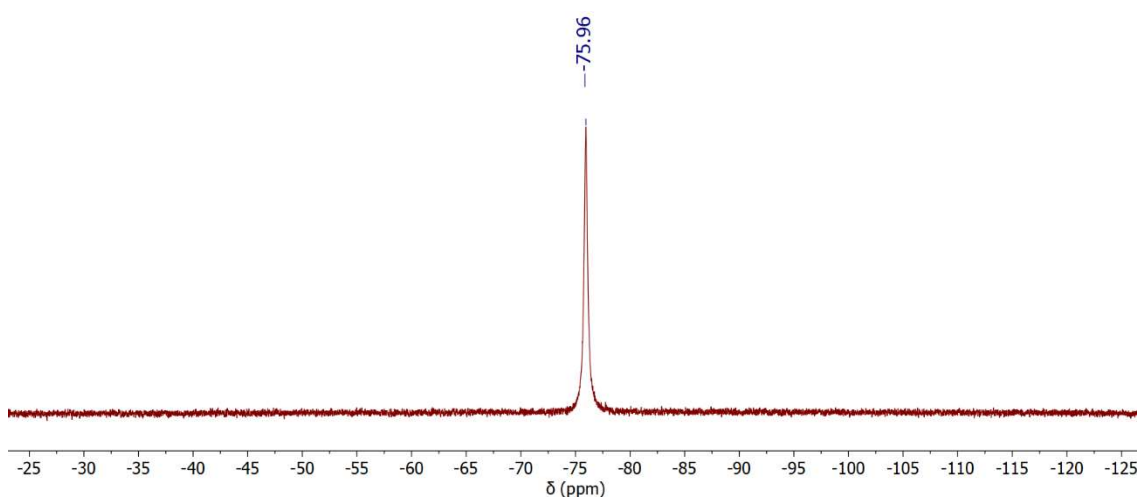

$^1\text{H}$  NMR spectrum (600 MHz, 298 K) in  $\text{C}_6\text{D}_6$

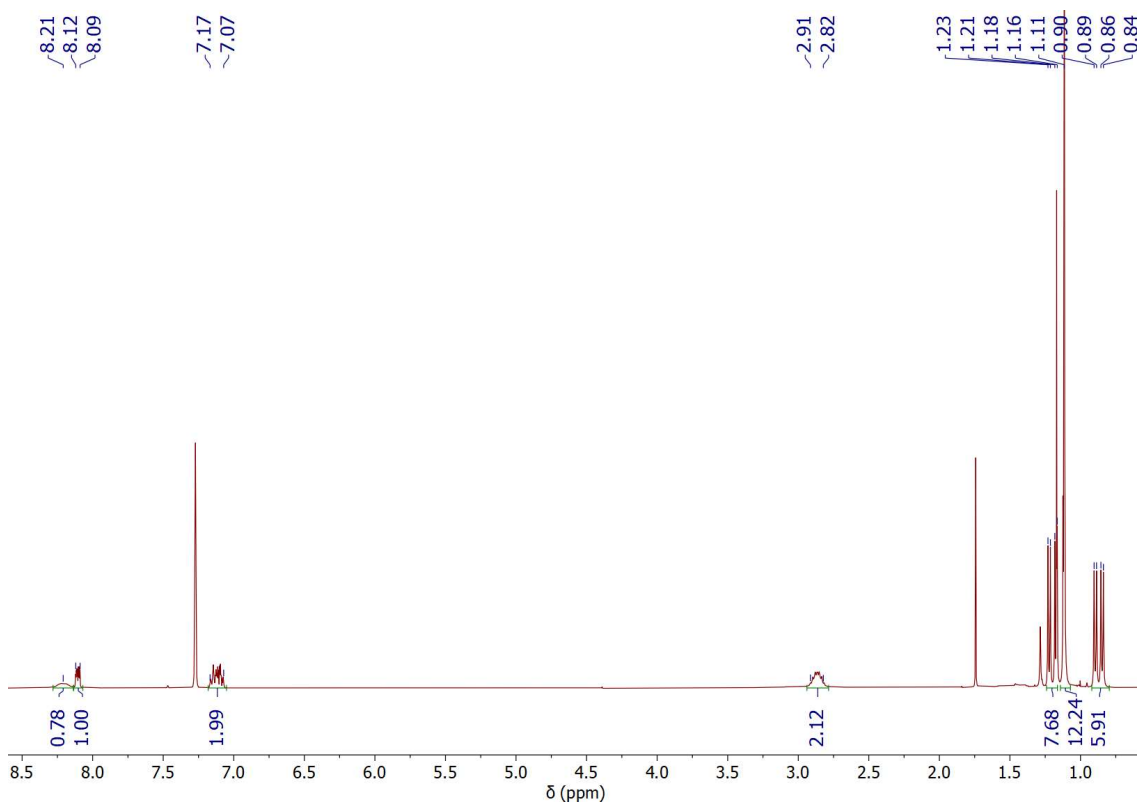

$^1\text{H}\{^{31}\text{P}\}$  NMR spectrum (600 MHz, 298 K) in  $\text{C}_6\text{D}_6$

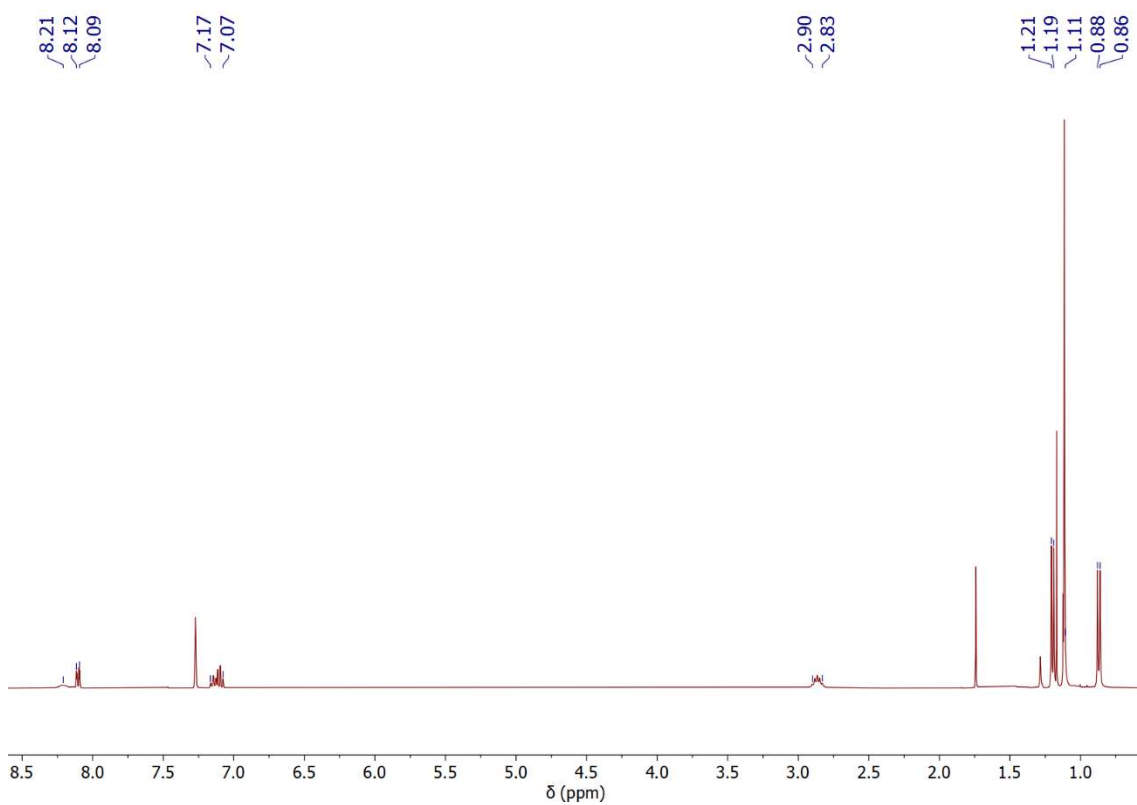

$^1\text{H}$  NMR spectrum (600 MHz, 298 K) in  $\text{C}_6\text{D}_6$ ; aromatic region

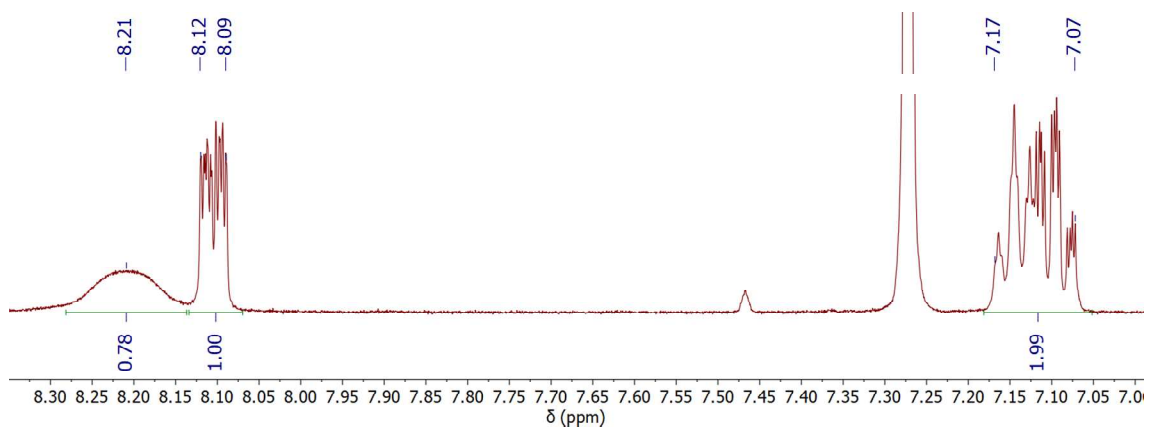

$^1\text{H}\{^{31}\text{P}\}$  NMR spectrum (600 MHz, 298 K) in  $\text{C}_6\text{D}_6$ ; aromatic region

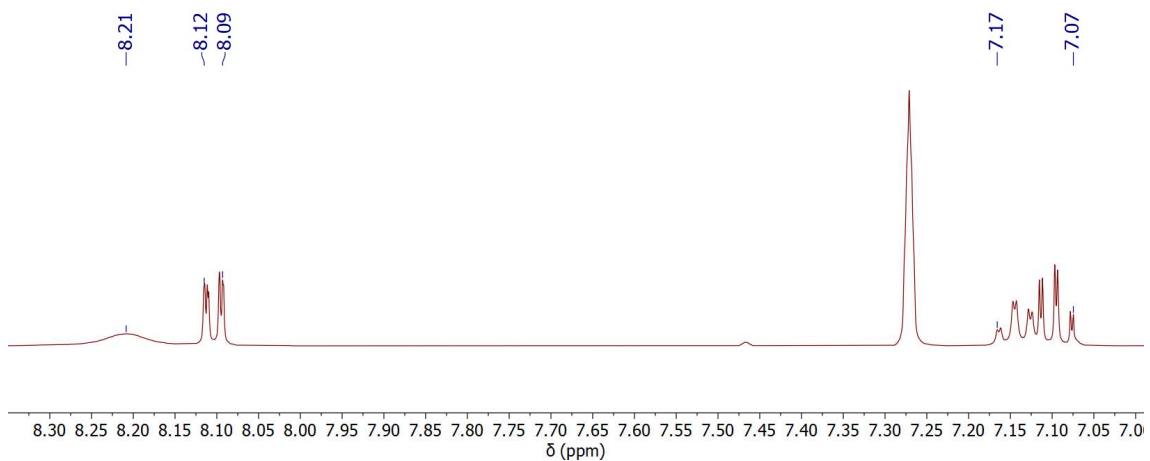

$^1\text{H}$  NMR spectrum (600 MHz, 298 K) in  $\text{C}_6\text{D}_6$ ; aliphatic region

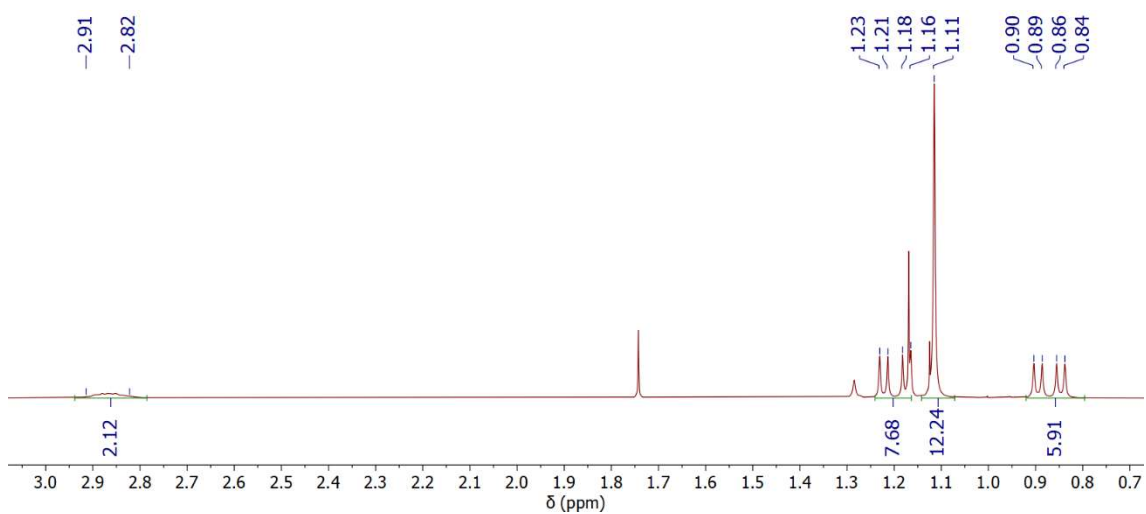

$^1\text{H}\{^3\text{P}\}$  NMR spectrum (600 MHz, 298 K) in  $\text{C}_6\text{D}_6$ ; aliphatic region

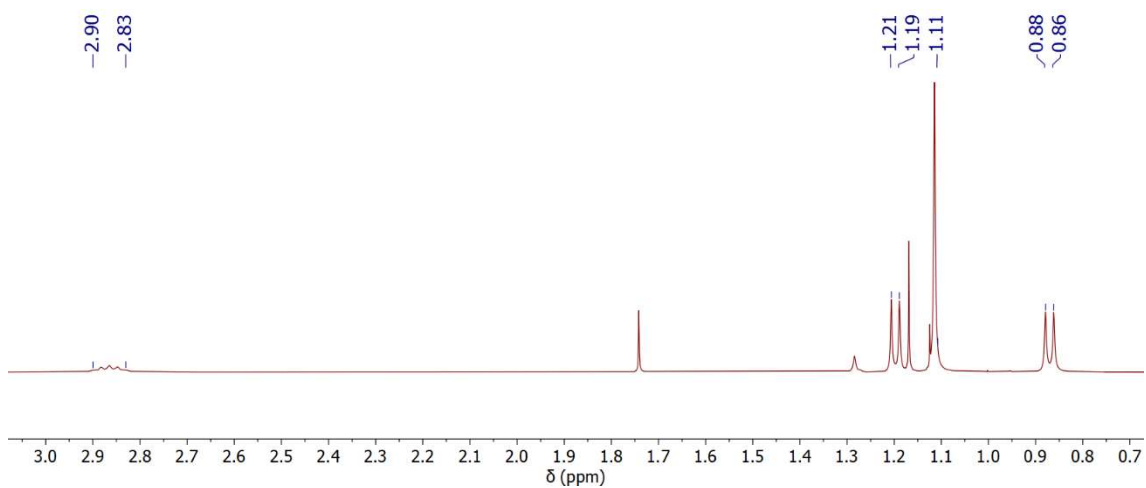

$^{13}\text{C}\{^1\text{H}\}$  NMR spectrum (150 MHz, 298 K) in  $\text{C}_6\text{D}_6$

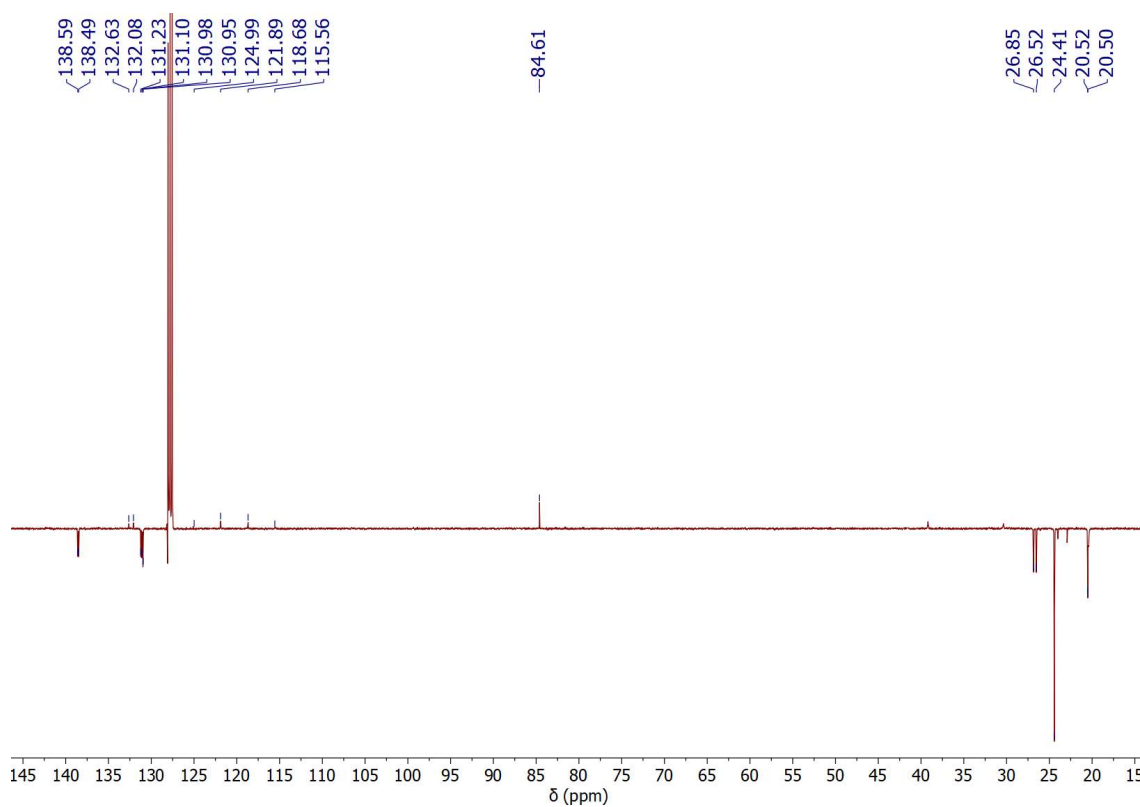

$^{13}\text{C}\{^1\text{H}\}$  NMR spectrum (150 MHz, 298 K) in  $\text{C}_6\text{D}_6$ ; aromatic region

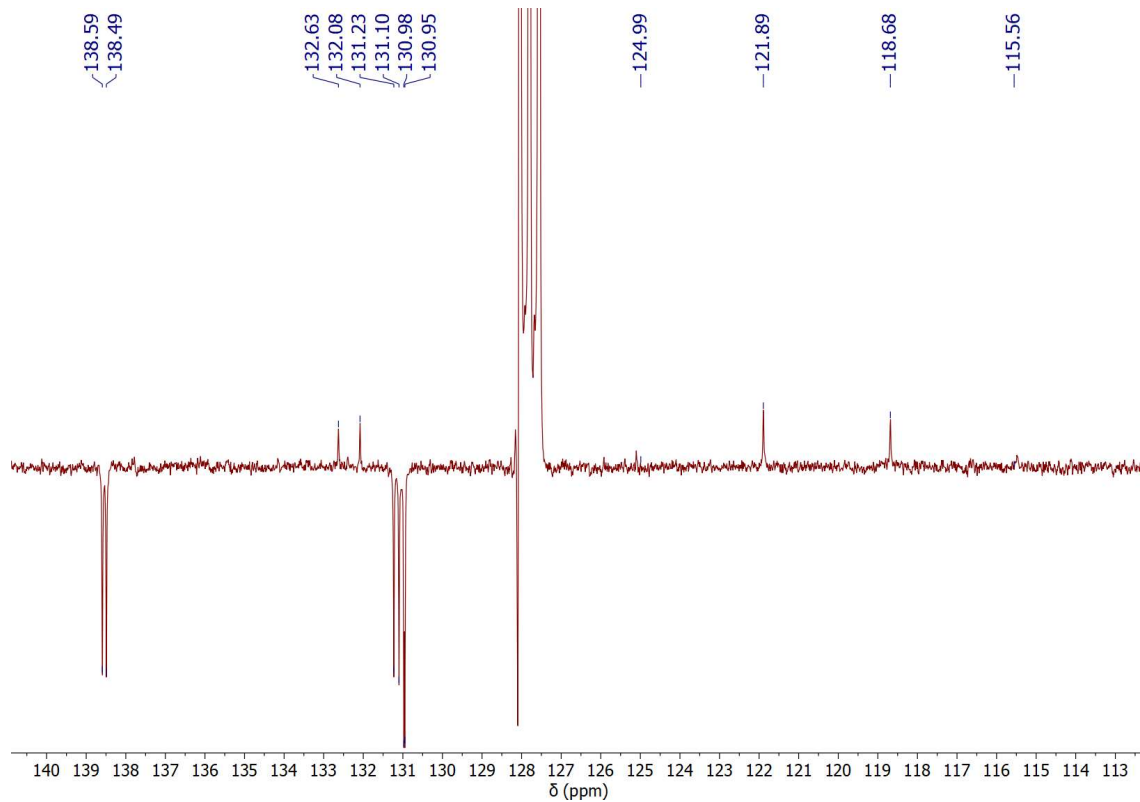

$^{13}\text{C}\{^{31}\text{P}\}\{^1\text{H}\}$  NMR spectrum (150 MHz, 298 K) in  $\text{C}_6\text{D}_6$ ; aromatic region

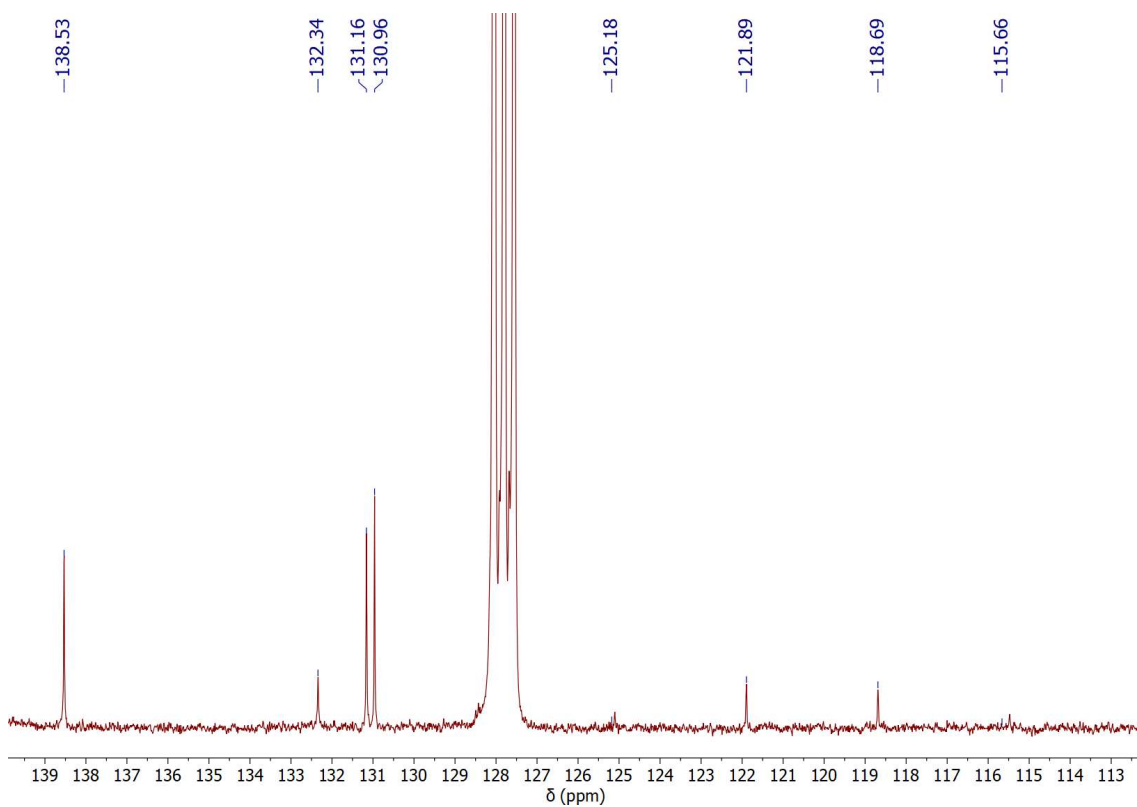

$^{13}\text{C}\{^1\text{H}\}$  NMR spectrum (150 MHz, 298 K) in  $\text{C}_6\text{D}_6$ ; aliphatic region

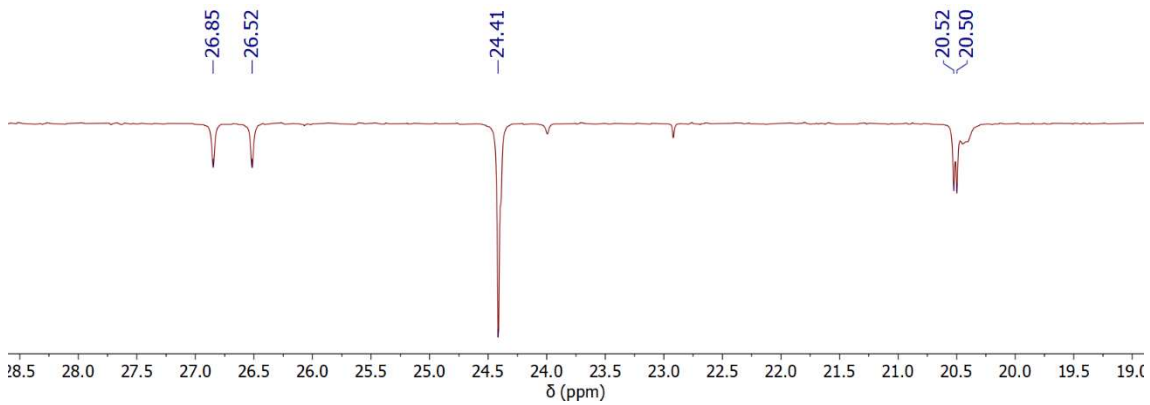

$^{31}\text{P}\{^1\text{H}\}$  NMR spectrum (203 MHz, 298 K) in  $\text{C}_6\text{D}_6$

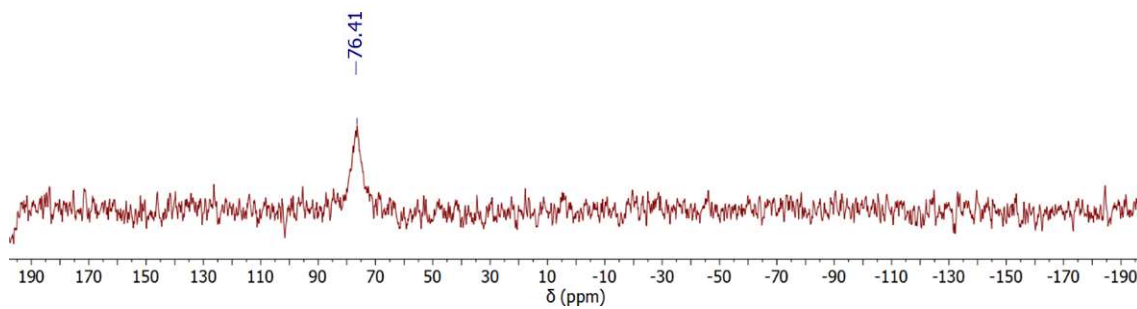

$^{19}\text{F}\{^1\text{H}\}$  NMR spectrum (282 MHz, 298 K) in  $\text{C}_6\text{D}_6$

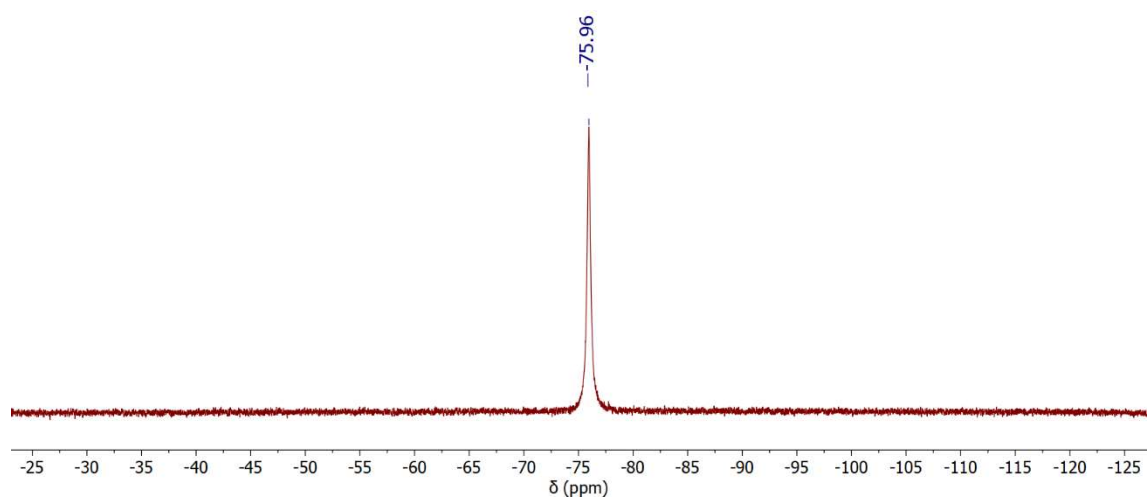



### 3. General procedure for control experiments

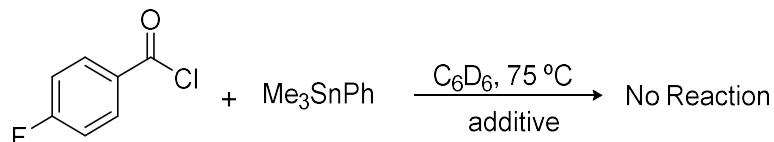

A mixture of acyl chloride (0.33 mmol, 1 Equiv.) and trimethyl(phenyl)tin (60  $\mu$ L, 0.33 mmol, 1 Equiv.) was dissolved in 0.6 ml C<sub>6</sub>D<sub>6</sub>. The solution was added to NMR tube containing C<sub>6</sub>F<sub>6</sub> (0.017 mmol) or/and 1,2-dichloroethane (0.025 mmol) as internal standard. The reaction was heated at 75 °C and monitored by <sup>1</sup>H and <sup>19</sup>F NMR spectroscopy and GC-MS. After 48 hours at 75 °C, no sign of conversion was detected. In the same conditions, no reaction was observed in the presence of additive: 5 mol% of BPh<sub>3</sub>, 5 mol% of BMe<sub>3</sub> or 5 mol % of ligand PBCy<sub>2</sub>.

### 4. General procedure for Stille coupling with (PBCy<sub>2</sub>)AuNTf<sub>2</sub> complex II as catalyst and associated competitive experiments

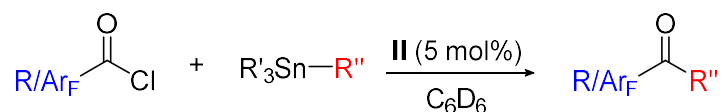

A mixture of acyl chloride (0.33 mmol) and tin compound (0.33 mmol) was dissolved in 0.6 mL of C<sub>6</sub>D<sub>6</sub>. The solution was added to NMR tube containing catalyst II (14 mg, 0.017 mmol, 5 mol%), Hg drops and C<sub>6</sub>F<sub>6</sub> (0.017 mmol) or/and 1,2-dichloroethane (0.025 mmol) as internal standard. The reaction was monitored by <sup>1</sup>H, <sup>19</sup>F and <sup>31</sup>P{<sup>1</sup>H} NMR spectroscopy and GC-MS. NMR data for coupling products were in accordance with those reported in the literature.

## Scope

| Acyl Chloride                                                                       | Conditions                                        | Product                                                                              | Yield (%) <sup>a</sup> | Ref |
|-------------------------------------------------------------------------------------|---------------------------------------------------|--------------------------------------------------------------------------------------|------------------------|-----|
| 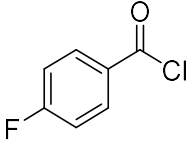   | 55 °C / 12h<br>C <sub>6</sub> F <sub>6</sub> (IS) |    | 89                     | 4   |
|    | 55 °C / 20h<br>C <sub>6</sub> F <sub>6</sub> (IS) |    | 80                     | 5   |
|    | 55 °C / 20h<br>C <sub>6</sub> F <sub>6</sub> (IS) |    | 50                     | 6   |
|    | rt / 1h<br>1,2-dichloroethane (IS)                |    | 85                     | 4   |
|   | rt / 1h<br>1,2-dichloroethane (IS)                |   | 80                     | 7   |
|  | rt / 1h<br>1,2-dichloroethane (IS)                |  | 62                     | 8   |
|  | rt / 1h<br>1,2-dichloroethane (IS)                |  | 60                     | 9   |
|  | rt / 1h<br>1,2-dichloroethane (IS)                |  | 85                     | 10  |
|  | 55 °C / 2h<br>1,2-dichloroethane (IS)             |  | 88                     | 11  |
|  | 55 °C / 8h<br>C <sub>6</sub> F <sub>6</sub> (IS)  |  | 85                     | 12  |

<sup>a</sup>Determined by relative integration with 1,2-dichloroethane or/and C<sub>6</sub>F<sub>6</sub> as internal standards.

## Competitive Stille experiments with complex II as catalyst

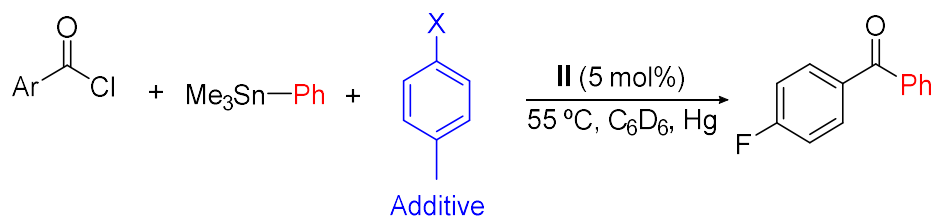

| Acyl Chloride | Additive | Conditions  | % of unreacted additive <sup>a</sup> | Yield of the product (%) <sup>b</sup> |
|---------------|----------|-------------|--------------------------------------|---------------------------------------|
|               |          | 55 °C / 20h | 98                                   | 76                                    |
|               |          | 55 °C / 20h | 98                                   | 83                                    |
|               |          | 55 °C / 20h | 98                                   | 80                                    |

<sup>a</sup>Determined by relative integration with 1,2-dichloroethane as an internal standard. <sup>b</sup>Determined by relative integration with 1,2-dichloroethane and C<sub>6</sub>F<sub>6</sub> as internal standards.

## Selective Stille coupling of bifunctional substrates

| Acyl Chloride | Conditions                                                  | Product | Yield (%) <sup>a</sup> | Ref |
|---------------|-------------------------------------------------------------|---------|------------------------|-----|
|               | 55 °C / 4h<br>1,2-dichloroethane (IS)<br>*CDCl <sub>3</sub> |         | 75                     | 13  |
|               | 55 °C / 3h<br>1,2-dichloroethane (IS)<br>*CDCl <sub>3</sub> |         | 85                     | 14  |
|               | 55 °C / 6.5h<br>C <sub>6</sub> F <sub>6</sub> (IS)          |         | 80                     | 15  |

## 5. Stoichiometric and catalytic reactions of $(\mu\text{-Ph})[\text{Au}(\text{PBCy}_2)]_2\text{NTf}_2$ complex **A**

### Stoichiometric reactions of complex **A** with 4-fluorobenzoyl chloride

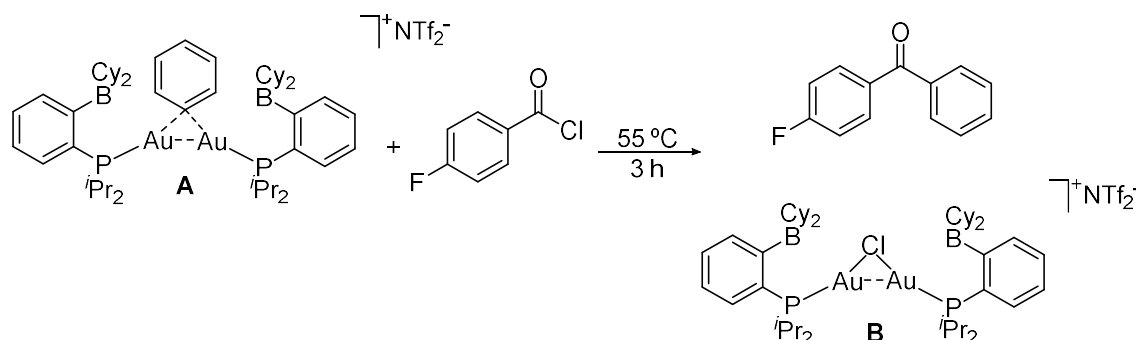

In NMR tube, a mixture of 4-fluorobenzoyl chloride (0.2 M in  $\text{C}_6\text{D}_6$ , 10  $\mu\text{L}$ , 0.002 mmol, 1 Equiv.) and complex **A** (3 mg, 0.002 mmol, 1 Equiv.) was added and dissolved in 0.6 ml  $\text{C}_6\text{D}_6$ . The reaction was monitored by  $^1\text{H}$ ,  $^{19}\text{F}$  and  $^{31}\text{P}\{^1\text{H}\}$  NMR spectroscopy at 55 °C. After 3 hours, 4-fluorobenzophenone (90%), and **A** were observed (1:1 ratio).

### Stille coupling with **A** as catalyst

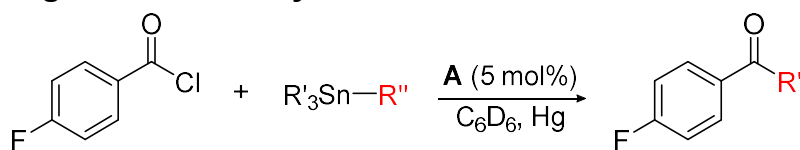

| Organostannane           | Conditions                                                         | Additive | Product | Yield (%) <sup>a</sup> | Ref |
|--------------------------|--------------------------------------------------------------------|----------|---------|------------------------|-----|
| $\text{Me}_3\text{SnPh}$ | 55 °C / 20h<br>$\text{C}_6\text{F}_6$ (IS)                         | None     |         | 87                     | 4   |
|                          | 55 °C / 6.5h<br>$\text{C}_6\text{F}_6$ (IS)                        | None     |         | 93                     | 15  |
| $\text{Me}_3\text{SnPh}$ | 55 °C / 6.5h<br>$\text{C}_6\text{F}_6$ and 1,2-dichloroethane (IS) |          |         | 82                     | 4   |

<sup>a</sup>Determined by relative integration with 1,2-dichloroethane or/and  $\text{C}_6\text{F}_6$  as internal standards.

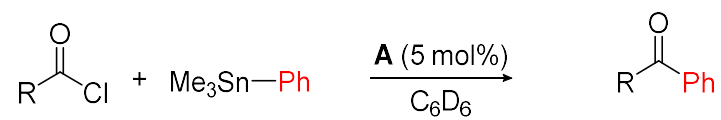

| Acid chloride                                                                     | Conditions                                         | Product                                                                           | Yield (%) <sup>a</sup> | Ref |
|-----------------------------------------------------------------------------------|----------------------------------------------------|-----------------------------------------------------------------------------------|------------------------|-----|
| 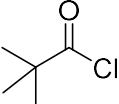 | 55°C / 1h30<br>C <sub>6</sub> Me <sub>6</sub> (IS) |  | 70                     | 12  |
|  | r.t. / 1h<br>C <sub>6</sub> Me <sub>6</sub> (IS)   |  | 78                     | 10  |

<sup>a</sup>Determined by relative integration with hexamethylbenzene as internal standard

## 6. $^{31}\text{P}$ NMR monitoring of catalytic Stille coupling with **II** as catalyst

Catalytic Stille coupling of 4-fluorobenzoyl chloride or tertbutyl acid chloride and  $\text{Me}_3\text{SnPh}$  with **II** as catalyst were monitored by  $^{31}\text{P}$  NMR spectroscopy. Only complex **A** ( $\delta \sim 58$  ppm) and **B** ( $\delta \sim 55$  ppm) were observed.

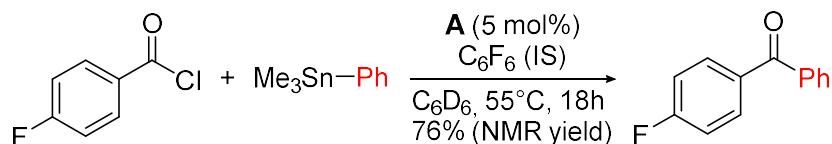

A solution of 4-fluorobenzoyl chloride (4.8  $\mu\text{L}$ , 0.040 mmol, 1 equiv.),  $\text{Me}_3\text{SnPh}$  (7.3  $\mu\text{L}$ , 0.040 mmol, 1 equiv.) and  $\text{C}_6\text{F}_6$  (2  $\mu\text{L}$ , 0.017 mmol, 0.43 1 equiv.) in 0.6 mL of  $\text{C}_6\text{D}_6$  was added to the catalyst **A** (3 mg, 0.002 mmol, 5 mol%) in an NMR tube. The tube was sealed and the reaction monitored by  $^{19}\text{F}\{^1\text{H}\}$  NMR and  $^{31}\text{P}\{^1\text{H}\}$  NMR spectroscopy at  $55^\circ\text{C}$ .

$^{31}\text{P}\{^1\text{H}\}$  NMR spectrum (121 MHz, 298 K) in  $\text{C}_6\text{D}_6$

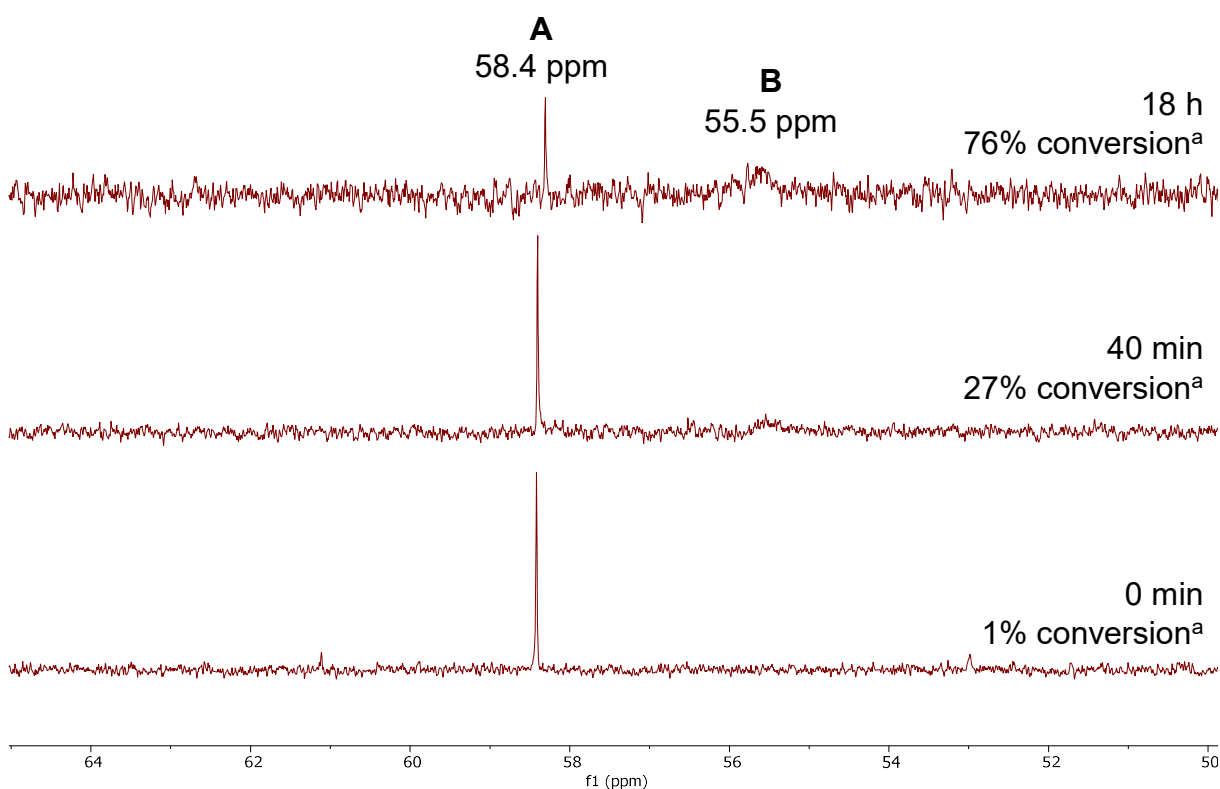

<sup>a</sup>Conversion of *p*-FPhCOCl determined by relative integration with  $\text{C}_6\text{F}_6$  as internal standard.

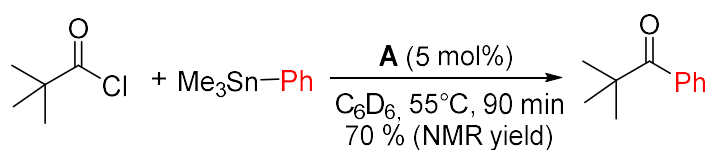

A solution of pivaloyl chloride (4.8  $\mu\text{L}$ , 0.039 mmol, 1 equiv.) and  $\text{Me}_3\text{SnPh}$  (7.3  $\mu\text{L}$ , 0.040 mmol, 1 equiv.) in 0.6 mL of  $\text{C}_6\text{D}_6$  was added to the catalyst **A** (3 mg, 0.002 mmol, 5 mol%) and hexamethylbenzene (7 mg, 0.043 mmol, 1.1 Equiv.) as internal standard inside an NMR tube. The tube was sealed and monitored by  $^1\text{H}$  and  $^{31}\text{P}\{^1\text{H}\}$  NMR spectroscopy at  $55^\circ\text{C}$ .

$^{31}\text{P}\{^1\text{H}\}$  NMR spectrum (121 MHz, 298 K)

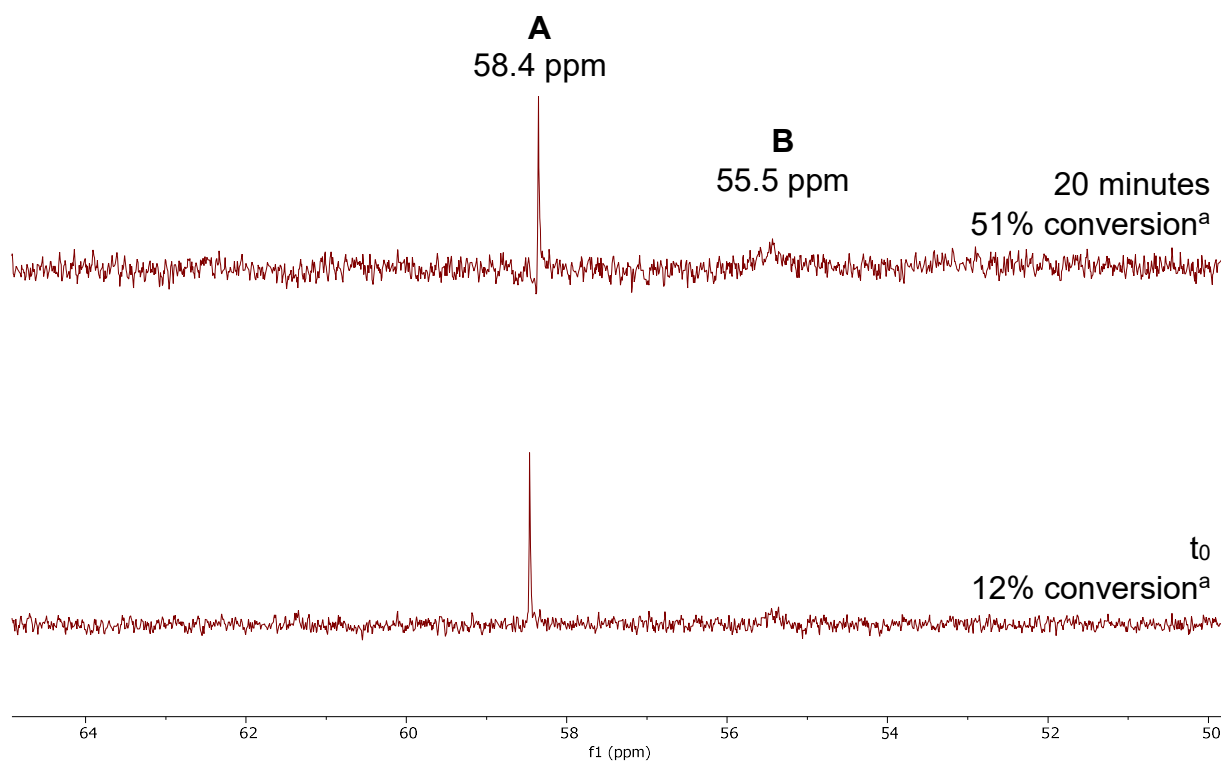

<sup>a</sup>Conversion of  $t\text{BuCOCl}$  determined by relative integration with hexamethylbenzene as internal standard.

## 7. Determination of kinetic dependence on II in catalytic Stille coupling

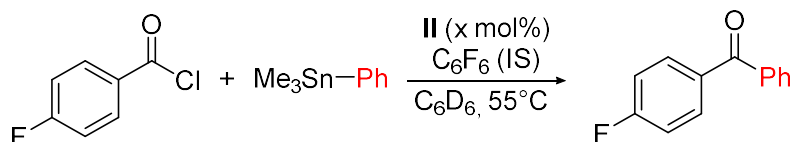

A solution of 4-fluorobenzoyl chloride (4.8  $\mu\text{L}$ , 0.040 mmol, 1 Equiv.), trimethyl(phenyl)tin (7.3  $\mu\text{L}$ , 0.040 mmol, 1 Equiv.) and  $\text{C}_6\text{F}_6$  (0.017 mmol) in 600  $\mu\text{L}$  of  $\text{C}_6\text{D}_6$ , for a total volume of 614.1  $\mu\text{L}$  was prepared. The solution was added to different amount of catalyst II in an NMR tube. The tube was sealed and the reaction was monitored by  $^{19}\text{F}\{^1\text{H}\}$  NMR spectroscopy at  $55^\circ\text{C}$  every 2 minutes for 30 minutes.

| m of II (mg) | n of II (mmol) | x mol % |
|--------------|----------------|---------|
| 1.7          | 0.002          | 5.0%    |
| 3.4          | 0.004          | 10.0%   |
| 4.2          | 0.005          | 12.5%   |
| 5.1          | 0.006          | 15.0%   |

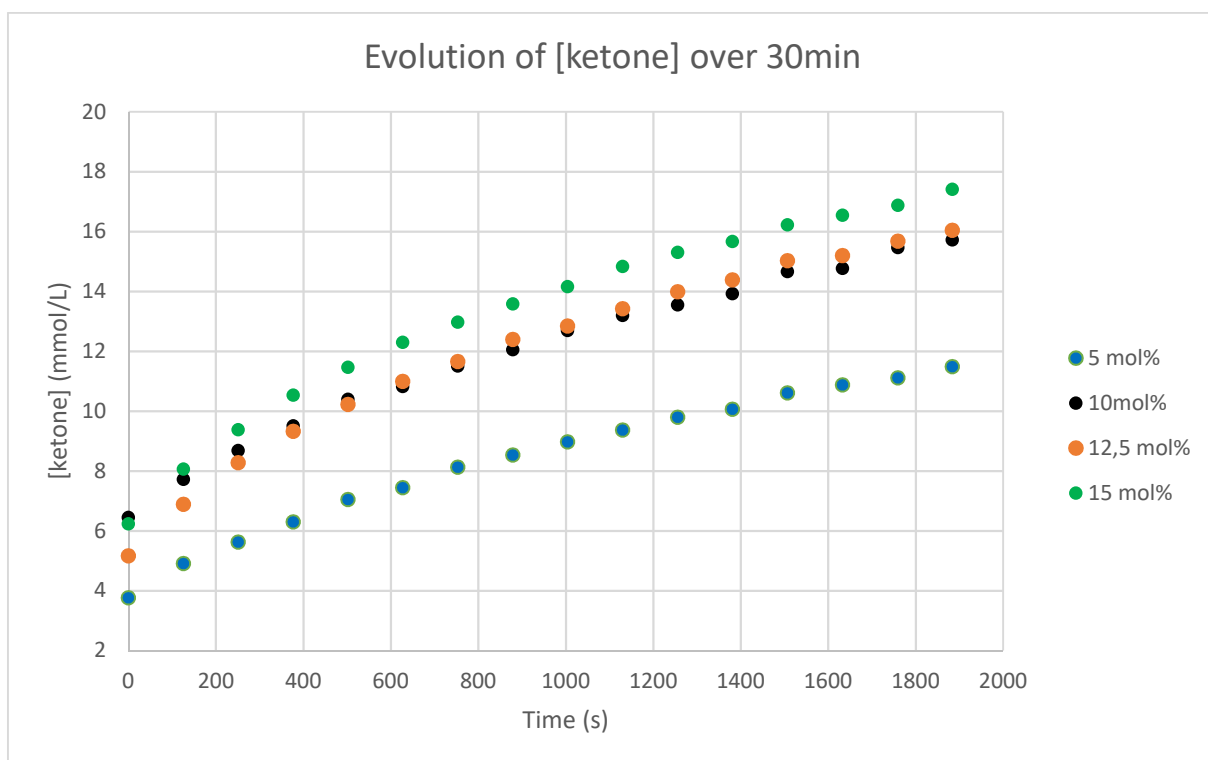

Initial rates were determined through linear regression over the first 6 minutes. The initial conversions were corrected to take into account the set up of the reaction and NMR monitoring.



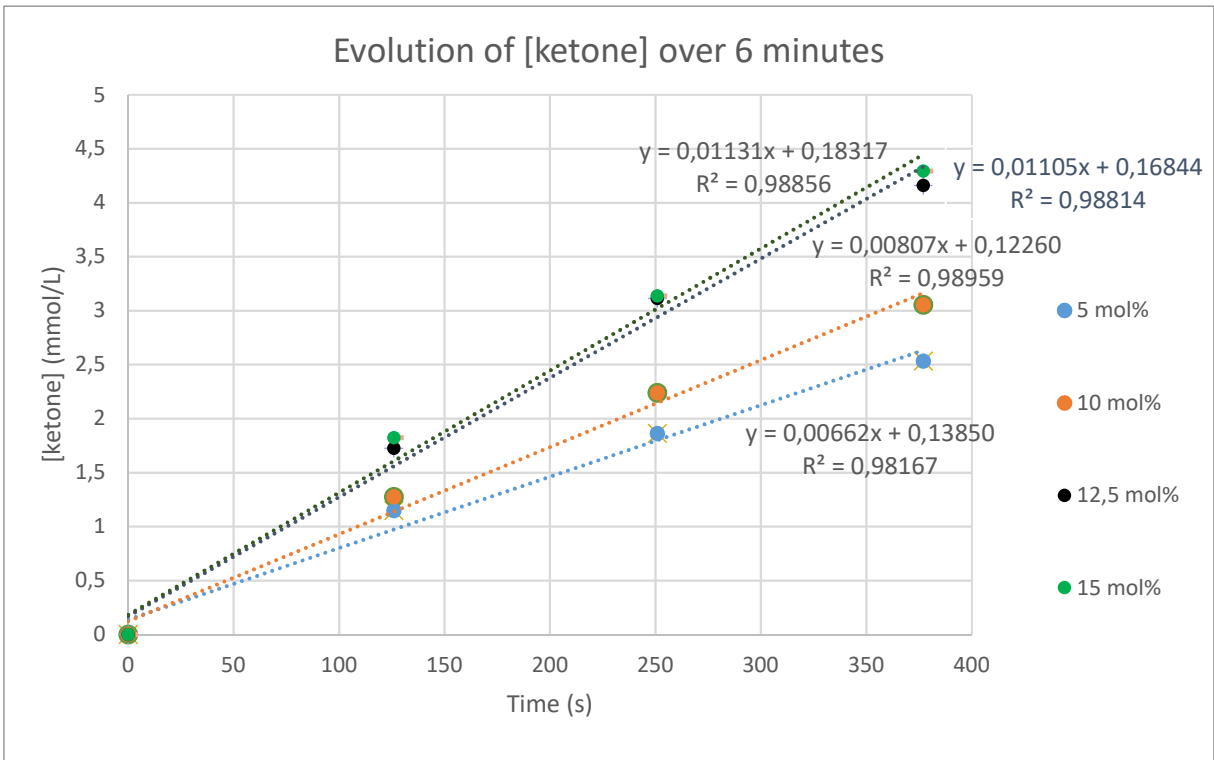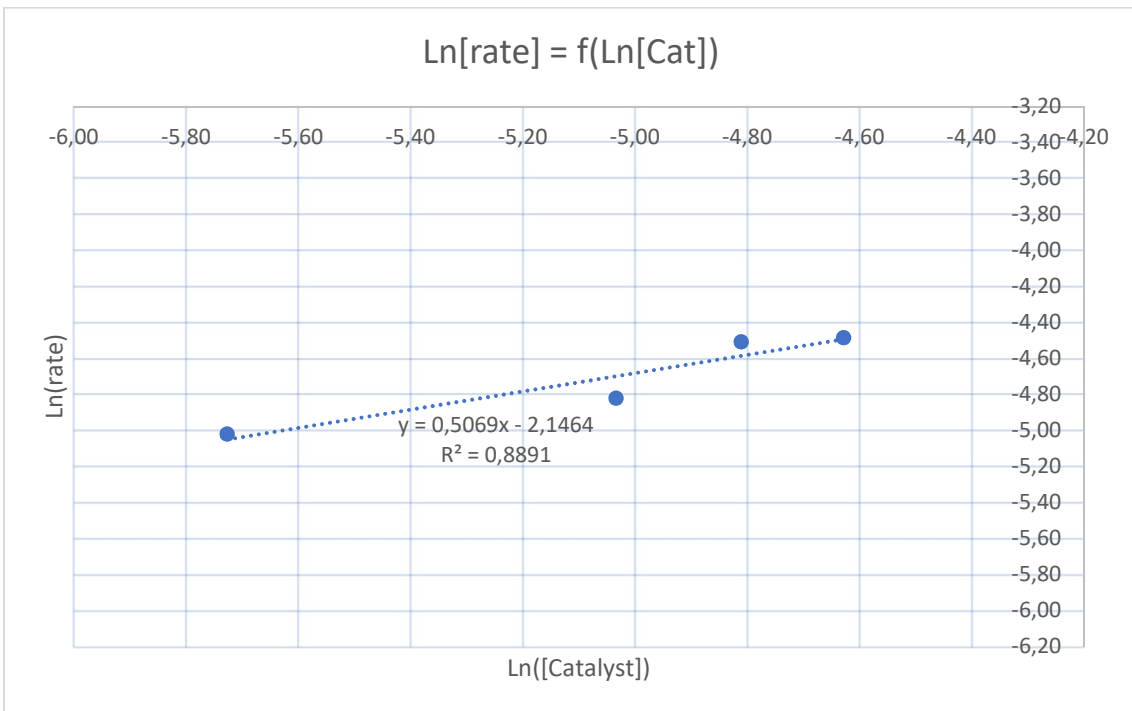

## 8. Stille coupling with (Ph<sub>3</sub>P)AuNTf<sub>2</sub> as catalyst

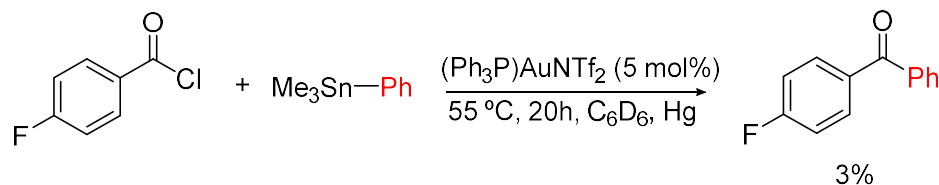

A mixture of acyl chloride (40  $\mu\text{L}$ , 0.34 mmol, 1 Equiv.) and Me<sub>3</sub>SnPh (61  $\mu\text{L}$ , 0.34 mmol, 1 Equiv.) was dissolved in 0.6 mL of C<sub>6</sub>D<sub>6</sub>. The solution was added to NMR tube containing catalyst (Ph<sub>3</sub>P)AuNTf<sub>2</sub> (13 mg, 0.017 mmol, 5 mol%), Hg drops and C<sub>6</sub>F<sub>6</sub> (0.017 mmol) as internal standard. The reaction was monitored by multinuclear NMR spectroscopy. At 55 °C, after 20h, only a 3% of 4-fluorobenzophenone was formed.

## 9. Stille coupling with ( $\mu$ -MeOPh)[Au(PPh<sub>3</sub>)<sub>2</sub>]NTf<sub>2</sub> in the presence of BPh<sub>3</sub> or BMe<sub>3</sub>

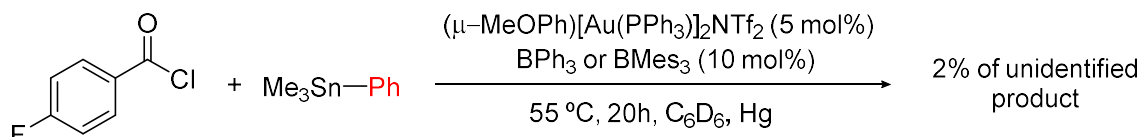

A mixture of acyl chloride (10  $\mu\text{L}$ , 0.08 mmol, 1 Equiv.) and Me<sub>3</sub>SnPh (14  $\mu\text{L}$ , 0.08 mmol, 1 Equiv.) was dissolved in 0.6 mL of C<sub>6</sub>D<sub>6</sub>. The solution was added to NMR tube containing catalyst ( $\mu$ -MeOPh)[Au(PPh<sub>3</sub>)<sub>2</sub>]NTf<sub>2</sub> (5 mg, 0.004 mmol, 5 mol%) and BPh<sub>3</sub> or BMe<sub>3</sub> (10 mol%), Hg drops and C<sub>6</sub>F<sub>6</sub> (0.017 mmol) as internal standard. The reaction was monitored by multinuclear NMR spectroscopy. At 55 °C after 20h, no traces of ketone were detected and only 2% of unidentified product was observed.

## 10. Stoichiometric reaction of complex B with Me<sub>3</sub>SnPh

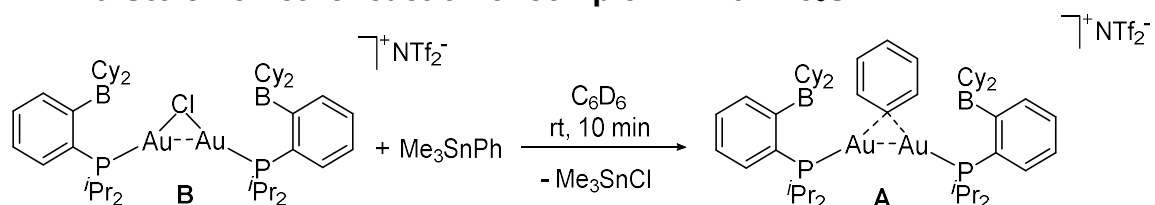

A solution of Me<sub>3</sub>SnPh (0.007 mmol, 1 Equiv.) in 0.3 ml of C<sub>6</sub>D<sub>6</sub> was added at room temperature to a solution of complex B (10 mg, 0.007 mmol) in 0.3 ml of C<sub>6</sub>D<sub>6</sub>. The reaction was monitored by <sup>1</sup>H and <sup>31</sup>P{<sup>1</sup>H} NMR spectroscopy. A mixture of complex A and Me<sub>3</sub>SnCl was observed (1:1 ratio).

## 11. Crystallographic Data

Crystallographic data were collected at low temperature (193(2) K) on a Bruker APEX II Quazar diffractometer equipped with a 30 W air-cooled microfocus source using MoK $\alpha$  radiation ( $\lambda = 0.71073 \text{ \AA}$ ) for **A**, and on a Bruker D8 VENTURE diffractometer equipped with a PHOTON III detector, using MoK $\alpha$  radiation ( $\lambda = 0.71073 \text{ \AA}$ ) for **I** and a microfocus source with CuK $\alpha$  radiation ( $\lambda = 1.54184 \text{ \AA}$ ) for **B**. Phi and Omega scans were performed for data collection. An empirical absorption correction was applied<sup>16</sup> and the structures were solved by intrinsic phasing method (ShelXT).<sup>17</sup> All non-hydrogen atoms were refined anisotropically by means of least-squares procedures on F<sup>2</sup> with ShelXL [3].<sup>18</sup> All the hydrogen atoms were refined isotropically at calculated positions using a riding model.

**Crystal Data, Data Collection, and Structure Refinement for III, A and B.**

| ID                                                                      | III                                  | A                                                                                                                                               | B                                                                                                                                                 |
|-------------------------------------------------------------------------|--------------------------------------|-------------------------------------------------------------------------------------------------------------------------------------------------|---------------------------------------------------------------------------------------------------------------------------------------------------|
| formula                                                                 | C <sub>30</sub> H <sub>45</sub> AuBP | C <sub>54</sub> H <sub>85</sub> Au <sub>2</sub> B <sub>2</sub> P <sub>2</sub> ,<br>C <sub>2</sub> F <sub>6</sub> NO <sub>4</sub> S <sub>2</sub> | C <sub>48</sub> H <sub>80</sub> Au <sub>2</sub> B <sub>2</sub> CIP <sub>2</sub> ,<br>C <sub>2</sub> F <sub>6</sub> NO <sub>4</sub> S <sub>2</sub> |
| <i>M<sub>r</sub></i>                                                    | 644.41                               | 1491.88                                                                                                                                         | 1450.23                                                                                                                                           |
| crystal system                                                          | orthorhombic                         | triclinic                                                                                                                                       | monoclinic                                                                                                                                        |
| space group                                                             | <i>Pbca</i>                          | <i>P</i> $\bar{1}$                                                                                                                              | <i>P2<sub>1</sub>/n</i>                                                                                                                           |
| <i>a</i> (Å)                                                            | 8.4826(8)                            | 10.8707(11)                                                                                                                                     | 9.5720(4)                                                                                                                                         |
| <i>b</i> (Å)                                                            | 17.7973(16)                          | 11.6793(12)                                                                                                                                     | 39.2345(15)                                                                                                                                       |
| <i>c</i> (Å)                                                            | 37.589(5)                            | 48.430(5)                                                                                                                                       | 15.7352(6)                                                                                                                                        |
| $\alpha$ (°)                                                            | 90                                   | 89.013(2)                                                                                                                                       | 90                                                                                                                                                |
| $\beta$ (°)                                                             | 90                                   | 86.081(2)                                                                                                                                       | 95.739(2)                                                                                                                                         |
| $\gamma$ (°)                                                            | 90                                   | 85.987(2)                                                                                                                                       | 90                                                                                                                                                |
| <i>V</i> (Å <sup>3</sup> )                                              | 5674.7(11)                           | 6118.9(11)                                                                                                                                      | 5879.8(4)                                                                                                                                         |
| <i>Z</i>                                                                | 8                                    | 4                                                                                                                                               | 4                                                                                                                                                 |
| $\rho_{\text{calc}}$ (g cm <sup>-3</sup> )                              | 1.509                                | 1.619                                                                                                                                           | 1.638                                                                                                                                             |
| $\mu$ (mm <sup>-1</sup> )                                               | 5.257                                | 4.972                                                                                                                                           | 11.344                                                                                                                                            |
| <i>F</i> (000)                                                          | 2592                                 | 2976                                                                                                                                            | 2880                                                                                                                                              |
| crystal size<br>(mm <sup>3</sup> )                                      | 0.28 x 0.12 x<br>0.10                | 0.08 x 0.06 x<br>0.04                                                                                                                           | 0.20 x 0.18 x 0.16                                                                                                                                |
| <i>T</i> /K                                                             | 193(2)                               | 193(2)                                                                                                                                          | 193(2)                                                                                                                                            |
| measd rflns                                                             | 131410                               | 89767                                                                                                                                           | 135298                                                                                                                                            |
| Unique rflns<br>( <i>R</i> <sub>int</sub> )                             | 11338<br>(0.0710)                    | 24972 (0.1017)                                                                                                                                  | 10790 (0.0568)                                                                                                                                    |
| Data/restraints/p<br>arameters                                          | 11338 / 0/<br>302                    | 24972 / 1144 /<br>1628                                                                                                                          | 10790 / 0 / 639                                                                                                                                   |
| GOF on <i>F</i> <sup>2</sup>                                            | 1.038                                | 1.020                                                                                                                                           | 1.087                                                                                                                                             |
| <i>R</i> <sub>1</sub> <sup>a</sup> [ <i>I</i> >2 $\sigma$ ( <i>I</i> )] | 0.0224                               | 0.0566                                                                                                                                          | 0.0271                                                                                                                                            |
| <i>wR</i> <sub>2</sub> <sup>b</sup> [all data]                          | 0.0528                               | 0.1203                                                                                                                                          | 0.0678                                                                                                                                            |

$${}^a R_1 = \sum ||F_o| - |F_c|| / \sum |F_o|. \quad {}^b wR_2 = [\sum [w(F_o^2 - F_c^2)^2] / \sum [w(F_o^2)^2]]^{1/2}.$$

## 12. References

1. S. Bontemps, G. Bouhadir, K. Miqueu and D. Bourissou, *J. Am. Chem. Soc.* 2006, **128**, 12056–12057.
2. M. W. P. Bebbington, S. Bontemps, G. Bouhadir and D. Bourissou, *Angew. Chem. Int. Ed.*, 2007, **46**, 3333–3336.
3. R. Declercq, G. Bouhadir, D. Bourissou, M.-A. Légaré, M.-A. Courtemanche, K. S. Nahi, N. Bouchard, F.-G. Fontaine and L. Maron, *ACS Catal.* 2015, **5**, 2513–2520.
4. J.-Y. Chen, S.-C. Chen, Y.-J. Tang, C.-Y. Mou and F.-Y. Tsai, *J. Mol. Catal. A: Chem* 2009, **307**, 88–92.
5. A. Yu, L. Shen, X. Cui, D. Peng and Y. Wu, *Tetrahedron*, 2012, **68**, 2283–2288.
6. J. Liu, Y. Xiao, J. Hao and Q. Shen. *Org. Lett.*, 2023, **25**, 1204–1208.
7. T. L. H. Doan, T. Q. Dao, H. N. Tran, P. H. Tran and T. N. Le, *Dalton Trans.* 2016, **45**, 7875–7880.
8. B. Zhao and X. Li. *Org. Lett.* 2006, **8**, 5987–5990.
9. K. Moriyama, M. Takemura and H. Togo, *Org. Lett.* 2012, **14**, 2414–2417.
10. J. Zhao, Z. Luo, Y. Liu, J. Xu, Z. Huang and W. Xiong, *Tetrahedron* 2023, **131**, 133208.
11. M. Shibuya, M. Tomizawa, Y. Sasano and Y. Iwabuchi, *J. Org. Chem.* 2009, **74**, 4619–4622.
12. M. Boudjelel, O. Sadek, S. Mallet-Ladeira, Y. García-Rodeja, E. D. Sosa Carrizo, K. Miqueu, G. Bouhadir and D. Bourissou, *ACS Catal.* 2021, **11**, 3822–3829.
13. L. Tang, F. Yang, H. Cheng, C. Tan, C. Jin, H. Chen, Y. Huang, S. Zhang, W. Song and J. Tan, *Org. Lett.* 2020, **22**, 8618–8623.
14. D. Kato, T. Murase, J. Talode, H. Nagae, H. Tsurugi, M. Seki and K. Mashima, *Chem. Eur. J.* 2022, **28**, e2022004.
15. M. Katsuya, T. Tadashi, S. Masanori, H. Shuhei and S. Hidehiro. *Chem. Lett.* 2011, **40**, 1445–1446.
16. Bruker, *SADABS*, Bruker AXS Inc., Madison, Wisconsin, USA, 2008.
17. ShelXT and G. M. Sheldrick, University of Göttingen, *Acta Crystallogr. Sect. A*, 2015, **71**, 3–8.
18. ShelXL and G. M. Sheldrick, University of Göttingen, *Acta Crystallogr. Sect. C*, 2015, **71**, 3–8.
